# Supplementary material for: Examination of the Brønsted–Evans–Polanyi relationship for the hydrogen evolution reaction on transition metals based on constant electrode potential density functional theory
Source: Royal Society of Chemistry journal article supplement (doi:10.1039/d1cp05723e), 2022-01-01
Supplement: d1cp05723e1.pdf [file d1cp05723e1.pdf]

*Supporting Information for*

**Examination of the Brønsted–Evans–Polanyi Relationship for the Hydrogen  
Evolution Reaction on Transition Metals Based on Constant Electrode  
Potential Density Functional Theory**

Yao-Lin Cheng,<sup>a</sup> Chi-Tien Hsieh,<sup>a</sup> Min-Hsiu Shen,<sup>a</sup> Tzu-Hsuan Chao<sup>a</sup> and Mu-Jeng Cheng<sup>a,\*</sup>

<sup>a</sup>*Department of Chemistry, National Cheng Kung University, Tainan, 701, Taiwan*

## Computational Details

The PBE functional<sup>1</sup> with projector augmented wave pseudopotentials (400 eV energy cutoff)<sup>2, 3</sup> as implemented in the Vienna ab initio Simulation Package<sup>4-7</sup> was used to perform all calculations. A Gaussian-smearing method with a parameter of  $k_B T = 0.1$  eV was used to accelerate SCF convergence, and the calculated electronic energies were extrapolated to  $k_B T = 0$  eV. A Monkhorst-Pack  $k$ -point net of  $3 \times 3 \times 1$  was chosen to sample the reciprocal space for the slab calculations. Using a denser  $5 \times 5 \times 1$   $k$ -point net leads to less than 0.02 eV variation in the hydrogen binding energy on the top site. This indicates that  $k$ -point net of  $3 \times 3 \times 1$  is enough to obtain accurate energetics. The (111) and (100) index surfaces of the eight metals were simulated using a  $3 \times 3$  three-layer slab (Figure S1). During the geometric optimizations, the top two layers and adsorbates were allowed to relax, whereas the bottom layer was fixed in its bulk position. The bulk cell parameter for Ag, Au, Cu, Ni, Pd, Rh, Ir, and Pt are 4.086, 4.073, 3.615, 3.516, 3.890, 3.804, 3.900, and 3.944 Å, respectively. A vacuum of at least 30 Å was introduced to avoid interactions between replicas along the  $z$ -direction. Spin-polarized wavefunction was used for Ni and Pd, whereas spin-unpolarized one was used for the other metals.

Figure S1. Top and side views of (111) and (100) index surface of the slab model. The top (T) and hollow (H) sites are marked.

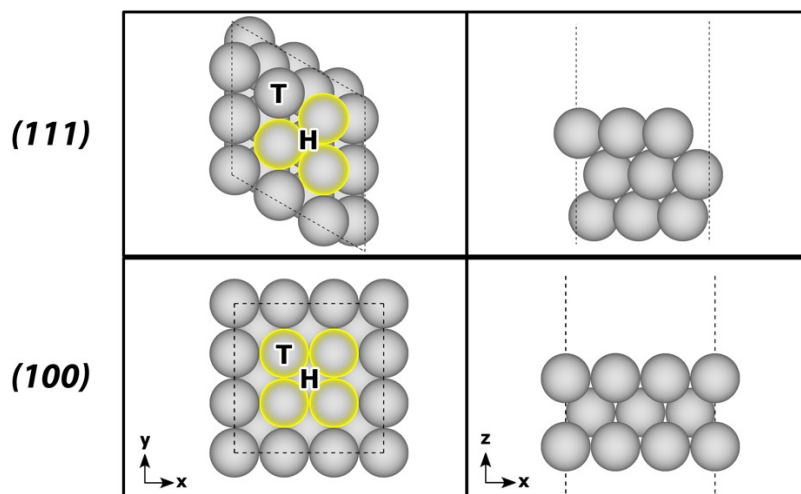

To simulate the electrochemical systems, the approach proposed by Head-Gordon et al.<sup>8</sup> was applied in this study. In this model, the Fermi energy is adjusted to a target value by changing the number of electrons in the system during each step of the geometry optimization. This allows one to fix the work function and hence the electrode potential in the calculations. The  $U$  of the electrode was calculated by relating the work function ( $\Phi$ ) of the system to the experimental work function of the standard hydrogen electrode (SHE) as follows:

$$U = \frac{\Phi - \Phi_{\text{SHE}}}{e}.$$

A value of 4.3 eV, suggested by Anderson and co-workers in their theoretical study, was used for  $\Phi_{\text{SHE}}$ .<sup>9</sup> To provide a more realistic description of the electrochemical double layer and to maintain charge neutrality of the cell, the linear Poisson-Boltzmann implicit solvation model with a Debye screening length of 3.0 Å (corresponding to 1.0 M concentration of the electrolyte) as implemented in VASPsol was used.<sup>10</sup> All the energetics reported in this study were calculated under the condition of  $U = -0.5 \text{ V}_{\text{SHE}}$  and  $\text{pH} = 0$ .

A proton solvated by the water cluster ( $\text{H}^+\cdot 4\text{H}_2\text{O}$ , the Eigen proton solvated model) was transferred to \* and \*H to locate the transition states (TSs) of the Volmer and Heyrovsky steps. This approach has been used by a previous theoretical study and the calculated barriers were in good agreement with that by transferring a proton from water bilayers to the surface.<sup>11</sup> The kinetic barriers were obtained by referencing the free energy of the transition state to the free energy of the initial state solvated by four explicit water molecules plus the free energy of a proton-electron pair.<sup>12</sup> The charge transfer coefficient is assumed to be 0.5 for the transition states, which is in the range of the experimentally determined value of 0.3 to 0.7.<sup>13</sup>

The free energies of the slab systems were calculated based on the equation as follows:

$$G = E_{elect} + ZPVE + \sum_v \frac{hv}{e^{hv/k_b T} - 1} - T \times S_{vib}$$

The vibrational frequencies were only evaluated for surface adsorbates by evaluating the partial Hessian matrix via the finite difference approach to obtain the zero-point vibrational energy (ZPVE). The low vibrational modes with a frequency  $< 50 \text{ cm}^{-1}$  were adjusted to have a value of  $50 \text{ cm}^{-1}$  to avoid a spurious contribution to the entropy. The constant electrode potential method applied in this work leads to different numbers of electrons for each stationary point along the reaction path, and therefore the calculated  $G$  needs to be corrected based on the following equation:

$$G^{corr}(U) = G(U) - (N_{e,U} - N_{e,0})\mu_e(U),$$

where  $N_{e,U}$  and  $N_{e,0}$  are the number of electrons in the system under the target  $U$  and zero charge, respectively, and  $\mu_e(U)$  is the chemical potential of the electrons under  $U$  and is equal to the Fermi energy.

The vibrational frequencies for each stationary point were examined. Each transition state has one imaginary frequency, corresponding to the reaction direction. In addition, there are no imaginary frequencies for reactants, intermediates, and products. The transition states were located using the dimer method<sup>14,15</sup> and further verified by vibrational frequency calculations where only one imaginary frequency was present.

The ALMO-EDA analysis was performed using the Q-Chem package with the same PBE functional. For the basis sets, LanL2DZ was used for Pt, and 6-31G\*\* was used for the others. During optimization, the coordinates for all Pt atoms were fixed in their bulk positions.

## References

1. J. P. Perdew, K. Burke and M. Ernzerhof, *Phys. Rev. Lett.*, 1996, **77**, 3865-3868.
2. P. E. Blochl, *Phys. Rev. B*, 1994, **50**, 17953-17979.
3. G. Kresse and D. Joubert, *Phys. Rev. B*, 1999, **59**, 1758-1775.
4. G. Kresse and J. Hafner, *Phys. Rev. B*, 1993, **47**, 558-561.
5. G. Kresse and J. Hafner, *Phys. Rev. B*, 1994, **49**, 14251-14269.
6. G. Kresse and J. Furthmuller, *Comput. Mater. Sci.*, 1996, **6**, 15-50.
7. G. Kresse and J. Furthmuller, *Phys. Rev. B*, 1996, **54**, 11169-11186.
8. J. D. Goodpaster, A. T. Bell and M. Head-Gordon, *J. Phys. Chem. Lett.*, 2016, **7**, 1471-1477.
9. R. Jinnouchi and A. B. Anderson, *J Phys Chem C*, 2008, **112**, 8747-8750.
10. K. Mathew, V. S. C. Kolluru, S. Mula, S. N. Steinmann and R. G. Hennig, *J. Chem. Phys.*, 2019, **151**.

11. M. Van den Bossche, E. Skulason, C. Rose-Petruck and H. Jonsson, *J. Phys. Chem. C*, 2019, **123**, 4116-4124.
12. M. T. Tang, X. Y. Liu, Y. F. Ji, J. K. Norskov and K. R. Chan, *J. Phys. Chem. C*, 2020, **124**, 28083-28092.
13. A. J. Bard and L. R. Faulkner, *Electrochemical Methods: Fundamentals and Applications*, John Wiley & Sons, Inc., 2001.
14. G. Henkelman and H. Jonsson, *J. Chem. Phys.* 1999, **111**, 7010–7022;
15. P. Xiao, D. Sheppard, J. Rogal and G. Henkelman, *J. Chem. Phys.* 2014, **140**, 174104

## 2. Calculated Free Energies and its Energy Components

Table S1. Calculated free energies for each species in the aqueous phase under  $-0.5 V_{\text{SHE}}$

| Metal(111)               | $E_{\text{SCF}}$ | Added $e^-$ | $E_{\text{SCF}}^{\text{corr}}$ | ZPE      | $H_{\text{vib}}$ | $S_{\text{vib}}$ | G(eV)             |
|--------------------------|------------------|-------------|--------------------------------|----------|------------------|------------------|-------------------|
| <b>Pt(111)_Rf_sur</b>    | -220.93633       | 1.52521     | -213.65940                     | 14.64274 | 1.92829          | 14.64493         | <b>-213.13067</b> |
| <b>Pt(111)_Rf_top</b>    | -224.55863       | 1.48910     | -217.45369                     | 18.46403 | 2.56545          | 17.80442         | <b>-216.76816</b> |
| <b>Pt(111)_Rf_fcc</b>    | -225.50270       | 1.63691     | -217.69202                     | 18.01093 | 2.08621          | 14.38132         | <b>-217.00436</b> |
| <b>Pt(111)_Volmer</b>    | -223.19546       | 1.21124     | -217.41700                     | 18.44291 | 1.20571          | 7.32290          | <b>-216.65959</b> |
| <b>Pt(111)_Heyrovsky</b> | -225.50296       | 1.15904     | -219.97202                     | 22.42351 | 1.97957          | 12.72157         | <b>-219.07821</b> |
| <b>Ir(111)_Rf_sur</b>    | -286.26433       | 1.17514     | -280.75375                     | 14.61415 | 1.92114          | 14.57220         | <b>-280.22128</b> |
| <b>Ir(111)_Rf_top</b>    | -290.22813       | 1.20459     | -284.57969                     | 18.71933 | 2.23352          | 14.77659         | <b>-283.86236</b> |
| <b>Ir(111)_Rf_fcc</b>    | -290.69583       | 1.30407     | -284.58105                     | 18.10429 | 2.05950          | 14.28400         | <b>-283.89021</b> |
| <b>Ir(111)_Volmer</b>    | -288.25104       | 0.86556     | -284.19200                     | 17.43533 | 1.40373          | 8.68950          | <b>-283.48736</b> |
| <b>Ir(111)_Heyrovsky</b> | -291.29638       | 0.85506     | -287.28897                     | 22.54165 | 2.41785          | 17.17429         | <b>-286.42857</b> |
| <b>Rh(111)_Rf_sur</b>    | -245.31237       | 0.91948     | -241.00176                     | 14.56938 | 1.94229          | 14.73520         | <b>-240.47441</b> |
| <b>Rh(111)_Rf_top</b>    | -248.96949       | 0.94712     | -244.52825                     | 17.94756 | 2.57840          | 18.11777         | <b>-243.87405</b> |
| <b>Rh(111)_Rf_fcc</b>    | -249.55627       | 1.00203     | -244.85915                     | 18.57971 | 1.96594          | 13.55447         | <b>-244.14422</b> |
| <b>Rh(111)_Volmer</b>    | -247.36344       | 0.67734     | -244.18800                     | 17.46260 | 1.40206          | 8.47334          | <b>-243.47946</b> |

|                          |            |         |            |          |         |          |                   |
|--------------------------|------------|---------|------------|----------|---------|----------|-------------------|
| <b>Rh(111)_Heyrovsky</b> | -250.20092 | 0.57845 | -247.48932 | 22.62012 | 2.32622 | 17.28532 | <b>-246.63093</b> |
| <b>Pd(111)_Rf_sur</b>    | -195.43111 | 1.11057 | -190.29284 | 14.59523 | 1.94233 | 14.74496 | <b>-189.76341</b> |
| <b>Pd(111)_Rf_top</b>    | -199.05281 | 1.15026 | -193.73033 | 17.65697 | 2.88042 | 22.47315 | <b>-193.12983</b> |
| <b>Pd(111)_Rf_fcc</b>    | -200.08399 | 1.23244 | -194.38124 | 18.51935 | 2.00591 | 14.34487 | <b>-193.67532</b> |
| <b>Pd(111)_Volmer</b>    | -198.12761 | 0.95950 | -193.68695 | 18.41667 | 1.62941 | 10.79804 | <b>-192.95722</b> |
| <b>Pd(111)_Heyrovsky</b> | -200.02113 | 0.72070 | -196.68955 | 22.02023 | 2.30898 | 17.76632 | <b>-195.86413</b> |
| <b>Ni(111)_Rf_sur</b>    | -198.99468 | 0.71322 | -195.70274 | 14.64180 | 1.92071 | 14.56476 | <b>-195.17000</b> |
| <b>Ni(111)_Rf_top</b>    | -202.58162 | 0.75778 | -199.08462 | 17.60302 | 2.78755 | 21.99448 | <b>-198.48001</b> |
| <b>Ni(111)_Rf_fcc</b>    | -203.07080 | 0.75777 | -199.57384 | 18.82525 | 1.94304 | 13.81852 | <b>-198.84798</b> |
| <b>Ni(111)_Volmer</b>    | -201.42651 | 0.54907 | -198.89272 | 17.43509 | 1.33582 | 7.68758  | <b>-198.17809</b> |
| <b>Ni(111)_Heyrovsky</b> | -203.80245 | 0.37082 | -202.09100 | 22.45749 | 2.31390 | 17.94830 | <b>-201.24876</b> |
| <b>Cu(111)_Rf_sur</b>    | -154.56520 | 0.61283 | -151.76867 | 14.61966 | 1.92180 | 14.57429 | <b>-151.24104</b> |
| <b>Cu(111)_Rf_top</b>    | -157.49892 | 0.57964 | -154.85414 | 17.36267 | 2.75702 | 21.80432 | <b>-154.25930</b> |
| <b>Cu(111)_Rf_fcc</b>    | -158.44158 | 0.66139 | -155.42353 | 18.82993 | 1.89928 | 13.22214 | <b>-154.69197</b> |
| <b>Cu(111)_Volmer</b>    | -156.58401 | 0.44596 | -154.54860 | 17.06743 | 1.80842 | 12.31407 | <b>-153.88921</b> |
| <b>Cu(111)_Heyrovsky</b> | -158.94434 | 0.20017 | -158.03068 | 22.63633 | 2.25177 | 17.07468 | <b>-157.17209</b> |
| <b>Au(111)_Rf_sur</b>    | -145.67248 | 1.10547 | -140.75590 | 14.62195 | 1.93085 | 14.65900 | <b>-140.23164</b> |
| <b>Au(111)_Rf_top</b>    | -148.75603 | 1.12775 | -143.73991 | 17.62769 | 2.73124 | 20.07050 | <b>-143.11652</b> |
| <b>Au(111)_Rf_fcc</b>    | -149.61355 | 1.25089 | -144.05022 | 17.90594 | 2.21927 | 16.35986 | <b>-143.38871</b> |
| <b>Au(111)_Volmer</b>    | -148.17064 | 1.00203 | -143.71431 | 18.60363 | 1.62301 | 10.68050 | <b>-142.97523</b> |
| <b>Au(111)_Heyrovsky</b> | -149.67592 | 0.64456 | -146.83973 | 21.49745 | 1.97000 | 12.75602 | <b>-145.98693</b> |
| <b>Ag(111)_Rf_sur</b>    | -128.31132 | 0.52951 | -126.06201 | 14.55317 | 1.97129 | 14.99443 | <b>-125.53721</b> |
| <b>Ag(111)_Rf_top</b>    | -131.27483 | 0.56692 | -128.86735 | 17.27431 | 2.68419 | 21.08282 | <b>-128.27697</b> |
| <b>Ag(111)_Rf_fcc</b>    | -132.25486 | 0.69135 | -129.31883 | 18.26713 | 1.94008 | 13.36193 | <b>-128.61641</b> |
| <b>Ag(111)_Volmer</b>    | -130.38624 | 0.43859 | -128.52311 | 17.27082 | 1.96389 | 13.67562 | <b>-127.86575</b> |
| <b>Ag(111)_Heyrovsky</b> | -132.42951 | 0.04512 | -132.23781 | 21.25694 | 2.24018 | 15.97638 | <b>-131.42534</b> |

| <b>Metal(100)</b>        | <b>E<sub>SCF</sub></b> | <b>Added e<sup>-</sup></b> | <b>E<sub>SCF</sub><sup>corr</sup></b> | <b>ZPE</b> | <b>H<sub>vib</sub></b> | <b>S<sub>vib</sub></b> | <b>G(eV)</b>      |
|--------------------------|------------------------|----------------------------|---------------------------------------|------------|------------------------|------------------------|-------------------|
| <b>Pt(100)_Rf_sur</b>    | -217.51274             | 1.73784                    | -208.91217                            | 14.70357   | 1.89690                | 14.40706               | <b>-208.37632</b> |
| <b>Pt(100)_Rf_top</b>    | -221.56139             | 1.78357                    | -212.73183                            | 17.99986   | 2.85807                | 22.24210               | <b>-212.11295</b> |
| <b>Pt(100)_Rf_fcc</b>    | -222.22012             | 1.85326                    | -213.04852                            | 18.63080   | 2.06783                | 14.02902               | <b>-212.33372</b> |
| <b>Pt(100)_Volmer</b>    | -219.30464             | 1.35230                    | -212.61089                            | 17.64487   | 1.32542                | 8.63552                | <b>-211.89986</b> |
| <b>Pt(100)_Heyrovsky</b> | -222.30987             | 1.40320                    | -215.36361                            | 22.28850   | 2.38628                | 18.00098               | <b>-214.52624</b> |
| <b>Ir(100)_Rf_sur</b>    | -281.51643             | 1.58713                    | -273.81742                            | 14.62731   | 1.92668                | 14.59757               | <b>-273.29080</b> |
| <b>Ir(100)_Rf_top</b>    | -285.50161             | 1.59873                    | -277.74409                            | 18.31064   | 2.49397                | 16.84211               | <b>-277.05548</b> |
| <b>Ir(100)_Rf_fcc</b>    | -285.89899             | 1.64641                    | -277.91242                            | 18.72112   | 2.03955                | 13.59817               | <b>-277.18547</b> |
| <b>Ir(100)_Volmer</b>    | -283.08802             | 1.18536                    | -277.33725                            | 17.84276   | 1.37757                | 9.14741                | <b>-276.62199</b> |
| <b>Ir(100)_Heyrovsky</b> | -286.28640             | 1.20530                    | -280.43768                            | 22.37672   | 2.42081                | 18.86569               | <b>-279.60616</b> |

|                          |            |          |            |          |         |          |                   |
|--------------------------|------------|----------|------------|----------|---------|----------|-------------------|
| <b>Rh(100)_Rf_sur</b>    | -241.70964 | 1.19829  | -235.89602 | 14.56438 | 1.93703 | 14.70480 | <b>-235.37446</b> |
| <b>Rh(100)_Rf_top</b>    | -245.50598 | 1.23232  | -239.52528 | 17.78243 | 2.72032 | 21.20005 | <b>-238.91488</b> |
| <b>Rh(100)_Rf_fcc</b>    | -245.46286 | 1.18437  | -239.71535 | 16.74964 | 2.30374 | 15.33468 | <b>-239.09194</b> |
| <b>Rh(100)_Volmer</b>    | -242.55746 | 0.70076  | -239.15737 | 17.21379 | 1.46063 | 9.37314  | <b>-238.46871</b> |
| <b>Rh(100)_Heyrovsky</b> | -246.16825 | 0.75936  | -242.48361 | 22.53461 | 2.27487 | 17.13259 | <b>-241.62918</b> |
| <b>Pd(100)_Rf_sur</b>    | -192.31828 | 1.14334  | -186.85563 | 14.56166 | 1.92941 | 14.64417 | <b>-186.33413</b> |
| <b>Pd(100)_Rf_top</b>    | -196.13525 | 1.21182  | -190.34408 | 17.67476 | 2.80449 | 21.97339 | <b>-189.73590</b> |
| <b>Pd(100)_Rf_fcc</b>    | -197.18035 | 1.32397  | -190.85270 | 16.45675 | 2.36451 | 15.60072 | <b>-190.23544</b> |
| <b>Pd(100)_Volmer</b>    | -194.71200 | 0.92936  | -190.27087 | 18.28590 | 1.34048 | 8.23995  | <b>-189.52628</b> |
| <b>Pd(100)_Heyrovsky</b> | -196.85163 | 0.71805  | -193.41160 | 21.78917 | 2.27470 | 17.04614 | <b>-192.58838</b> |
| <b>Ni(100)_Rf_sur</b>    | -195.75115 | 0.83042  | -191.79138 | 14.86659 | 1.73111 | 11.91838 | <b>-191.22428</b> |
| <b>Ni(100)_Rf_top</b>    | -199.30264 | 0.85003  | -195.24910 | 17.73502 | 2.63557 | 20.21348 | <b>-194.62787</b> |
| <b>Ni(100)_Rf_fcc</b>    | -200.36638 | 0.96256  | -195.77593 | 17.66693 | 1.87666 | 11.97748 | <b>-195.08730</b> |
| <b>Ni(100)_Volmer</b>    | -197.24135 | 0.49913  | -194.86115 | 17.12594 | 1.40394 | 8.31232  | <b>-194.16504</b> |
| <b>Ni(100)_Heyrovsky</b> | -200.07911 | 0.39305  | -198.20473 | 22.41270 | 2.18238 | 16.53542 | <b>-197.35188</b> |
| <b>Cu(100)_Rf_sur</b>    | -151.99743 | 0.54926  | -149.41393 | 14.67832 | 1.86295 | 13.25707 | <b>-148.86403</b> |
| <b>Cu(100)_Rf_top</b>    | -155.02805 | 0.53980  | -152.48932 | 17.45942 | 2.67115 | 20.67219 | <b>-151.88420</b> |
| <b>Cu(100)_Rf_fcc</b>    | -156.29465 | 0.69532  | -153.02428 | 17.47676 | 1.97152 | 12.78981 | <b>-152.34193</b> |
| <b>Cu(100)_Volmer</b>    | -152.96701 | 0.18344  | -152.10403 | 16.76096 | 1.65115 | 10.85708 | <b>-151.44592</b> |
| <b>Cu(100)_Heyrovsky</b> | -155.60896 | -0.02003 | -155.70317 | 21.01345 | 2.28255 | 17.27534 | <b>-154.91621</b> |
| <b>Au(100)_Rf_sur</b>    | -144.57341 | 1.34479  | -138.43404 | 14.35620 | 2.16068 | 17.78882 | <b>-137.94364</b> |
| <b>Au(100)_Rf_top</b>    | -148.36108 | 1.50585  | -141.48567 | 17.58779 | 2.78609 | 21.86816 | <b>-140.88911</b> |
| <b>Au(100)_Rf_fcc</b>    | -148.55906 | 1.47449  | -141.82595 | 18.36622 | 2.16307 | 14.88967 | <b>-141.13219</b> |
| <b>Au(100)_Volmer</b>    | -146.72220 | 1.16038  | -141.42518 | 18.39340 | 1.45169 | 9.69617  | <b>-140.68993</b> |
| <b>Au(100)_Heyrovsky</b> | -148.56497 | 0.84323  | -144.71428 | 21.19300 | 1.93946 | 11.91813 | <b>-143.86518</b> |
| <b>Ag(100)_Rf_sur</b>    | -126.53907 | 0.49595  | -124.39240 | 14.37332 | 2.14614 | 17.35339 | <b>-123.89791</b> |
| <b>Ag(100)_Rf_top</b>    | -128.81217 | 0.37542  | -127.18698 | 17.23471 | 2.67225 | 21.03457 | <b>-126.59858</b> |
| <b>Ag(100)_Rf_fcc</b>    | -129.91402 | 0.55945  | -127.49171 | 16.59584 | 2.35632 | 15.87463 | <b>-126.87331</b> |
| <b>Ag(100)_Volmer</b>    | -127.33112 | 0.10807  | -126.86328 | 17.03765 | 1.62137 | 10.66839 | <b>-126.19203</b> |
| <b>Ag(100)_Heyrovsky</b> | -129.60705 | -0.23842 | -130.63965 | 20.68263 | 2.17484 | 15.76642 | <b>-129.85221</b> |

| Single-Atom Alloy(111) | $E_{\text{SCF}}$ | Added e <sup>-</sup> | $E_{\text{SCF}}^{\text{corr}}$ | ZPE      | $H_{\text{vib}}$ | $S_{\text{vib}}$ | G(eV)             |
|------------------------|------------------|----------------------|--------------------------------|----------|------------------|------------------|-------------------|
| <b>Pt@Au_Rf_sur</b>    | -148.77562       | 1.12866              | -143.37114                     | 14.64352 | 1.89336          | 14.38704         | <b>-142.83996</b> |
| <b>Pt@Au_Rf_top</b>    | -152.24223       | 1.09500              | -146.99959                     | 18.35919 | 2.48627          | 16.78539         | <b>-146.31256</b> |
| <b>Pt@Au_Rf_fcc</b>    | -152.84434       | 1.24353              | -146.88895                     | 17.91297 | 2.28007          | 15.80212         | <b>-146.21751</b> |
| <b>Pt@Au_Volmer</b>    | -150.81419       | 0.84285              | -146.77881                     | 17.96104 | 1.27558          | 8.02186          | <b>-146.04830</b> |
| <b>Pt@Au_Heyrovsky</b> | -153.26506       | 0.72474              | -149.79500                     | 22.22447 | 2.01522          | 13.27562         | <b>-148.91544</b> |
| <b>Rh@Au_Rf_sur</b>    | -149.90476       | 1.19384              | -144.19701                     | 14.54975 | 1.94425          | 14.76873         | <b>-143.67262</b> |



|                        |            |         |            |          |         |          |                   |
|------------------------|------------|---------|------------|----------|---------|----------|-------------------|
| <b>Rh@Au_Rf_top</b>    | -153.13619 | 1.12318 | -147.76683 | 18.21179 | 2.44130 | 16.49190 | <b>-147.08435</b> |
| <b>Rh@Au_Rf_fcc</b>    | -153.53580 | 1.22150 | -147.69654 | 17.86869 | 2.22003 | 15.04124 | <b>-147.01979</b> |
| <b>Rh@Au_Volmer</b>    | -151.20342 | 0.78924 | -147.43046 | 17.40698 | 1.40341 | 8.76848  | <b>-146.72808</b> |
| <b>Rh@Au_Heyrovsky</b> | -154.24541 | 0.72362 | -150.78622 | 21.97497 | 2.29103 | 17.09558 | <b>-149.95487</b> |
| <b>Pd@Au_Rf_sur</b>    | -148.13505 | 1.10487 | -142.85410 | 14.60597 | 1.93125 | 14.65271 | <b>-142.32634</b> |
| <b>Pd@Au_Rf_top</b>    | -151.39479 | 1.13006 | -145.99423 | 17.58422 | 2.76514 | 21.61598 | <b>-145.39114</b> |
| <b>Pd@Au_Rf_fcc</b>    | -152.10534 | 1.21431 | -146.30252 | 18.14706 | 2.02392 | 14.13505 | <b>-145.61049</b> |
| <b>Pd@Au_Volmer</b>    | -150.52030 | 0.98134 | -145.82909 | 18.46274 | 1.61215 | 9.97015  | <b>-145.08742</b> |
| <b>Pd@Au_Heyrovsky</b> | -151.84389 | 0.55160 | -149.20768 | 21.56258 | 1.92182 | 11.44693 | <b>-148.33724</b> |
| <b>Ni@Au_Rf_sur</b>    | -148.05020 | 1.17608 | -142.43936 | 14.66030 | 1.92440 | 14.61173 | <b>-141.90901</b> |
| <b>Ni@Au_Rf_top</b>    | -151.12757 | 1.14340 | -145.67332 | 17.64317 | 2.75115 | 21.63839 | <b>-145.06857</b> |
| <b>Ni@Au_Rf_fcc</b>    | -151.78516 | 1.22423 | -145.94485 | 18.08230 | 2.05168 | 14.19914 | <b>-145.25526</b> |
| <b>Ni@Au_Volmer</b>    | -149.56301 | 0.88523 | -145.33905 | 17.62797 | 1.54403 | 10.04584 | <b>-144.63750</b> |
| <b>Ni@Au_Heyrovsky</b> | -152.55397 | 0.77104 | -148.87434 | 22.09545 | 2.27790 | 16.96420 | <b>-148.03664</b> |
| <b>Cu@Au_Rf_sur</b>    | -146.57523 | 1.14455 | -141.11618 | 14.66867 | 1.92685 | 14.63374 | <b>-140.58565</b> |
| <b>Cu@Au_Rf_top</b>    | -149.62277 | 1.18751 | -143.95633 | 17.43489 | 2.70656 | 21.28722 | <b>-143.35801</b> |
| <b>Cu@Au_Rf_fcc</b>    | -150.21620 | 1.19522 | -144.51345 | 18.12668 | 2.00754 | 14.40191 | <b>-143.82646</b> |
| <b>Cu@Au_Volmer</b>    | -148.29993 | 0.97739 | -143.63612 | 17.18442 | 1.92825 | 13.63016 | <b>-142.98346</b> |
| <b>Cu@Au_Heyrovsky</b> | -151.00279 | 0.75037 | -147.42217 | 22.14126 | 1.96061 | 12.83428 | <b>-146.54288</b> |

### 3. Transition State Structures

*Metal(111)*

**Pt(111)\_Volmer**

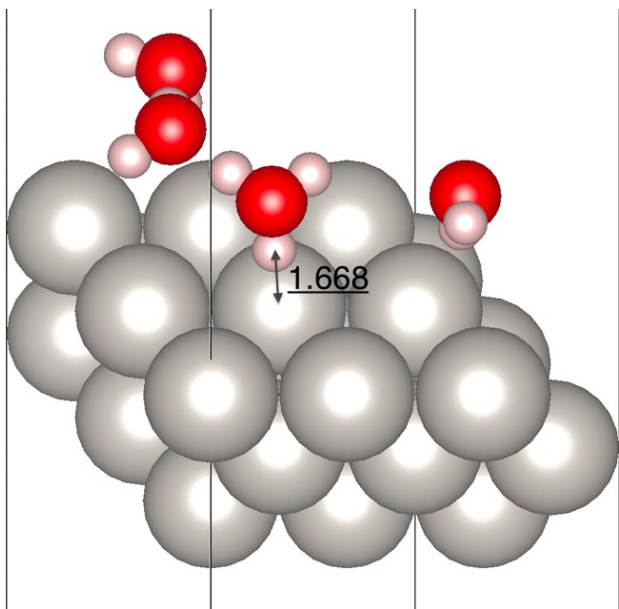

**Pt(111)\_Heyrovsky**

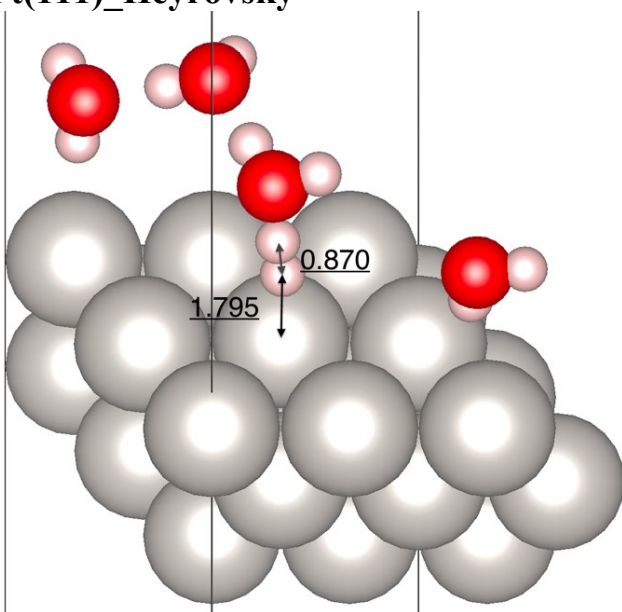

**Ir(111)\_Volmer**

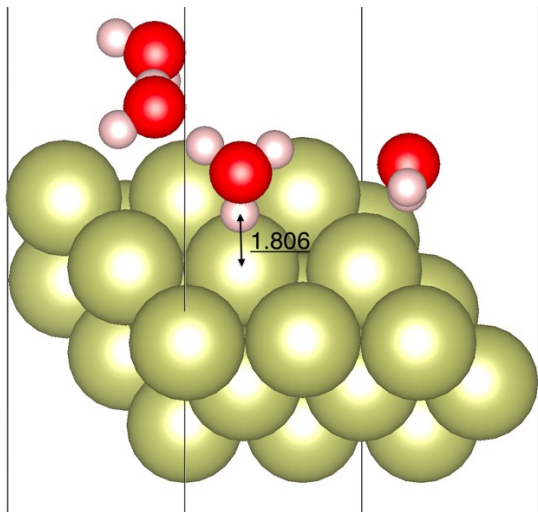

### Ir(111)\_Heyrovsky

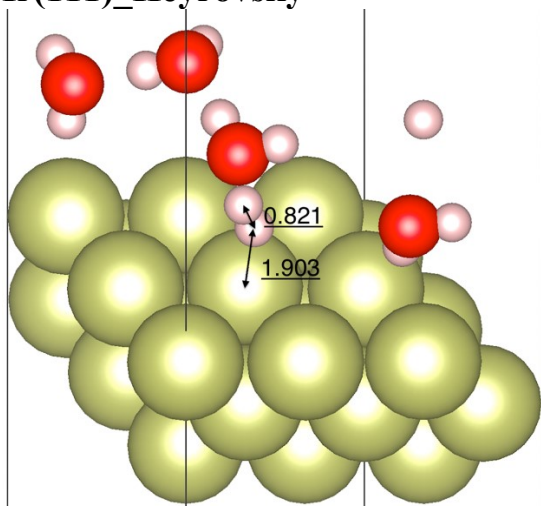

### Rh(111)\_Volmer

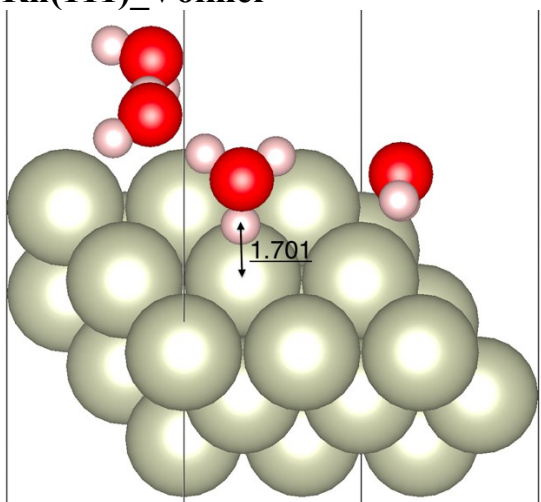

**Rh(111)\_Heyrovsky**

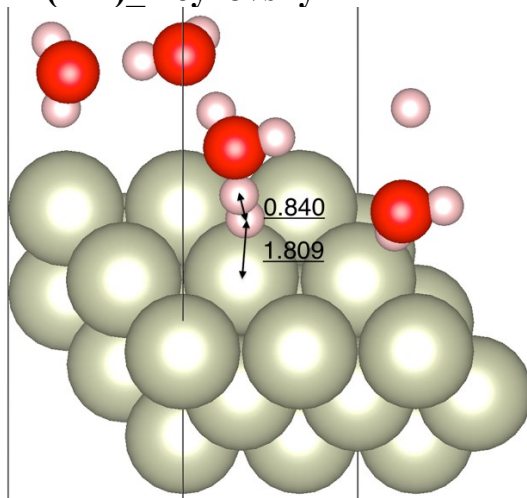

**Pd(111)\_Volmer**

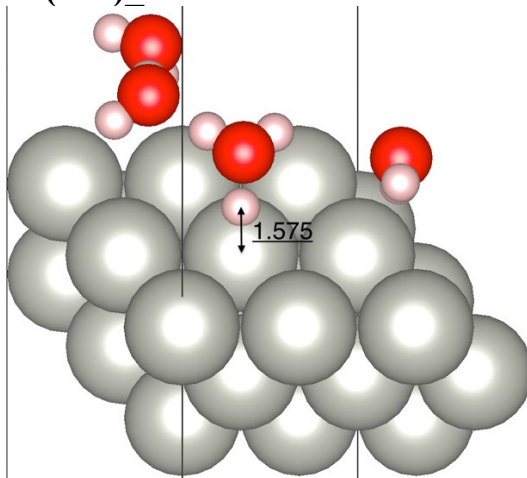

**Pd(111)\_Heyrovsky**

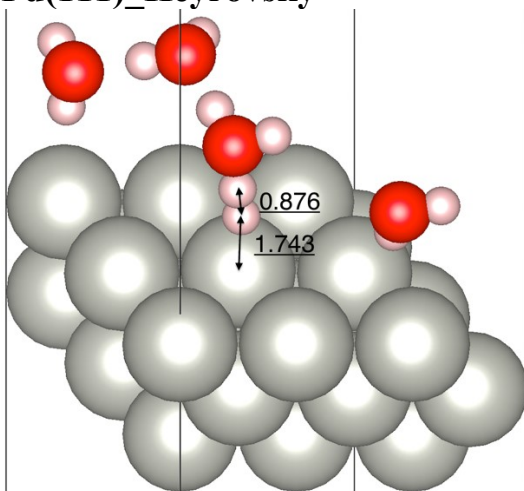

**Ni(111)\_Volmer**

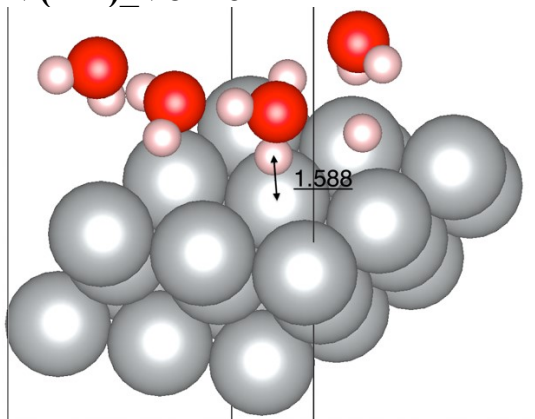

**Ni(111)\_Heyrovsky**

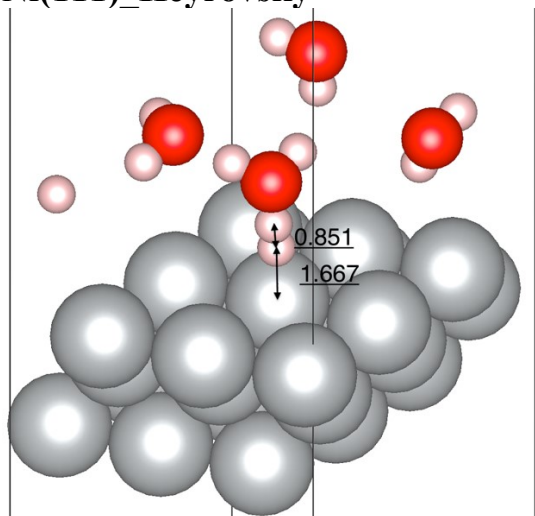

**Cu(111)\_Volmer**

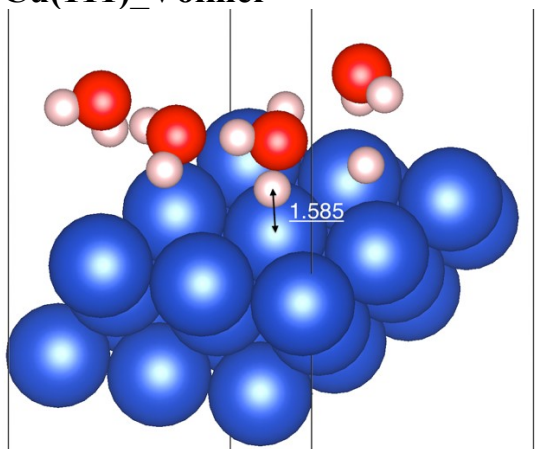

**Cu(111)\_Heyrovsky**

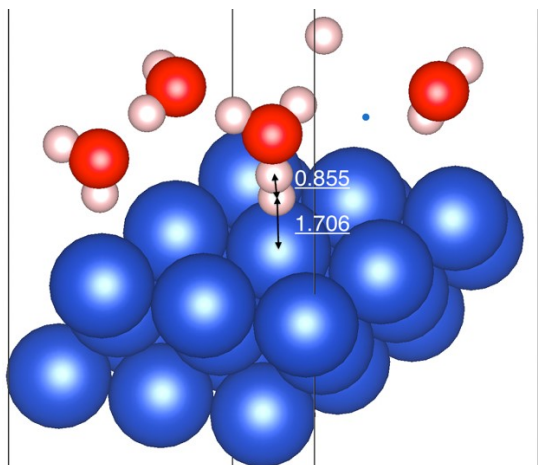

**Au(111)\_Volmer**

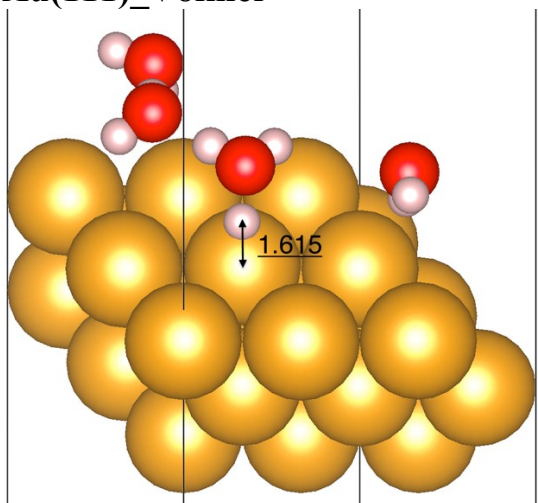

**Au(111)\_Heyrovsky**

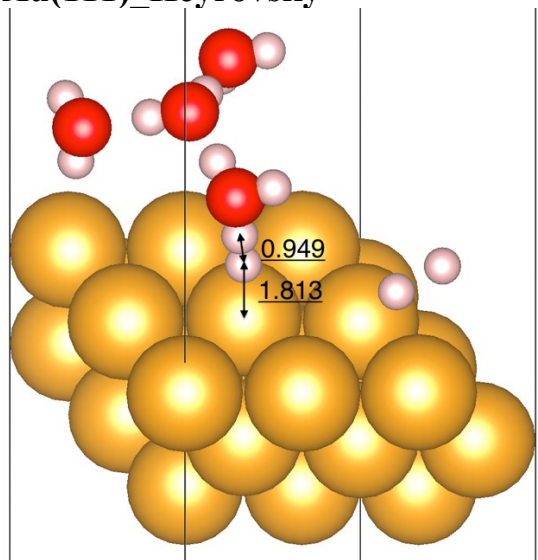

**Ag(111)\_Volmer**

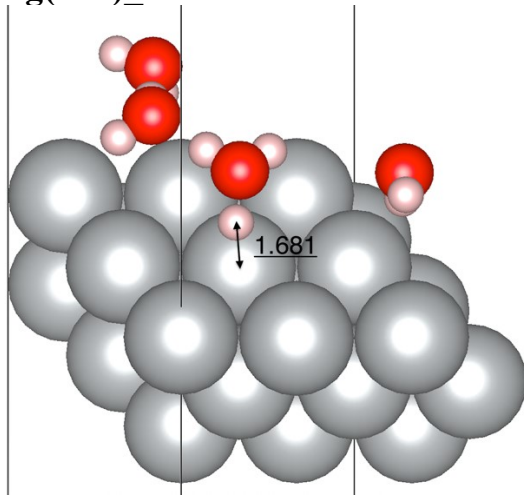

**Ag(111)\_Heyrovsky**

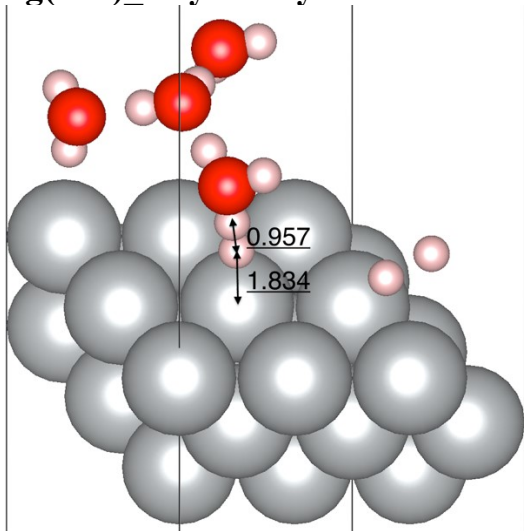

***Metal(100)***



**Pt(100)\_Volmer**

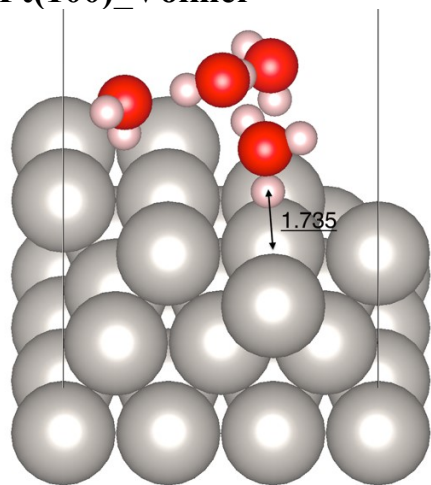

**Pt(100)\_Heyrovsky**

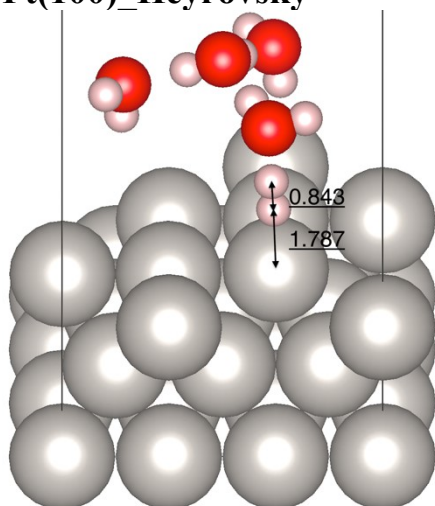

**Ir(100)\_Volmer**

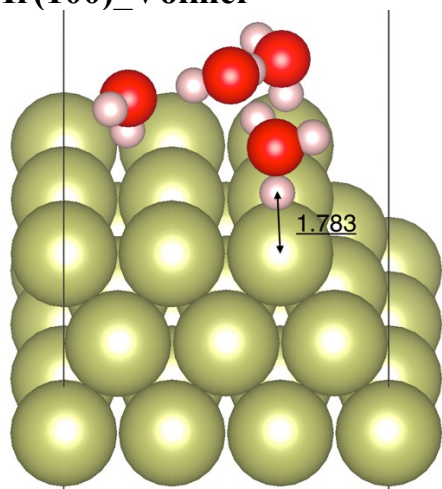



**Ir(100)\_Heyrovsky**

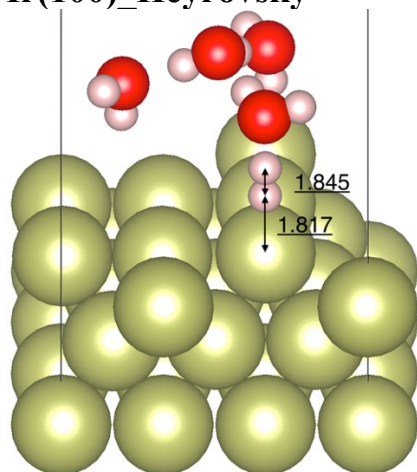

**Rh(100)\_Volmer**

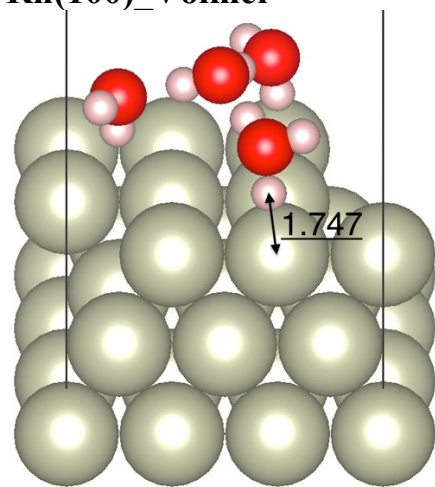

**Rh(100)\_Heyrovsky**

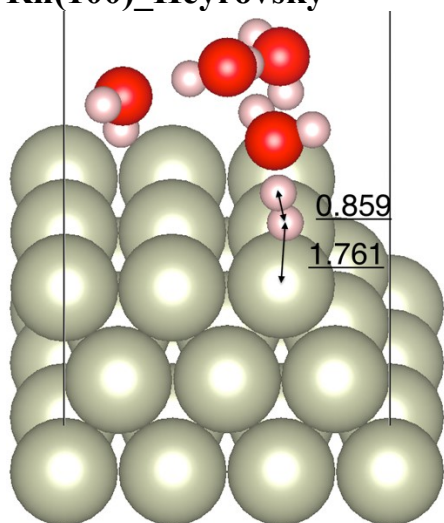

**Pd(100)\_Volmer**

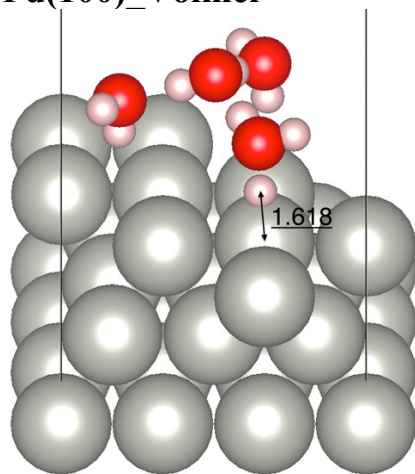

**Pd(100)\_Heyrovsky**

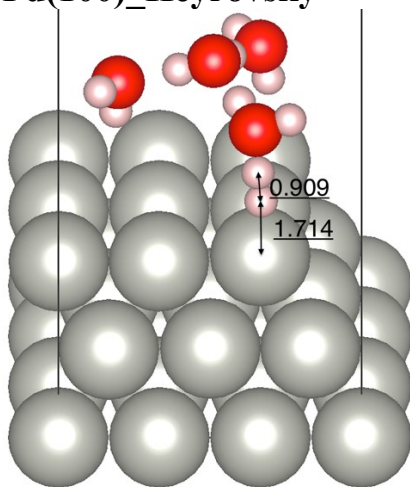

**Ni(100)\_Volmer**

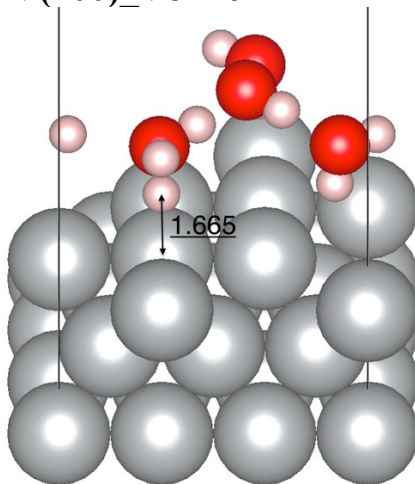

**Ni(100)\_Heyrovsky**

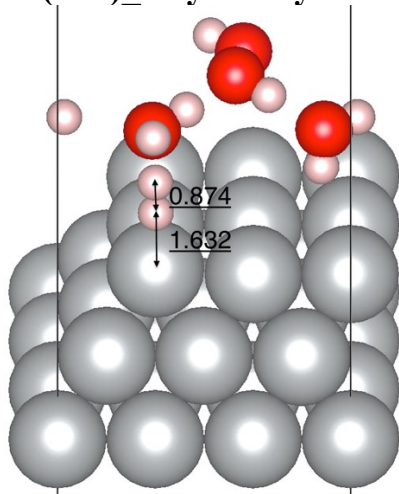

**Cu(100)\_Volmer**

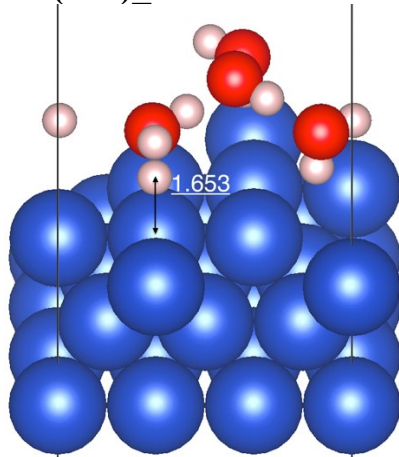

**Cu(100)\_Heyrovsky**

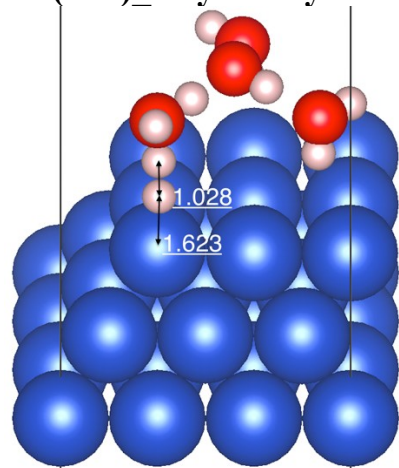

**Au(100)\_Volmer**

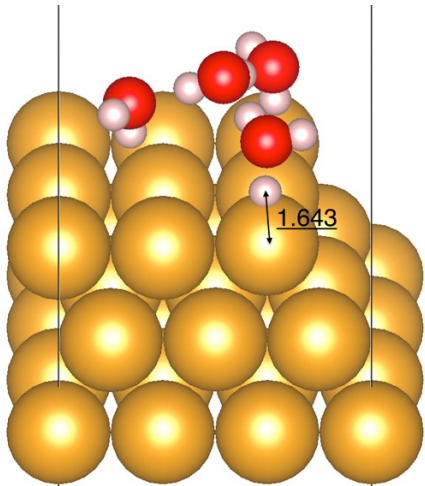

**Au(100)\_Heyrovsky**

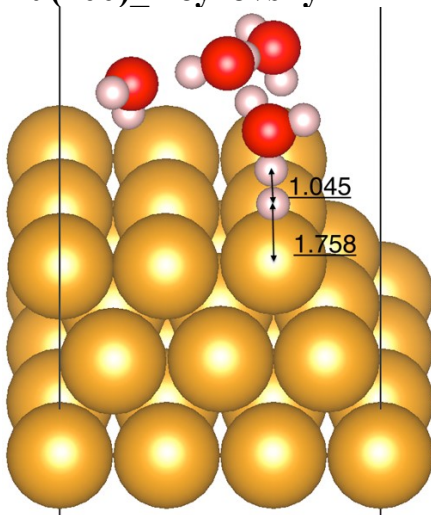

**Ag(100)\_Volmer**

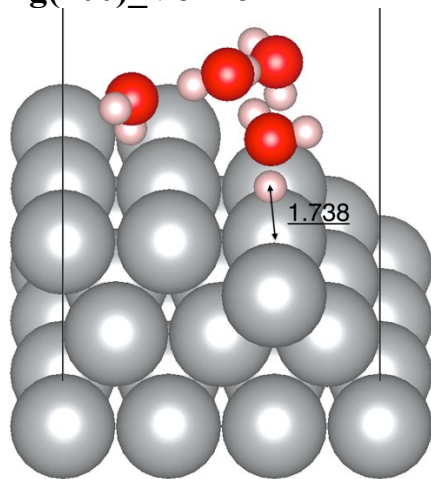

**Ag(100)\_Heyrovsky**

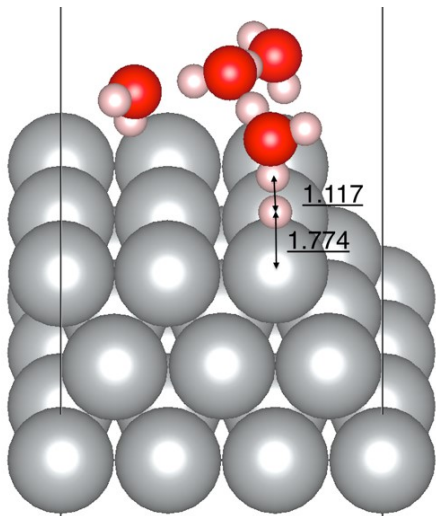

*Single Atom Alloy @Au(111)*

**Pt@Au(111)\_Volmer**

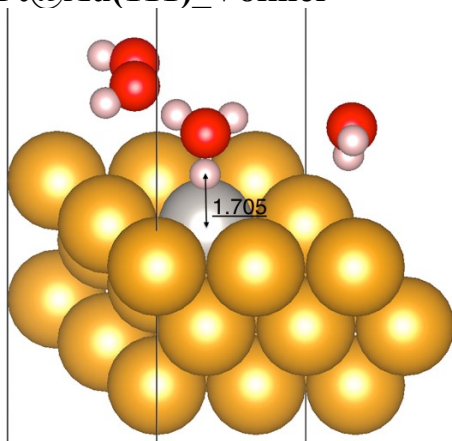

**Pt@Au(111)\_Heyrovsky**

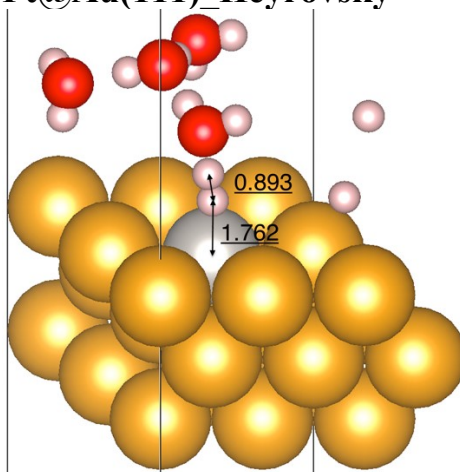

**Rh@Au(111)\_Volmer**

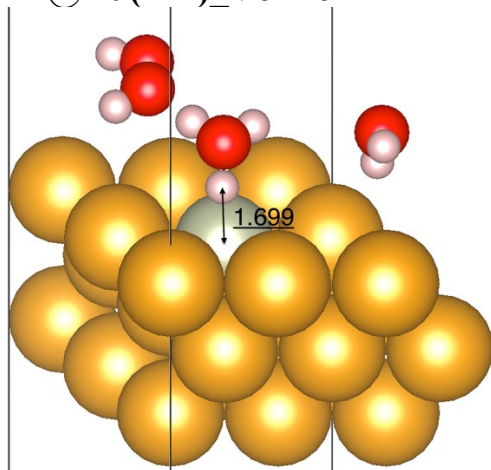

**Rh@Au(111)\_Heyrovsky**

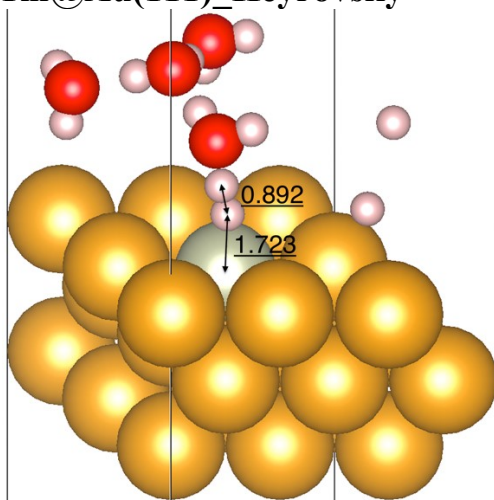

**Pd@Au(111)\_Volmer**

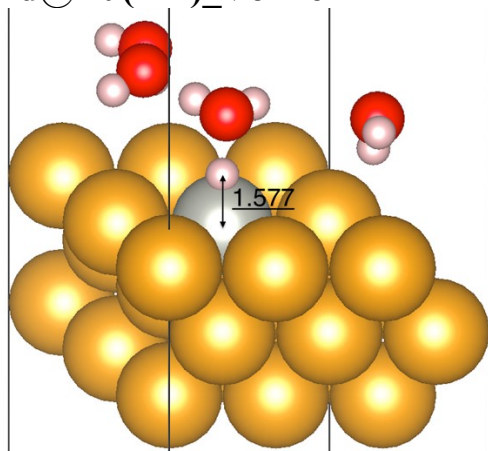



**Pd@Au(111)\_Heyrovsky**

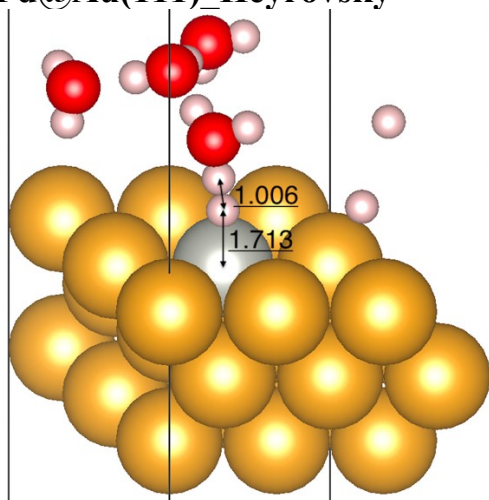

**Ni@Au(111)\_Volmer**

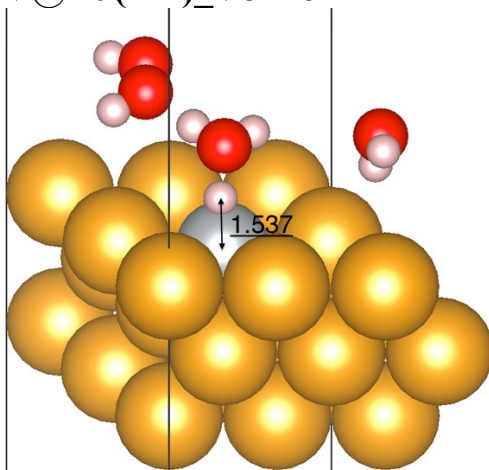

**Ni@Au(111)\_Heyrovsky**

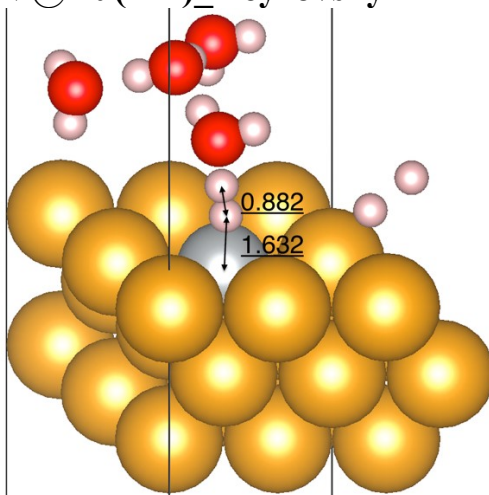

**Cu@Au(111)\_Volmer**

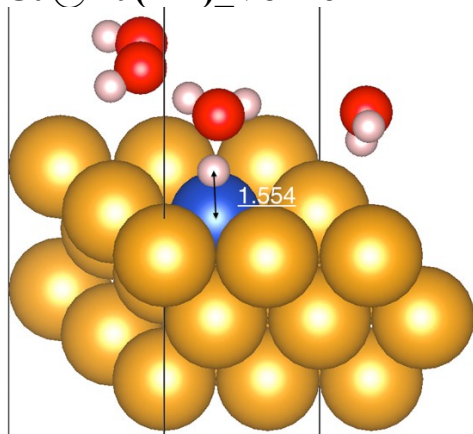

**Cu@Au(111)\_Heyrovsky**

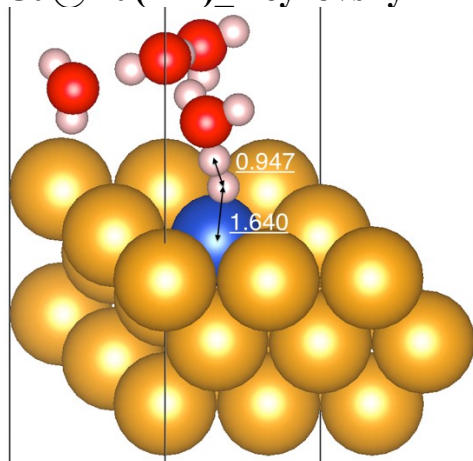

#### 4. Coordinates for Optimized Structures

**Pt(111)\_Rf\_sur**

**1.0**

|                      |                     |                      |
|----------------------|---------------------|----------------------|
| <b>8.3664999008</b>  | <b>0.0000000000</b> | <b>0.0000000000</b>  |
| <b>-4.1832499504</b> | <b>7.2456014549</b> | <b>0.0000000000</b>  |
| <b>0.0000000000</b>  | <b>0.0000000000</b> | <b>60.0000000000</b> |

**Pt H O**

**27 8 4**

**Cartesian**



|              |             |              |
|--------------|-------------|--------------|
| 0.003932484  | 0.329216563 | 29.625502825 |
| 1.396033669  | 1.133133431 | 27.291054726 |
| 0.000000000  | 1.932112119 | 24.950399995 |
| 2.790944539  | 0.328980734 | 29.624505043 |
| 4.184125200  | 1.130884784 | 27.285490036 |
| 2.788512731  | 1.932184458 | 24.950399995 |
| 5.580592551  | 0.328172217 | 29.618210793 |
| 6.974275292  | 1.130851206 | 27.285833359 |
| 5.577945530  | 1.932257012 | 24.950399995 |
| -1.390304090 | 2.743574053 | 29.623687863 |
| 0.003901939  | 3.544483854 | 27.290870547 |
| -1.394319075 | 4.347288491 | 24.950399995 |
| 1.397564997  | 2.743287938 | 29.651066065 |
| 2.788209657  | 3.544658114 | 27.290902734 |
| 1.394360964  | 4.347215937 | 24.950399995 |
| 4.184930260  | 2.743645527 | 29.623805881 |
| 5.579174657  | 3.545154766 | 27.285758257 |
| 4.183249950  | 4.347361046 | 24.950399995 |
| -2.785869434 | 5.159133063 | 29.618638158 |
| -1.392184216 | 5.961246274 | 27.285742164 |
| -2.788805333 | 6.762754433 | 24.950399995 |
| 0.003201041  | 5.157478131 | 29.624242187 |
| 1.395997390  | 5.960125136 | 27.285679579 |
| -0.000041640 | 6.762392093 | 24.950399995 |
| 2.791506819  | 5.157535138 | 29.624732137 |
| 4.184127382  | 5.961459619 | 27.286294699 |

|              |             |              |
|--------------|-------------|--------------|
| 2.788888986  | 6.762754433 | 24.950399995 |
| 1.009382004  | 3.386810160 | 34.186066389 |
| -0.715202360 | 4.746565786 | 34.642285109 |
| 5.420912015  | 0.069518302 | 33.299124241 |
| 2.331712804  | 7.058617938 | 34.365599155 |
| 0.634584140  | 5.584971751 | 34.630694389 |
| 1.445536610  | 2.642232382 | 32.875875235 |
| -2.551654485 | 4.543149559 | 33.326475620 |
| -2.753848486 | 5.637566790 | 34.404959679 |
| 0.240777756  | 4.717763844 | 34.920591116 |
| 1.365858780  | 7.127491509 | 34.246727228 |
| 1.469660613  | 2.561948765 | 33.846867085 |
| -2.419227862 | 4.731287036 | 34.274071455 |

Pt(111)\_Rf\_top

1.0

|               |              |               |
|---------------|--------------|---------------|
| 8.3664999008  | 0.0000000000 | 0.0000000000  |
| -4.1832499504 | 7.2456014549 | 0.0000000000  |
| 0.0000000000  | 0.0000000000 | 60.0000000000 |

Pt H O

27 9 4

Cartesian

|              |             |              |
|--------------|-------------|--------------|
| -0.000325795 | 0.320795959 | 29.615637660 |
| 1.395754158  | 1.129851640 | 27.300501466 |
| 0.000000000  | 1.932112119 | 24.950399995 |
| 2.795285927  | 0.320238170 | 29.615103006 |

|              |             |              |
|--------------|-------------|--------------|
| 4.183968801  | 1.131229958 | 27.282634377 |
| 2.788512731  | 1.932184458 | 24.950399995 |
| 5.580628612  | 0.328627139 | 29.623503685 |
| 6.974025888  | 1.131087116 | 27.282879353 |
| 5.577945530  | 1.932257012 | 24.950399995 |
| -1.399735294 | 2.744591542 | 29.614636302 |
| 0.000793403  | 3.546378690 | 27.300773263 |
| -1.394319075 | 4.347288491 | 24.950399995 |
| 1.398597644  | 2.743640561 | 29.705538154 |
| 2.791572520  | 3.546974241 | 27.299117446 |
| 1.394360964  | 4.347215937 | 24.950399995 |
| 4.195419293  | 2.744922571 | 29.613690376 |
| 5.579332615  | 3.546716630 | 27.276561856 |
| 4.183249950  | 4.347361046 | 24.950399995 |
| -2.785731736 | 5.159605962 | 29.617513418 |
| -1.393373947 | 5.960922370 | 27.276597619 |
| -2.788805333 | 6.762754433 | 24.950399995 |
| -0.002386693 | 5.166028323 | 29.615457058 |
| 1.395776972  | 5.960430901 | 27.282965183 |
| -0.000041640 | 6.762392093 | 24.950399995 |
| 2.797333173  | 5.166634239 | 29.614638090 |
| 4.185265624  | 5.960987583 | 27.276681662 |
| 2.788888986  | 6.762754433 | 24.950399995 |
| 1.424217569  | 2.761924489 | 31.253825426 |
| 1.002351456  | 3.398827201 | 34.200782776 |
| -0.714849044 | 4.745093104 | 34.632328749 |

|              |             |              |
|--------------|-------------|--------------|
| 5.420639080  | 0.061688741 | 33.298509121 |
| 2.321761600  | 7.050705188 | 34.375262260 |
| 0.635452844  | 5.587825990 | 34.621832371 |
| 1.445750544  | 2.643307742 | 32.901148796 |
| -2.546058849 | 4.547517507 | 33.326843977 |
| -2.738111507 | 5.633692902 | 34.415899515 |
| 0.241894056  | 4.718963583 | 34.910727739 |
| 1.361093123  | 7.127841757 | 34.252613783 |
| 1.465474674  | 2.568768016 | 33.876932859 |
| -2.415325736 | 4.724767072 | 34.277318716 |

Pt(111)\_Rf\_fcc

1.0

|               |              |               |
|---------------|--------------|---------------|
| 8.3664999008  | 0.0000000000 | 0.0000000000  |
| -4.1832499504 | 7.2456014549 | 0.0000000000  |
| 0.0000000000  | 0.0000000000 | 60.0000000000 |

Pt H O

27 9 4

Cartesian

|              |             |              |
|--------------|-------------|--------------|
| -0.012683999 | 0.331352221 | 29.634116292 |
| 1.395645694  | 1.135249602 | 27.298607826 |
| 0.000000000  | 1.932112119 | 24.950399995 |
| 2.788475610  | 0.297921750 | 29.674540758 |
| 4.181771981  | 1.134747335 | 27.298121452 |
| 2.788512731  | 1.932184458 | 24.950399995 |
| 5.588732962  | 0.330861184 | 29.634869099 |

|              |             |              |
|--------------|-------------|--------------|
| 6.971729020  | 1.136184819 | 27.288799882 |
| 5.577945530  | 1.932257012 | 24.950399995 |
| -1.394516709 | 2.755420936 | 29.658724666 |
| -0.003792603 | 3.551809258 | 27.295567989 |
| -1.394319075 | 4.347288491 | 24.950399995 |
| 1.355993723  | 2.776006739 | 29.662633538 |
| 2.788402771  | 3.547750962 | 27.298346758 |
| 1.394360964  | 4.347215937 | 24.950399995 |
| 4.219661235  | 2.774620647 | 29.662667513 |
| 5.580199449  | 3.551514506 | 27.295194268 |
| 4.183249950  | 4.347361046 | 24.950399995 |
| -2.789012551 | 5.168841534 | 29.646479487 |
| -1.394029839 | 5.962541889 | 27.296998501 |
| -2.788805333 | 6.762754433 | 24.950399995 |
| -0.001486073 | 5.168145789 | 29.650558233 |
| 1.392673423  | 5.962529364 | 27.290189266 |
| -0.000041640 | 6.762392093 | 24.950399995 |
| 2.788065662  | 5.184180314 | 29.643997550 |
| 4.184523834  | 5.962923663 | 27.290026546 |
| 2.788888986  | 6.762754433 | 24.950399995 |
| 2.785442219  | 1.956206662 | 30.507488251 |
| 2.388328824  | 2.530871292 | 33.585923910 |
| 0.644762743  | 3.945333593 | 33.761687279 |
| 2.715815330  | 6.271215998 | 32.138106823 |
| 3.676678792  | 6.303353284 | 33.362882137 |
| 1.987359991  | 4.768756208 | 33.748190403 |

|              |             |              |
|--------------|-------------|--------------|
| 2.904402373  | 1.618704267 | 32.424273491 |
| -1.032822812 | 3.830297709 | 32.172650099 |
| -1.464973748 | 4.730962701 | 33.367427588 |
| 1.558745086  | 3.968322545 | 34.153289795 |
| 2.729557767  | 6.270352687 | 33.126068115 |
| 2.869106765  | 1.674688849 | 33.389518261 |
| -1.027612081 | 3.882802486 | 33.159195185 |

Pt(111)\_Volmer

1.0

|               |              |               |
|---------------|--------------|---------------|
| 8.3664999008  | 0.0000000000 | 0.0000000000  |
| -4.1832499504 | 7.2456014549 | 0.0000000000  |
| 0.0000000000  | 0.0000000000 | 60.0000000000 |

Pt O H

27 4 9

Cartesian

|              |             |              |
|--------------|-------------|--------------|
| 0.002162037  | 0.329665925 | 29.611496329 |
| 1.393062769  | 1.134877544 | 27.295539379 |
| 0.000000000  | 1.932112119 | 24.950399995 |
| 2.787867545  | 0.333537194 | 29.617289901 |
| 4.181617265  | 1.132915552 | 27.285981774 |
| 2.788512731  | 1.932184458 | 24.950399995 |
| 5.577703607  | 0.329264986 | 29.628558755 |
| 6.970895971  | 1.132608492 | 27.284874916 |
| 5.577945530  | 1.932257012 | 24.950399995 |
| -1.393304397 | 2.747782640 | 29.620315433 |

|              |             |              |
|--------------|-------------|--------------|
| 0.000065452  | 3.544926306 | 27.297615409 |
| -1.394318950 | 4.347288491 | 24.950399995 |
| 1.390507521  | 2.745758891 | 29.742220044 |
| 2.786015704  | 3.547343923 | 27.298825979 |
| 1.394361213  | 4.347215937 | 24.950399995 |
| 4.182570870  | 2.746407993 | 29.632825255 |
| 5.575446135  | 3.546514946 | 27.283921838 |
| 4.183249950  | 4.347361046 | 24.950399995 |
| -2.789826509 | 5.160284432 | 29.621415138 |
| -1.395230042 | 5.961459187 | 27.282952666 |
| -2.788805457 | 6.762754433 | 24.950399995 |
| -0.000403683 | 5.159569685 | 29.624195695 |
| 1.392784629  | 5.960693047 | 27.285593748 |
| -0.000041640 | 6.762392093 | 24.950399995 |
| 2.789109903  | 5.156135443 | 29.616161585 |
| 4.183204321  | 5.961146944 | 27.280570865 |
| 2.788888986  | 6.762754433 | 24.950399995 |
| -0.825850727 | 3.982657656 | 33.643083572 |
| 1.246262183  | 2.716832137 | 32.818458080 |
| 5.211789456  | 2.838408284 | 32.862503529 |
| -0.821845809 | 6.557973060 | 32.813215256 |
| -0.850089178 | 4.920249820 | 33.290072680 |
| -1.659259388 | 3.543983747 | 33.302063942 |
| 2.024882589  | 3.254040336 | 33.063769341 |
| 0.406390382  | 3.267029736 | 33.094958067 |
| 5.113074431  | 2.901533861 | 31.872600317 |

|              |             |              |
|--------------|-------------|--------------|
| 5.213225162  | 1.878823495 | 33.039093018 |
| -1.733433729 | 6.903902132 | 32.865157127 |
| -0.630723342 | 6.562442066 | 31.836436987 |
| 1.300262739  | 2.728938359 | 31.397942305 |

**Pt(111)\_Heyrovsky**

1.0

|               |              |               |
|---------------|--------------|---------------|
| 8.3664999008  | 0.0000000000 | 0.0000000000  |
| -4.1832499504 | 7.2456014549 | 0.0000000000  |
| 0.0000000000  | 0.0000000000 | 60.0000000000 |

Pt H O

27 10 4

**Cartesian**

|              |             |              |
|--------------|-------------|--------------|
| -0.005526615 | 0.324010352 | 29.611941576 |
| 1.394493177  | 1.140253157 | 27.309195399 |
| 0.000000000  | 1.932112119 | 24.950399995 |
| 2.792863453  | 0.324139050 | 29.612304568 |
| 4.181928068  | 1.132450642 | 27.280592322 |
| 2.788512731  | 1.932184458 | 24.950399995 |
| 5.576883617  | 0.330667111 | 29.615042210 |
| 6.973103451  | 1.132375605 | 27.280722857 |
| 5.577945530  | 1.932257012 | 24.950399995 |
| -1.404736204 | 2.744198323 | 29.609280825 |
| 0.004277696  | 3.544861525 | 27.305499315 |
| -1.394318950 | 4.347288491 | 24.950399995 |
| 1.392718180  | 2.749048888 | 29.732111692 |



|              |             |              |
|--------------|-------------|--------------|
| 2.784237652  | 3.544766082 | 27.305213213 |
| 1.394361213  | 4.347215937 | 24.950399995 |
| 4.191462374  | 2.744420521 | 29.609232545 |
| 5.577479512  | 3.549149794 | 27.273285985 |
| 4.183249950  | 4.347361046 | 24.950399995 |
| -2.789409252 | 5.161560613 | 29.610677361 |
| -1.396108471 | 5.962144567 | 27.273581028 |
| -2.788805457 | 6.762754433 | 24.950399995 |
| -0.005184550 | 5.170781501 | 29.609851241 |
| 1.394100153  | 5.960910710 | 27.280327678 |
| -0.000041640 | 6.762392093 | 24.950399995 |
| 2.792533855  | 5.171016007 | 29.608583450 |
| 4.184782401  | 5.962143271 | 27.273252010 |
| 2.788888986  | 6.762754433 | 24.950399995 |
| 1.429984331  | 2.818194754 | 31.525279284 |
| 0.788116687  | 3.791573087 | 34.255861044 |
| -0.913939705 | 5.090234443 | 34.630690813 |
| 5.239610316  | 0.354939207 | 33.259770870 |
| 6.340050374  | 0.158612285 | 34.333130121 |
| 0.457465668  | 5.907834998 | 34.620273113 |
| 1.336886837  | 2.894782846 | 32.387162447 |
| 2.171692151  | 2.988819410 | 34.219250679 |
| -2.717703739 | 4.875345981 | 33.288967609 |
| -3.002728612 | 5.956570833 | 34.362870455 |
| 0.045549886  | 5.044142525 | 34.902774096 |
| 5.372855323  | 0.182617984 | 34.210306406 |

|              |             |              |
|--------------|-------------|--------------|
| 1.238879317  | 2.927529934 | 33.924794197 |
| -2.600516222 | 5.077484733 | 34.235833883 |

Ir(111)\_Rf\_sur

1.0

|               |              |               |
|---------------|--------------|---------------|
| 8.2730998993  | 0.0000000000 | 0.0000000000  |
| -4.1365499496 | 7.1647146808 | 0.0000000000  |
| 0.0000000000  | 0.0000000000 | 59.9491996765 |

Ir H O

27 8 4

Cartesian

|              |             |              |
|--------------|-------------|--------------|
| -0.006676518 | 0.313981641 | 34.338975452 |
| 1.378947784  | 1.117334763 | 32.175858085 |
| -0.000041298 | 1.910614382 | 29.999776963 |
| 2.762437252  | 0.313802787 | 34.338603834 |
| 4.136183072  | 1.114667834 | 32.166717709 |
| 2.757713856  | 1.910614382 | 29.999776963 |
| 5.519503216  | 0.323954519 | 34.337678362 |
| 6.895728234  | 1.115171539 | 32.165820823 |
| 5.515386290  | 1.910614382 | 29.999776963 |
| -1.382723983 | 2.701236042 | 34.338053554 |
| 0.001990829  | 3.501636725 | 32.174357319 |
| -1.378877639 | 4.298828979 | 29.999776963 |
| 1.383287568  | 2.713369607 | 34.349541555 |
| 2.756781005  | 3.502107975 | 32.173371102 |
| 1.378877515  | 4.298828979 | 29.999776963 |

|              |             |              |
|--------------|-------------|--------------|
| 4.138291879  | 2.701210419 | 34.338074993 |
| 5.515583906  | 3.502970616 | 32.169047469 |
| 4.136549950  | 4.298828979 | 29.999776963 |
| -2.753949738 | 5.101719793 | 34.332572187 |
| -1.377569281 | 5.891555679 | 32.166710563 |
| -2.757713733 | 6.687043149 | 29.999776963 |
| -0.001205667 | 5.097835343 | 34.338600261 |
| 1.378923375  | 5.890933467 | 32.167303722 |
| 0.000041422  | 6.687043149 | 29.999776963 |
| 2.756594731  | 5.097686303 | 34.338518076 |
| 4.136221535  | 5.891266993 | 32.167618168 |
| 2.757713856  | 6.687043149 | 29.999776963 |
| 1.001004339  | 3.401170586 | 38.835236178 |
| -0.721804742 | 4.758098915 | 39.276010952 |
| 2.324142087  | 7.068024520 | 39.003975799 |
| 0.627201581  | 5.598012852 | 39.264469352 |
| 1.442341809  | 2.646544781 | 37.532003738 |
| -2.558761906 | 4.554941705 | 37.964066926 |
| -2.756617784 | 5.649514688 | 39.044303507 |
| 5.367957533  | 0.161709659 | 37.935409455 |
| 0.233563019  | 4.731397169 | 39.555742887 |
| 1.358584100  | 7.141563431 | 38.883735911 |
| 1.462070238  | 2.572952702 | 38.494519573 |
| -2.426096979 | 4.741371356 | 38.911525082 |

**Ir(111)\_Rf\_top**

1.0

|               |              |               |
|---------------|--------------|---------------|
| 8.2730998993  | 0.0000000000 | 0.0000000000  |
| -4.1365499496 | 7.1647146808 | 0.0000000000  |
| 0.0000000000  | 0.0000000000 | 59.9491996765 |

Ir H O

27 9 4

Cartesian

|              |             |              |
|--------------|-------------|--------------|
| -0.020003371 | 0.297433576 | 34.331750339 |
| 1.378906239  | 1.134050578 | 32.190776406 |
| -0.000041298 | 1.910614382 | 29.999776963 |
| 2.777440389  | 0.297033617 | 34.330803428 |
| 4.129980114  | 1.118139859 | 32.164259313 |
| 2.757713856  | 1.910614382 | 29.999776963 |
| 5.518187431  | 0.321826367 | 34.338828949 |
| 6.901734870  | 1.118565735 | 32.163862682 |
| 5.515386290  | 1.910614382 | 29.999776963 |
| -1.405309136 | 2.698661996 | 34.330178109 |
| 0.016776395  | 3.493217215 | 32.189911680 |
| -1.378877639 | 4.298828979 | 29.999776963 |
| 1.382948674  | 2.711690232 | 34.404862623 |
| 2.742133142  | 3.493744409 | 32.188743227 |
| 1.378877515  | 4.298828979 | 29.999776963 |
| 4.162884396  | 2.698253736 | 34.329845797 |
| 5.515712609  | 3.503304570 | 32.157034200 |
| 4.136549950  | 4.298828979 | 29.999776963 |
| -2.755140164 | 5.099608456 | 34.324907564 |

|              |             |              |
|--------------|-------------|--------------|
| -1.378267532 | 5.891230267 | 32.154965287 |
| -2.757713733 | 6.687043149 | 29.999776963 |
| -0.008143797 | 5.120942607 | 34.330685511 |
| 1.378882447  | 5.883658239 | 32.164384376 |
| 0.000041422  | 6.687043149 | 29.999776963 |
| 2.764930350  | 5.121156132 | 34.330596179 |
| 4.136761743  | 5.891198238 | 32.155933638 |
| 2.757713856  | 6.687043149 | 29.999776963 |
| 1.394102200  | 2.726406385 | 36.010667218 |
| 0.997398064  | 3.407315199 | 38.838123365 |
| -0.721610209 | 4.757296914 | 39.269543368 |
| 2.320749947  | 7.063914588 | 39.007874215 |
| 0.627744008  | 5.599144108 | 39.258527036 |
| 1.441121226  | 2.649350287 | 37.539718386 |
| -2.554871442 | 4.557694898 | 37.962151663 |
| -2.749084525 | 5.647439223 | 39.048427038 |
| 5.367630737  | 0.156491719 | 37.934877040 |
| 0.233970825  | 4.732190202 | 39.548346258 |
| 1.355081996  | 7.141060366 | 38.884361230 |
| 1.460601001  | 2.576365260 | 38.508930493 |
| -2.423955811 | 4.737734168 | 38.911339273 |

Ir(111)\_Rf\_fcc

1.0

|               |              |              |
|---------------|--------------|--------------|
| 8.2730998993  | 0.0000000000 | 0.0000000000 |
| -4.1365499496 | 7.1647146808 | 0.0000000000 |

0.0000000000 0.0000000000 59.9491996765

Ir H O

27 9 4

Cartesian

|              |             |              |
|--------------|-------------|--------------|
| -0.008661337 | 0.237839698 | 34.300802415 |
| 1.384738313  | 1.045850604 | 32.137392040 |
| 0.003350594  | 1.839110579 | 29.959013318 |
| 2.758920540  | 0.198156398 | 34.317936152 |
| 4.134732204  | 1.045658431 | 32.137367027 |
| 2.761105625  | 1.839110579 | 29.959013318 |
| 5.527215229  | 0.238767918 | 34.301981587 |
| 6.896000804  | 1.042568936 | 32.128173053 |
| 5.518778059  | 1.839110579 | 29.959013318 |
| -1.378468153 | 2.633684589 | 34.298865713 |
| 0.002638413  | 3.430689795 | 32.127815728 |
| -1.375485623 | 4.227324963 | 29.959013318 |
| 1.322829797  | 2.660711106 | 34.315849374 |
| 2.759962584  | 3.427214460 | 32.142215929 |
| 1.382269408  | 4.227324963 | 29.959013318 |
| 4.192737712  | 2.658297845 | 34.318429261 |
| 5.515730484  | 3.430537552 | 32.128219506 |
| 4.139941842  | 4.227324963 | 29.959013318 |
| -2.772789666 | 5.027908850 | 34.295421099 |
| -1.376793241 | 5.822401293 | 32.130849418 |
| -2.754321717 | 6.615539132 | 29.959013318 |
| 0.017107645  | 5.027082081 | 34.295824876 |

|              |             |              |
|--------------|-------------|--------------|
| 1.381971074  | 5.821813245 | 32.127386938 |
| 0.003433314  | 6.615539132 | 29.959013318 |
| 2.758699347  | 5.048197155 | 34.300881026 |
| 4.137508072  | 5.821076156 | 32.126615116 |
| 2.761105749  | 6.615539132 | 29.959013318 |
| 2.756792717  | 1.841469819 | 35.275574500 |
| 2.414575712  | 2.450533189 | 38.315832023 |
| 0.631046400  | 3.894873585 | 38.429275587 |
| 3.717592882  | 6.235688163 | 38.089848925 |
| 1.986877438  | 4.709343866 | 38.399817708 |
| 3.009261957  | 1.518736930 | 37.210164616 |
| -1.209786101 | 3.725714274 | 37.021253995 |
| -1.477818734 | 4.756816910 | 38.149186327 |
| 2.666192665  | 6.455618627 | 36.970006433 |
| 1.563756999  | 3.891849642 | 38.771893162 |
| 2.755368353  | 6.283065975 | 37.935848964 |
| 2.920282343  | 1.598261699 | 38.170282800 |
| -1.111886465 | 3.866119009 | 37.990598312 |

**Ir(111)\_Volmer**

**1.0**

|               |              |               |
|---------------|--------------|---------------|
| 8.2730998993  | 0.0000000000 | 0.0000000000  |
| -4.1365499496 | 7.1647146808 | 0.0000000000  |
| 0.0000000000  | 0.0000000000 | 59.9491996765 |

**Ir O H**

**27 4 9**

## Cartesian

|              |             |              |
|--------------|-------------|--------------|
| 0.053062907  | 0.283759613 | 34.336395565 |
| 1.378462004  | 1.128692912 | 32.160600304 |
| -0.000041298 | 1.910614382 | 29.999776963 |
| 2.760625978  | 0.382168517 | 34.335881017 |
| 4.133416141  | 1.118722356 | 32.153393057 |
| 2.757714102  | 1.910614382 | 29.999776963 |
| 5.461979866  | 0.288663912 | 34.334147991 |
| 6.899831384  | 1.120902661 | 32.188811119 |
| 5.515386783  | 1.910614382 | 29.999776963 |
| -1.385967079 | 2.775107198 | 34.340619148 |
| 0.009908780  | 3.498797054 | 32.165549256 |
| -1.378877639 | 4.298828979 | 29.999776963 |
| 1.323064767  | 2.678453764 | 34.398459358 |
| 2.745015770  | 3.498046727 | 32.194681970 |
| 1.378877762  | 4.298828979 | 29.999776963 |
| 4.188234831  | 2.671204585 | 34.334662539 |
| 5.516991626  | 3.503855678 | 32.160700355 |
| 4.136549950  | 4.298828979 | 29.999776963 |
| -2.822337055 | 5.062362840 | 34.340558402 |
| -1.380303728 | 5.892794125 | 32.193699326 |
| -2.757713733 | 6.687043149 | 29.999776963 |
| 0.051858951  | 5.075020183 | 34.338071420 |
| 1.379285322  | 5.888925477 | 32.156240938 |
| 0.000041422  | 6.687043149 | 29.999776963 |
| 2.752181597  | 5.168068886 | 34.334151564 |



|              |             |              |
|--------------|-------------|--------------|
| 4.137566507  | 5.895174076 | 32.158124041 |
| 2.757713856  | 6.687043149 | 29.999776963 |
| -0.702358375 | 3.973786496 | 38.435928980 |
| 1.308815094  | 2.728384695 | 37.523999656 |
| -0.705047949 | 6.563518857 | 37.651350313 |
| 5.231548822  | 2.845849143 | 37.673125703 |
| -0.734583329 | 4.920762364 | 38.108079651 |
| -1.553177151 | 3.543468434 | 38.126614102 |
| 2.098022395  | 3.267537587 | 37.734717826 |
| 0.469233119  | 3.275694247 | 37.856008250 |
| -0.547104882 | 6.595067624 | 36.672504722 |
| 1.282798214  | 2.699612396 | 36.194267988 |
| 5.194460150  | 2.898607788 | 36.682188231 |
| 5.199050436  | 1.889051760 | 37.868375270 |
| -1.603252319 | 6.931973563 | 37.763285966 |

**Ir(111)\_Heyrovsky**

1.0

|               |              |               |
|---------------|--------------|---------------|
| 8.2730998993  | 0.0000000000 | 0.0000000000  |
| -4.1365499496 | 7.1647146808 | 0.0000000000  |
| 0.0000000000  | 0.0000000000 | 59.9491996765 |

**Ir H O**

27 10 4

**Cartesian**

|              |             |              |
|--------------|-------------|--------------|
| -0.007888903 | 0.297548452 | 34.331339416 |
| 1.378801761  | 1.127002433 | 32.187839194 |

|              |             |              |
|--------------|-------------|--------------|
| -0.000041298 | 1.910614382 | 29.999776963 |
| 2.778268391  | 0.304280553 | 34.329652841 |
| 4.132980104  | 1.116491659 | 32.163648287 |
| 2.757714102  | 1.910614382 | 29.999776963 |
| 5.499603846  | 0.312320308 | 34.344814144 |
| 6.895299286  | 1.115285882 | 32.169279730 |
| 5.515386783  | 1.910614382 | 29.999776963 |
| -1.398659016 | 2.709468930 | 34.331110727 |
| 0.010226469  | 3.496973763 | 32.186917296 |
| -1.378877515 | 4.298828979 | 29.999776963 |
| 1.359992190  | 2.700560021 | 34.405034139 |
| 2.747134809  | 3.496820879 | 32.192713108 |
| 1.378877762  | 4.298828979 | 29.999776963 |
| 4.175640916  | 2.693896756 | 34.329663561 |
| 5.515344622  | 3.503257808 | 32.152564063 |
| 4.136549950  | 4.298828979 | 29.999776963 |
| -2.776550147 | 5.089033837 | 34.324217927 |
| -1.381279603 | 5.889703135 | 32.156669728 |
| -2.757713733 | 6.687043149 | 29.999776963 |
| -0.000095171 | 5.116062703 | 34.330517568 |
| 1.378688652  | 5.887685323 | 32.164287899 |
| 0.000041422  | 6.687043149 | 29.999776963 |
| 2.766517934  | 5.133121653 | 34.330303173 |
| 4.136051903  | 5.891411336 | 32.151484941 |
| 2.757713856  | 6.687043149 | 29.999776963 |
| 1.582861390  | 2.749249944 | 36.294701347 |

|              |             |              |
|--------------|-------------|--------------|
| 0.796636944  | 3.541292186 | 39.069934434 |
| -0.928772457 | 4.903119636 | 39.289314164 |
| 0.410105651  | 5.763642165 | 39.274252912 |
| 1.335466367  | 2.703169298 | 37.077043159 |
| 2.157360547  | 2.730110405 | 39.046944139 |
| -3.024894941 | 5.733442024 | 39.004061557 |
| 5.505859551  | 4.617243215 | 37.959282343 |
| 5.014920919  | 0.441608951 | 37.958860699 |
| 6.168168406  | 0.231062917 | 38.972788466 |
| 0.025665166  | 4.897028618 | 39.575996072 |
| 1.213317176  | 2.653232815 | 38.801626182 |
| -2.632236892 | 4.846802381 | 38.897435754 |
| 5.197207634  | 0.197884047 | 38.885254543 |

Rh(111)\_Rf\_sur

1.0

|               |              |               |
|---------------|--------------|---------------|
| 8.0700998306  | 0.0000000000 | 0.0000000000  |
| -4.0350499153 | 6.9889114644 | 0.0000000000  |
| 0.0000000000  | 0.0000000000 | 59.8386993408 |

Rh H O

27 8 4

Cartesian

|              |             |              |
|--------------|-------------|--------------|
| -0.001088297 | 0.312617708 | 34.321733495 |
| 1.345031289  | 1.088854701 | 32.163783822 |
| -0.000040285 | 1.863732941 | 30.000131053 |
| 2.691093605  | 0.312456860 | 34.321423195 |

|              |             |              |
|--------------|-------------|--------------|
| 4.034531621  | 1.088169545 | 32.159047292 |
| 2.690046825  | 1.863732941 | 30.000131053 |
| 5.380455299  | 0.311870613 | 34.316247965 |
| 6.725707089  | 1.088248797 | 32.158911758 |
| 5.380053246  | 1.863732941 | 30.000131053 |
| -1.344951877 | 2.639999301 | 34.321144995 |
| 0.000622554  | 3.417370410 | 32.163644722 |
| -1.345043615 | 4.193347045 | 30.000131053 |
| 1.345010185  | 2.642137980 | 34.328431691 |
| 2.689373885  | 3.417313756 | 32.163644722 |
| 1.345043495  | 4.193347045 | 30.000131053 |
| 4.034979567  | 2.640145935 | 34.320617129 |
| 5.380140790  | 3.417086725 | 32.161754390 |
| 4.035049915  | 4.193347045 | 30.000131053 |
| -2.689926947 | 4.971863517 | 34.317243064 |
| -1.344388472 | 5.747540638 | 32.161522557 |
| -2.690046705 | 6.522960733 | 30.000131053 |
| 0.000893967  | 4.971980574 | 34.322107995 |
| 1.344995394  | 5.746411312 | 32.159125758 |
| 0.000040405  | 6.522960733 | 30.000131053 |
| 2.689109086  | 4.971886845 | 34.321811962 |
| 4.034536431  | 5.747580212 | 32.161551090 |
| 2.690046825  | 6.522960733 | 30.000131053 |
| 0.939205964  | 3.364115065 | 38.835372283 |
| -0.785108220 | 4.722390876 | 39.280092536 |
| 6.295510301  | 0.045128821 | 39.003340777 |

|              |             |              |
|--------------|-------------|--------------|
| 0.564721018  | 5.561019877 | 39.268440243 |
| 1.380054444  | 2.609443567 | 37.531720771 |
| 5.445443205  | 4.516163780 | 37.964603265 |
| -2.821712324 | 5.612601437 | 39.043023485 |
| 5.202496680  | 0.305977349 | 37.935691883 |
| 0.171000506  | 4.693497054 | 39.557554061 |
| 5.331499164  | 0.110624581 | 38.883276152 |
| 1.400620860  | 2.536680800 | 38.494923464 |
| -2.484812241 | 4.707823367 | 38.910496935 |

Rh(111)\_Rf\_top

1.0

|               |              |               |
|---------------|--------------|---------------|
| 8.0700998306  | 0.0000000000 | 0.0000000000  |
| -4.0350499153 | 6.9889114644 | 0.0000000000  |
| 0.0000000000  | 0.0000000000 | 59.8386993408 |

Rh H O

27 9 4

Cartesian

|              |             |              |
|--------------|-------------|--------------|
| -0.006559081 | 0.308709303 | 34.317696031 |
| 1.345002549  | 1.100935693 | 32.168288519 |
| -0.000040285 | 1.863732941 | 30.000131053 |
| 2.696492763  | 0.308608155 | 34.317496298 |
| 4.030735989  | 1.090280625 | 32.158469492 |
| 2.690046825  | 1.863732941 | 30.000131053 |
| 5.380412564  | 0.311523062 | 34.308875670 |
| 6.729455582  | 1.090357587 | 32.158394592 |

|              |             |              |
|--------------|-------------|--------------|
| 5.380053246  | 1.863732941 | 30.000131053 |
| -1.352064517 | 2.637228892 | 34.317460631 |
| 0.010561415  | 3.411216815 | 32.166387487 |
| -1.345043615 | 4.193347045 | 30.000131053 |
| 1.345055641  | 2.644985247 | 34.396162648 |
| 2.679437910  | 3.411167034 | 32.166319720 |
| 1.345043495  | 4.193347045 | 30.000131053 |
| 4.041935170  | 2.637308041 | 34.317021931 |
| 5.380085353  | 3.415637264 | 32.162378556 |
| 4.035049915  | 4.193347045 | 30.000131053 |
| -2.689985737 | 4.972077219 | 34.313544433 |
| -1.343362106 | 5.748407523 | 32.161964823 |
| -2.690046705 | 6.522960733 | 30.000131053 |
| -0.000894929 | 4.979793791 | 34.318409364 |
| 1.344962685  | 5.741891510 | 32.158337525 |
| 0.000040405  | 6.522960733 | 30.000131053 |
| 2.690785184  | 4.979697146 | 34.317881497 |
| 4.033460881  | 5.748442515 | 32.161993357 |
| 2.690046825  | 6.522960733 | 30.000131053 |
| 1.339400342  | 2.718761741 | 35.975403186 |
| 0.936338751  | 3.369011656 | 38.843165444 |
| -0.785195765 | 4.722014295 | 39.275819672 |
| 6.293029105  | 0.040568400 | 39.010299339 |
| 0.564424953  | 5.563382671 | 39.264720212 |
| 1.379757537  | 2.609495431 | 37.542484964 |
| 5.450374335  | 4.519991656 | 37.966322397 |

|                     |                    |                     |
|---------------------|--------------------|---------------------|
| <b>-2.813950449</b> | <b>5.610906407</b> | <b>39.050328014</b> |
| <b>5.203256564</b>  | <b>0.298988319</b> | <b>37.939144414</b> |
| <b>0.170315780</b>  | <b>4.696499702</b> | <b>39.555185795</b> |
| <b>5.326790159</b>  | <b>0.112850505</b> | <b>38.885230684</b> |
| <b>1.399025452</b>  | <b>2.539384975</b> | <b>38.512860219</b> |
| <b>-2.484500182</b> | <b>4.703150267</b> | <b>38.913164800</b> |

**Rh(111)\_Rf\_fcc**

**1.0**

|                      |                     |                      |
|----------------------|---------------------|----------------------|
| <b>8.0700998306</b>  | <b>0.0000000000</b> | <b>0.0000000000</b>  |
| <b>-4.0350499153</b> | <b>6.9889114644</b> | <b>0.0000000000</b>  |
| <b>0.0000000000</b>  | <b>0.0000000000</b> | <b>59.8386993408</b> |

**Rh H O**

**27 9 4**

**Cartesian**

|                     |                    |                     |
|---------------------|--------------------|---------------------|
| <b>-0.014667814</b> | <b>0.304471156</b> | <b>34.322264928</b> |
| <b>1.344089581</b>  | <b>1.087774739</b> | <b>32.164333088</b> |
| <b>-0.000040285</b> | <b>1.863732941</b> | <b>30.000131053</b> |
| <b>2.687966178</b>  | <b>0.275577959</b> | <b>34.339063917</b> |
| <b>4.034122938</b>  | <b>1.087799317</b> | <b>32.164832421</b> |
| <b>2.690046825</b>  | <b>1.863732941</b> | <b>30.000131053</b> |
| <b>5.391902911</b>  | <b>0.304833183</b> | <b>34.323056727</b> |
| <b>6.724134950</b>  | <b>1.086462018</b> | <b>32.157627759</b> |
| <b>5.380053246</b>  | <b>1.863732941</b> | <b>30.000131053</b> |
| <b>-1.347052381</b> | <b>2.636403039</b> | <b>34.316461965</b> |
| <b>0.000331660</b>  | <b>3.416568718</b> | <b>32.159856925</b> |

|              |             |              |
|--------------|-------------|--------------|
| -1.345043615 | 4.193347045 | 30.000131053 |
| 1.309018325  | 2.660605223 | 34.338304218 |
| 2.689348511  | 3.416971959 | 32.165506521 |
| 1.345043495  | 4.193347045 | 30.000131053 |
| 4.066123272  | 2.659269278 | 34.340665350 |
| 5.377369300  | 3.416207550 | 32.160152958 |
| 4.035049915  | 4.193347045 | 30.000131053 |
| -2.694247714 | 4.972161366 | 34.316258665 |
| -1.345640796 | 5.748866585 | 32.160252824 |
| -2.690046705 | 6.522960733 | 30.000131053 |
| 0.001259779  | 4.972048892 | 34.317414264 |
| 1.344552378  | 5.746988680 | 32.160548857 |
| 0.000040405  | 6.522960733 | 30.000131053 |
| 2.688674248  | 4.985203806 | 34.324048260 |
| 4.033922175  | 5.746802889 | 32.160131558 |
| 2.690046825  | 6.522960733 | 30.000131053 |
| 2.685048233  | 1.867478544 | 35.265101967 |
| 2.375969842  | 2.470333861 | 38.247439753 |
| 0.630005876  | 3.861231183 | 38.571242949 |
| 3.683089720  | 6.195899551 | 38.227462866 |
| 1.973096689  | 4.696887530 | 38.552314661 |
| 2.875212153  | 1.637245678 | 37.021138493 |
| -1.174344646 | 3.699235658 | 37.136933820 |
| -1.435198053 | 4.723626010 | 38.273051970 |
| 2.636916266  | 6.387804082 | 37.096544912 |
| 1.570251795  | 3.855849495 | 38.894290012 |



|              |             |              |
|--------------|-------------|--------------|
| 2.721893895  | 6.246005614 | 38.064623235 |
| 2.856591625  | 1.628183892 | 37.988332283 |
| -1.085174787 | 3.827603442 | 38.105907376 |

**Rh(111)\_Volmer**

1.0

|               |              |               |
|---------------|--------------|---------------|
| 8.0700998306  | 0.0000000000 | 0.0000000000  |
| -4.0350499153 | 6.9889114644 | 0.0000000000  |
| 0.0000000000  | 0.0000000000 | 59.8386993408 |

**Rh O H**

27 4 9

**Cartesian**

|              |             |              |
|--------------|-------------|--------------|
| -0.009922326 | 0.314760969 | 34.314707166 |
| 1.339104157  | 1.097439512 | 32.154011162 |
| -0.000040285 | 1.863732941 | 30.000131053 |
| 2.683401883  | 0.322899138 | 34.308105270 |
| 4.028330551  | 1.089538086 | 32.151097197 |
| 2.690046825  | 1.863732941 | 30.000131053 |
| 5.374334739  | 0.312391536 | 34.307837770 |
| 6.724927183  | 1.091175942 | 32.157210460 |
| 5.380053246  | 1.863732941 | 30.000131053 |
| -1.351856658 | 2.639067014 | 34.320827562 |
| 0.002195354  | 3.413839758 | 32.160409758 |
| -1.345043736 | 4.193347045 | 30.000131053 |
| 1.337000196  | 2.641713702 | 34.377198693 |
| 2.677773236  | 3.415753279 | 32.154157395 |

|              |             |              |
|--------------|-------------|--------------|
| 1.345043495  | 4.193347045 | 30.000131053 |
| 4.017227572  | 2.634427448 | 34.310537735 |
| 5.375694284  | 3.416870941 | 32.167739253 |
| 4.035049915  | 4.193347045 | 30.000131053 |
| -2.696641156 | 4.971938500 | 34.319201163 |
| -1.348418540 | 5.747510228 | 32.166761987 |
| -2.690046825 | 6.522960733 | 30.000131053 |
| -0.003356766 | 4.971009129 | 34.318894430 |
| 1.340934902  | 5.742976679 | 32.158886792 |
| 0.000040405  | 6.522960733 | 30.000131053 |
| 2.679064522  | 4.973017421 | 34.315748632 |
| 4.030573105  | 5.747792247 | 32.165813254 |
| 2.690046825  | 6.522960733 | 30.000131053 |
| -0.773616882 | 3.982165664 | 38.298739088 |
| 1.314705731  | 2.699190375 | 37.503529856 |
| -0.748590130 | 6.595277560 | 37.502673856 |
| 4.936618225  | 2.827511919 | 37.537416734 |
| -0.810420334 | 4.922370231 | 37.963436966 |
| -1.613588670 | 3.540094899 | 37.990094215 |
| 2.092166167  | 3.268847435 | 37.672404282 |
| 0.479084638  | 3.251364551 | 37.776689983 |
| -0.539710380 | 6.572072024 | 36.529206303 |
| 1.286988660  | 2.657387833 | 36.067865394 |
| 4.926907125  | 2.934718074 | 36.549026257 |
| 4.890281046  | 1.860266857 | 37.673545615 |
| -1.652285850 | 6.966139579 | 37.541343632 |

**Rh(111)\_Heyrovsky**

**1.0**

|                      |                     |                      |
|----------------------|---------------------|----------------------|
| <b>8.0700998306</b>  | <b>0.0000000000</b> | <b>0.0000000000</b>  |
| <b>-4.0350499153</b> | <b>6.9889114644</b> | <b>0.0000000000</b>  |
| <b>0.0000000000</b>  | <b>0.0000000000</b> | <b>59.8386993408</b> |

**Rh H O**

**27 10 4**

**Cartesian**

|                     |                    |                     |
|---------------------|--------------------|---------------------|
| <b>-0.012124761</b> | <b>0.297731184</b> | <b>34.313858300</b> |
| <b>1.343954296</b>  | <b>1.100199195</b> | <b>32.174590815</b> |
| <b>-0.000040285</b> | <b>1.863732941</b> | <b>30.000131053</b> |
| <b>2.699249898</b>  | <b>0.298091467</b> | <b>34.313077200</b> |
| <b>4.032779823</b>  | <b>1.088573515</b> | <b>32.158045059</b> |
| <b>2.690046825</b>  | <b>1.863732941</b> | <b>30.000131053</b> |
| <b>5.378951299</b>  | <b>0.311447975</b> | <b>34.315092366</b> |
| <b>6.725851695</b>  | <b>1.088591532</b> | <b>32.158073592</b> |
| <b>5.380053246</b>  | <b>1.863732941</b> | <b>30.000131053</b> |
| <b>-1.364081876</b> | <b>2.638648152</b> | <b>34.312456601</b> |
| <b>0.008862469</b>  | <b>3.411754817</b> | <b>32.172340250</b> |
| <b>-1.345043736</b> | <b>4.193347045</b> | <b>30.000131053</b> |
| <b>1.340339765</b>  | <b>2.642253370</b> | <b>34.393430583</b> |
| <b>2.678951964</b>  | <b>3.411629637</b> | <b>32.172044217</b> |
| <b>1.345043495</b>  | <b>4.193347045</b> | <b>30.000131053</b> |
| <b>4.050634575</b>  | <b>2.638783121</b> | <b>34.311746835</b> |
| <b>5.379183089</b>  | <b>3.416675152</b> | <b>32.149581364</b> |

|              |             |              |
|--------------|-------------|--------------|
| 4.035049915  | 4.193347045 | 30.000131053 |
| -2.691173048 | 4.971701055 | 34.305997371 |
| -1.345192490 | 5.747734760 | 32.148818098 |
| -2.690046825 | 6.522960733 | 30.000131053 |
| -0.008407909 | 4.988139802 | 34.312670601 |
| 1.344223845  | 5.745336557 | 32.157563559 |
| 0.000040405  | 6.522960733 | 30.000131053 |
| 2.695867834  | 4.987719065 | 34.312124901 |
| 4.033588590  | 5.747751423 | 32.149103431 |
| 2.690046825  | 6.522960733 | 30.000131053 |
| 1.437889455  | 2.750298709 | 36.196308113 |
| 0.767226591  | 3.528560031 | 38.905239672 |
| -0.947065395 | 4.878875575 | 39.207532315 |
| 0.400792642  | 5.727113217 | 39.184003029 |
| 1.294894510  | 2.691688545 | 37.022144292 |
| 2.135458518  | 2.713610833 | 38.884913251 |
| -3.039086716 | 5.746376320 | 38.973163229 |
| 5.257407057  | 4.618865338 | 37.932974085 |
| 4.884364256  | 0.604848091 | 37.917152361 |
| 6.028259047  | 0.412556694 | 38.946666479 |
| 0.018005851  | 4.849045300 | 39.456581791 |
| 1.198314307  | 2.650582511 | 38.606652793 |
| -2.652908751 | 4.857675414 | 38.864865031 |
| 5.061913381  | 0.339705145 | 38.838339747 |

Pd(111)\_Rf\_sur

1.0

|               |              |               |
|---------------|--------------|---------------|
| 8.2524003983  | 0.0000000000 | 0.0000000000  |
| -4.1262001991 | 7.1467883871 | 0.0000000000  |
| 0.0000000000  | 0.0000000000 | 59.9379005432 |

Pd H O

27 8 4

Cartesian

|              |             |              |
|--------------|-------------|--------------|
| 0.001024835  | 0.318560013 | 34.602114984 |
| 1.375526275  | 1.112446741 | 32.300878633 |
| -0.000041195 | 1.905833978 | 30.000117436 |
| 2.750143292  | 0.318448672 | 34.601761299 |
| 4.125861416  | 1.111598398 | 32.299267401 |
| 2.750813987  | 1.905833978 | 30.000117436 |
| 5.502071406  | 0.316984546 | 34.595880836 |
| 6.877592393  | 1.111719590 | 32.299424594 |
| 5.501586657  | 1.905833978 | 30.000117436 |
| -1.373893767 | 2.699526431 | 34.601325444 |
| 0.000985115  | 3.493441673 | 32.301414520 |
| -1.375427653 | 4.288073203 | 30.000117436 |
| 1.375321037  | 2.699753692 | 34.615737221 |
| 2.749805385  | 3.493288319 | 32.301385939 |
| 1.375427530  | 4.288073203 | 30.000117436 |
| 4.125093958  | 2.699461895 | 34.599807099 |
| 5.501779228  | 3.493149023 | 32.300071231 |
| 4.126200199  | 4.288073203 | 30.000117436 |
| -2.750642259 | 5.082282585 | 34.596781126 |

|              |             |              |
|--------------|-------------|--------------|
| -1.374435036 | 5.876298571 | 32.300628553 |
| -2.750813864 | 6.670312001 | 30.000117436 |
| 0.000687158  | 5.080806132 | 34.603640474 |
| 1.375417200  | 5.875263009 | 32.299674675 |
| 0.000041318  | 6.670312001 | 30.000117436 |
| 2.750271196  | 5.080807410 | 34.602843790 |
| 4.125563459  | 5.876298145 | 32.300557101 |
| 2.750813987  | 6.670312001 | 30.000117436 |
| 0.952399078  | 3.461469823 | 39.052124377 |
| -0.775353011 | 4.831308175 | 39.510836153 |
| 6.403902096  | 0.000531037 | 39.213833515 |
| 0.576585338  | 5.663958154 | 39.497828400 |
| 1.390580797  | 2.709836894 | 37.745900813 |
| -2.620426064 | 4.616683218 | 38.186242397 |
| -2.826415574 | 5.722785386 | 39.252710300 |
| 5.302993832  | 0.263861024 | 38.156189877 |
| 0.181015058  | 4.797565306 | 39.786771304 |
| 5.438428871  | 0.058446777 | 39.099207373 |
| 1.413137617  | 2.635763561 | 38.708792556 |
| -2.477476296 | 4.821394727 | 39.128902635 |

**Pd(111)\_Rf\_top**

**1.0**

|               |              |               |
|---------------|--------------|---------------|
| 8.2524003983  | 0.0000000000 | 0.0000000000  |
| -4.1262001991 | 7.1467883871 | 0.0000000000  |
| 0.0000000000  | 0.0000000000 | 59.9379005432 |

**Pd H O**

**27 9 4**

**Cartesian**

|                     |                    |                     |
|---------------------|--------------------|---------------------|
| <b>-0.001814166</b> | <b>0.313240300</b> | <b>34.601218267</b> |
| <b>1.375284638</b>  | <b>1.112962179</b> | <b>32.308230997</b> |
| <b>-0.000041195</b> | <b>1.905833978</b> | <b>30.000117436</b> |
| <b>2.752349472</b>  | <b>0.313184656</b> | <b>34.598813922</b> |
| <b>4.125422166</b>  | <b>1.111682742</b> | <b>32.297131000</b> |
| <b>2.750813987</b>  | <b>1.905833978</b> | <b>30.000117436</b> |
| <b>5.502027967</b>  | <b>0.317104087</b> | <b>34.599303365</b> |
| <b>6.878218620</b>  | <b>1.111981036</b> | <b>32.296755879</b> |
| <b>5.501586657</b>  | <b>1.905833978</b> | <b>30.000117436</b> |
| <b>-1.379361413</b> | <b>2.699823127</b> | <b>34.599010414</b> |
| <b>0.000870384</b>  | <b>3.493323889</b> | <b>32.305137145</b> |
| <b>-1.375427653</b> | <b>4.288073203</b> | <b>30.000117436</b> |
| <b>1.375622807</b>  | <b>2.698786288</b> | <b>34.636772556</b> |
| <b>2.750325180</b>  | <b>3.493631874</b> | <b>32.303508050</b> |
| <b>1.375427530</b>  | <b>4.288073203</b> | <b>30.000117436</b> |
| <b>4.129926816</b>  | <b>2.700048685</b> | <b>34.596763263</b> |
| <b>5.501865554</b>  | <b>3.492787365</b> | <b>32.300006925</b> |
| <b>4.126200199</b>  | <b>4.288073203</b> | <b>30.000117436</b> |
| <b>-2.750845283</b> | <b>5.082383968</b> | <b>34.598771051</b> |
| <b>-1.374304196</b> | <b>5.876439997</b> | <b>32.299713973</b> |
| <b>-2.750813864</b> | <b>6.670312001</b> | <b>30.000117436</b> |
| <b>-0.002544257</b> | <b>5.084785654</b> | <b>34.602257887</b> |
| <b>1.375352764</b>  | <b>5.875139475</b> | <b>32.297206024</b> |

|              |             |              |
|--------------|-------------|--------------|
| 0.000041318  | 6.670312001 | 30.000117436 |
| 2.753219533  | 5.084723886 | 34.600828856 |
| 4.125224798  | 5.876728813 | 32.299781852 |
| 2.750813987  | 6.670312001 | 30.000117436 |
| 1.412003707  | 2.770623217 | 36.179918727 |
| 0.948253133  | 3.471942372 | 39.071205512 |
| -0.776748847 | 4.829678795 | 39.503483789 |
| 2.271541973  | 7.139179074 | 39.228573968 |
| 0.573043792  | 5.670174080 | 39.492180155 |
| 1.392970111  | 2.704362176 | 37.776707146 |
| -2.613171601 | 4.623881458 | 38.188289483 |
| -2.811532226 | 5.719183710 | 39.267997359 |
| 5.304736169  | 0.252317610 | 38.159958946 |
| 0.178569178  | 4.804224254 | 39.784359814 |
| 5.432367189  | 0.058957496 | 39.105527262 |
| 1.409636282  | 2.641322836 | 38.743032137 |
| -2.474228710 | 4.813557089 | 39.133739905 |

**Pd(111)\_Rf\_fcc**

**1.0**

|               |              |               |
|---------------|--------------|---------------|
| 8.2524003983  | 0.0000000000 | 0.0000000000  |
| -4.1262001991 | 7.1467883871 | 0.0000000000  |
| 0.0000000000  | 0.0000000000 | 59.9379005432 |

**Pd H O**

**27 9 4**

**Cartesian**



|              |             |              |
|--------------|-------------|--------------|
| -0.009482843 | 0.318354557 | 34.617477066 |
| 1.375628217  | 1.114275055 | 32.311217672 |
| -0.000041195 | 1.905833978 | 30.000117436 |
| 2.750421620  | 0.297245562 | 34.646079120 |
| 4.126427387  | 1.114327557 | 32.310660350 |
| 2.750813987  | 1.905833978 | 30.000117436 |
| 5.510651370  | 0.318275138 | 34.618016525 |
| 6.876888695  | 1.115543735 | 32.304994242 |
| 5.501586657  | 1.905833978 | 30.000117436 |
| -1.375907268 | 2.703971764 | 34.622410795 |
| -0.001627267 | 3.497177959 | 32.313443388 |
| -1.375427653 | 4.288073203 | 30.000117436 |
| 1.351990980  | 2.719604656 | 34.640177222 |
| 2.751145515  | 3.495142618 | 32.307716546 |
| 1.375427530  | 4.288073203 | 30.000117436 |
| 4.149501728  | 2.719258759 | 34.637312015 |
| 5.503676169  | 3.497822469 | 32.313446960 |
| 4.126200199  | 4.288073203 | 30.000117436 |
| -2.750833586 | 5.088078919 | 34.620567345 |
| -1.375348337 | 5.878508138 | 32.314207919 |
| -2.750813864 | 6.670312001 | 30.000117436 |
| -0.000080177 | 5.088008206 | 34.620553055 |
| 1.374473526  | 5.878331356 | 32.306366112 |
| 0.000041318  | 6.670312001 | 30.000117436 |
| 2.751021561  | 5.097425385 | 34.619909991 |
| 4.128090499  | 5.877860220 | 32.307077055 |

|              |             |              |
|--------------|-------------|--------------|
| 2.750813987  | 6.670312001 | 30.000117436 |
| 2.752739457  | 1.912371946 | 35.446368581 |
| 2.265234578  | 2.556972266 | 38.570948235 |
| 0.514437353  | 3.975996818 | 38.692991047 |
| 3.533297926  | 6.378405429 | 38.220514130 |
| 1.856138544  | 4.799489040 | 38.666078822 |
| 2.786851370  | 1.639642754 | 37.407356245 |
| -1.104068124 | 3.907429513 | 37.022964794 |
| -1.623352230 | 4.711919113 | 38.252238616 |
| 2.605666920  | 6.270950246 | 36.971573270 |
| 1.420251697  | 4.020556643 | 39.109135565 |
| 2.600185886  | 6.263361806 | 37.962402568 |
| 2.736733760  | 1.693700801 | 38.371798487 |
| -1.108202510 | 3.919204501 | 38.011779158 |

**Pd(111)\_Volmer**

1.0

|               |              |               |
|---------------|--------------|---------------|
| 8.2524003983  | 0.0000000000 | 0.0000000000  |
| -4.1262001991 | 7.1467883871 | 0.0000000000  |
| 0.0000000000  | 0.0000000000 | 59.9379005432 |

**Pd O H**

27 4 9

**Cartesian**

|              |             |              |
|--------------|-------------|--------------|
| -0.007061296 | 0.317318729 | 34.591518720 |
| 1.368478844  | 1.114676755 | 32.295476897 |
| -0.000041195 | 1.905833978 | 30.000117436 |

|              |             |              |
|--------------|-------------|--------------|
| 2.742506264  | 0.321238134 | 34.571451553 |
| 4.122812919  | 1.111688387 | 32.286452566 |
| 2.750813987  | 1.905833978 | 30.000117436 |
| 5.494064053  | 0.317666144 | 34.594569701 |
| 6.874315295  | 1.113064308 | 32.296770169 |
| 5.501587149  | 1.905833978 | 30.000117436 |
| -1.380878513 | 2.699949857 | 34.595398539 |
| -0.004169679 | 3.493020377 | 32.299867594 |
| -1.375427653 | 4.288073629 | 30.000117436 |
| 1.367170686  | 2.698703860 | 34.663563313 |
| 2.742687615  | 3.495741548 | 32.296330742 |
| 1.375427530  | 4.288073629 | 30.000117436 |
| 4.113639516  | 2.698685756 | 34.579257634 |
| 5.498308636  | 3.493075541 | 32.295705541 |
| 4.126199953  | 4.288073629 | 30.000117436 |
| -2.757709227 | 5.082028274 | 34.593715855 |
| -1.377922106 | 5.875087931 | 32.293626301 |
| -2.750813987 | 6.670312427 | 30.000117436 |
| -0.005489396 | 5.079399540 | 34.594573273 |
| 1.371245308  | 5.874504336 | 32.297859806 |
| 0.000041318  | 6.670312427 | 30.000117436 |
| 2.744251552  | 5.080475144 | 34.593280000 |
| 4.120942725  | 5.876956713 | 32.297066693 |
| 2.750814233  | 6.670312427 | 30.000117436 |
| -0.797374295 | 4.056867756 | 38.554071380 |
| 1.439661829  | 2.741496925 | 37.972784477 |

|                     |                    |                     |
|---------------------|--------------------|---------------------|
| <b>-0.736520573</b> | <b>6.635482027</b> | <b>37.627094755</b> |
| <b>5.148808706</b>  | <b>2.867358568</b> | <b>37.664156672</b> |
| <b>-0.799708149</b> | <b>4.975217175</b> | <b>38.165960875</b> |
| <b>-1.603255125</b> | <b>3.606971782</b> | <b>38.177618195</b> |
| <b>2.169712809</b>  | <b>3.388701485</b> | <b>37.990654509</b> |
| <b>0.593930306</b>  | <b>3.278092546</b> | <b>38.139245143</b> |
| <b>-0.529157396</b> | <b>6.611460488</b> | <b>36.652595708</b> |
| <b>1.376588001</b>  | <b>2.656498011</b> | <b>36.227712666</b> |
| <b>5.095779342</b>  | <b>2.963997860</b> | <b>36.673470277</b> |
| <b>5.132408274</b>  | <b>1.901765426</b> | <b>37.808424487</b> |
| <b>-1.637454716</b> | <b>7.012536394</b> | <b>37.661162852</b> |

**Pd(111)\_Heyrovsky**

**1.0**

|                      |                     |                      |
|----------------------|---------------------|----------------------|
| <b>8.2524003983</b>  | <b>0.0000000000</b> | <b>0.0000000000</b>  |
| <b>-4.1262001991</b> | <b>7.1467883871</b> | <b>0.0000000000</b>  |
| <b>0.0000000000</b>  | <b>0.0000000000</b> | <b>59.9379005432</b> |

**Pd H O**

**27 10 4**

**Cartesian**

|                     |                    |                     |
|---------------------|--------------------|---------------------|
| <b>-0.004559725</b> | <b>0.311809773</b> | <b>34.590954252</b> |
| <b>1.375638670</b>  | <b>1.122390008</b> | <b>32.317162441</b> |
| <b>-0.000041195</b> | <b>1.905833978</b> | <b>30.000117436</b> |
| <b>2.754983328</b>  | <b>0.311745130</b> | <b>34.590964970</b> |
| <b>4.127862389</b>  | <b>1.111227794</b> | <b>32.293612011</b> |
| <b>2.750813987</b>  | <b>1.905833978</b> | <b>30.000117436</b> |

|              |             |              |
|--------------|-------------|--------------|
| 5.502127803  | 0.319067038 | 34.593787306 |
| 6.875864291  | 1.111438655 | 32.293526269 |
| 5.501587149  | 1.905833978 | 30.000117436 |
| -1.384312091 | 2.700722588 | 34.590150422 |
| 0.007563168  | 3.490591003 | 32.314993886 |
| -1.375427653 | 4.288073629 | 30.000117436 |
| 1.374199548  | 2.703000526 | 34.687974733 |
| 2.744061440  | 3.490680885 | 32.312293018 |
| 1.375427530  | 4.288073629 | 30.000117436 |
| 4.134322391  | 2.700917475 | 34.588739254 |
| 5.502012872  | 3.494990116 | 32.290871844 |
| 4.126199953  | 4.288073629 | 30.000117436 |
| -2.750646118 | 5.084150941 | 34.592686952 |
| -1.375464298 | 5.876790580 | 32.290932578 |
| -2.750813987 | 6.670312427 | 30.000117436 |
| -0.004903074 | 5.091989006 | 34.592072469 |
| 1.375383260  | 5.878304519 | 32.293601293 |
| 0.000041318  | 6.670312427 | 30.000117436 |
| 2.755315932  | 5.091484217 | 34.589393036 |
| 4.127043530  | 5.877025722 | 32.290561030 |
| 2.750814233  | 6.670312427 | 30.000117436 |
| 1.447831118  | 2.779459357 | 36.427523340 |
| 0.828808344  | 3.668351497 | 39.095791989 |
| -0.853761979 | 4.927901675 | 39.472045109 |
| 0.494429832  | 5.783953388 | 39.447251423 |
| 1.358725082  | 2.805801644 | 37.298228300 |

|              |             |              |
|--------------|-------------|--------------|
| 2.188469477  | 2.806237850 | 39.080812172 |
| -2.929356819 | 5.786119079 | 39.264364047 |
| -2.697335414 | 4.684859898 | 38.197070878 |
| 5.046921531  | 0.489378043 | 38.194177091 |
| 6.181362055  | 0.307308823 | 39.237055267 |
| 0.115111560  | 4.900414774 | 39.714715993 |
| 1.261180083  | 2.788076542 | 38.763538730 |
| -2.539005432 | 4.901852037 | 39.134132888 |
| 5.217524614  | 0.222472474 | 39.115805567 |

Ni(111)\_Rf\_sur

1.0

|               |              |               |
|---------------|--------------|---------------|
| 7.4579000473  | 0.0000000000 | 0.0000000000  |
| -3.7289500237 | 6.4587308998 | 0.0000000000  |
| 0.0000000000  | 0.0000000000 | 59.5055007935 |

Ni H O

27 8 4

Cartesian

|              |             |              |
|--------------|-------------|--------------|
| -0.000284427 | 0.285485189 | 34.010600213 |
| 1.243105456  | 1.005210835 | 32.007326165 |
| -0.000037229 | 1.722349696 | 30.000292505 |
| 2.486321918  | 0.286153113 | 34.010369671 |
| 3.728833947  | 1.004521738 | 32.003364385 |
| 2.485979203  | 1.722349696 | 30.000292505 |
| 4.972094612  | 0.285369746 | 34.006258925 |
| 6.215629632  | 1.004378336 | 32.003130296 |

|              |             |              |
|--------------|-------------|--------------|
| 4.971921066  | 1.722349696 | 30.000292505 |
| -1.243451075 | 2.438751627 | 34.010625041 |
| 0.001134540  | 3.156655135 | 32.007751782 |
| -1.243008272 | 3.875238694 | 30.000292505 |
| 1.243203530  | 2.439030923 | 34.018662099 |
| 2.485642031  | 3.156863212 | 32.006822519 |
| 1.243008161  | 3.875238694 | 30.000292505 |
| 3.728483272  | 2.439186836 | 34.009653216 |
| 4.971663464  | 3.156920572 | 32.003917686 |
| 3.728950024  | 3.875238694 | 30.000292505 |
| -2.486540306 | 4.591430624 | 34.007223655 |
| -1.242488844 | 5.309776078 | 32.005531482 |
| -2.485979092 | 6.028127307 | 30.000292505 |
| 0.000569437  | 4.591540726 | 34.013331252 |
| 1.243360892  | 5.309040785 | 32.004403599 |
| 0.000037340  | 6.028127307 | 30.000292505 |
| 2.486113450  | 4.591009851 | 34.011281200 |
| 3.728731762  | 5.309409587 | 32.004375224 |
| 2.485979203  | 6.028127307 | 30.000292505 |
| 0.769730325  | 3.247026735 | 38.493171999 |
| -0.953669969 | 4.603066738 | 38.945272495 |
| 5.816797201  | 0.460919046 | 38.669824131 |
| 0.395303843  | 5.442559285 | 38.933454543 |
| 1.207934433  | 2.500730123 | 37.184628231 |
| 4.662582673  | 4.397810936 | 37.629475512 |
| -2.986589063 | 5.492735937 | 38.709952674 |

|             |             |              |
|-------------|-------------|--------------|
| 4.725756940 | 0.719700791 | 37.599544031 |
| 0.003081006 | 4.573874436 | 39.220735046 |
| 4.850910117 | 0.521398467 | 38.543724600 |
| 1.226931230 | 2.420252454 | 38.146415136 |
| 4.809017146 | 4.586827918 | 38.571872038 |

**Ni(111)\_Rf\_top**

**1.0**

|               |              |               |
|---------------|--------------|---------------|
| 7.4579000473  | 0.0000000000 | 0.0000000000  |
| -3.7289500237 | 6.4587308998 | 0.0000000000  |
| 0.0000000000  | 0.0000000000 | 59.5055007935 |

**Ni H O**

**27 9 4**

**Cartesian**

|              |             |              |
|--------------|-------------|--------------|
| -0.002255897 | 0.281500818 | 34.006634886 |
| 1.243299047  | 1.014523845 | 32.007510599 |
| -0.000037229 | 1.722349696 | 30.000292505 |
| 2.487885190  | 0.282044541 | 34.006709369 |
| 3.726852030  | 1.005886458 | 32.002608916 |
| 2.485979203  | 1.722349696 | 30.000292505 |
| 4.972038838  | 0.285822063 | 34.002935569 |
| 6.217803584  | 1.005780783 | 32.002172659 |
| 4.971921066  | 1.722349696 | 30.000292505 |
| -1.247034339 | 2.438808025 | 34.007007300 |
| 0.008635241  | 3.152246647 | 32.005123600 |
| -1.243008272 | 3.875238694 | 30.000292505 |



|              |             |              |
|--------------|-------------|--------------|
| 1.243186415  | 2.439621853 | 34.072825347 |
| 2.478404156  | 3.152403908 | 32.003754533 |
| 1.243008161  | 3.875238694 | 30.000292505 |
| 3.731454036  | 2.439222253 | 34.006312127 |
| 4.971710472  | 3.156403365 | 32.006102518 |
| 3.728950024  | 3.875238694 | 30.000292505 |
| -2.486511717 | 4.591921076 | 34.009890852 |
| -1.241548783 | 5.309975108 | 32.007272963 |
| -2.485979092 | 6.028127307 | 30.000292505 |
| -0.001917905 | 4.593765084 | 34.011157061 |
| 1.243480247  | 5.306863778 | 32.003903499 |
| 0.000037340  | 6.028127307 | 30.000292505 |
| 2.487911111  | 4.592849240 | 34.009493610 |
| 3.727850268  | 5.309637489 | 32.006609711 |
| 2.485979203  | 6.028127307 | 30.000292505 |
| 1.253318151  | 2.532710958 | 35.549618867 |
| 0.765248174  | 3.253853030 | 38.507036457 |
| -0.954255520 | 4.603176840 | 38.940480762 |
| 5.814293134  | 0.451705262 | 38.679077743 |
| 0.395369411  | 5.445187093 | 38.929138082 |
| 1.208412520  | 2.497310816 | 37.203592993 |
| 4.670313415  | 4.403401475 | 37.632231379 |
| -2.979199980 | 5.491221464 | 38.719521952 |
| 4.727063511  | 0.708890630 | 37.604920986 |
| 0.001767656  | 4.577709895 | 39.218457998 |
| 4.849849368  | 0.525277621 | 38.553332893 |

|             |             |              |
|-------------|-------------|--------------|
| 1.226469479 | 2.424440354 | 38.171686116 |
| 4.805289133 | 4.583488300 | 38.580455305 |

Ni(111)\_Rf\_fcc

1.0

|               |              |               |
|---------------|--------------|---------------|
| 7.4579000473  | 0.0000000000 | 0.0000000000  |
| -3.7289500237 | 6.4587308998 | 0.0000000000  |
| 0.0000000000  | 0.0000000000 | 59.5055007935 |

Ni H O

27 9 4

Cartesian

|              |             |              |
|--------------|-------------|--------------|
| -0.011550953 | 0.278310569 | 34.001811232 |
| 1.243777801  | 1.004955022 | 32.001140539 |
| -0.000037229 | 1.722349696 | 30.000292505 |
| 2.482540146  | 0.274883058 | 34.038073759 |
| 3.727249325  | 1.005135958 | 32.000409897 |
| 2.485979203  | 1.722349696 | 30.000292505 |
| 4.981154652  | 0.279017447 | 33.998317630 |
| 6.215367751  | 1.005262324 | 31.997146837 |
| 4.971921066  | 1.722349696 | 30.000292505 |
| -1.246672259 | 2.437563609 | 34.002148179 |
| 0.001941687  | 3.155957762 | 32.009737992 |
| -1.243008272 | 3.875238694 | 30.000292505 |
| 1.231580411  | 2.442094325 | 34.039691101 |
| 2.485902078  | 3.156099431 | 32.002750788 |
| 1.243008161  | 3.875238694 | 30.000292505 |

|              |             |              |
|--------------|-------------|--------------|
| 3.731958794  | 2.442079118 | 34.041861746 |
| 4.967291667  | 3.155291185 | 32.009982722 |
| 3.728950024  | 3.875238694 | 30.000292505 |
| -2.489331939 | 4.589980826 | 34.004162763 |
| -1.243698509 | 5.311771765 | 32.009862130 |
| -2.485979092 | 6.028127307 | 30.000292505 |
| -0.000480532 | 4.592130115 | 34.006131240 |
| 1.241991309  | 5.308390185 | 31.999203984 |
| 0.000037340  | 6.028127307 | 30.000292505 |
| 2.485330641  | 4.602076979 | 34.004240793 |
| 3.729529018  | 5.308477573 | 31.998448514 |
| 2.485979203  | 6.028127307 | 30.000292505 |
| 2.476703068  | 1.715245068 | 34.938688931 |
| 1.960765899  | 2.416008541 | 38.133799153 |
| 0.238321447  | 3.772490874 | 38.568240111 |
| 3.281192840  | 6.095489806 | 38.292142682 |
| 1.587780792  | 4.610333824 | 38.556471814 |
| 2.402209710  | 1.663431137 | 36.832405743 |
| -1.616728041 | 3.564289664 | 37.248442333 |
| -1.799845952 | 4.661175704 | 38.331923638 |
| 2.191419948  | 6.360815998 | 37.218024940 |
| 1.196495681  | 3.739481206 | 38.836413979 |
| 2.315992436  | 6.142179781 | 38.160534964 |
| 2.419576376  | 1.585572517 | 37.795558167 |
| -1.450950403 | 3.761225102 | 38.188771072 |

Ni(111)\_Volmer

1.0

|               |              |               |
|---------------|--------------|---------------|
| 7.4579000473  | 0.0000000000 | 0.0000000000  |
| -3.7289500237 | 6.4587308998 | 0.0000000000  |
| 0.0000000000  | 0.0000000000 | 59.5055007935 |

Ni O H

27 4 9

Cartesian

|              |             |              |
|--------------|-------------|--------------|
| -0.005326999 | 0.290592736 | 34.006627792 |
| 1.236044224  | 1.012407567 | 31.991791163 |
| -0.000037229 | 1.722349696 | 30.000292505 |
| 2.474822655  | 0.292916369 | 33.977976708 |
| 3.725372038  | 1.004202116 | 31.990003573 |
| 2.485978981  | 1.722349696 | 30.000292505 |
| 4.960287084  | 0.289361961 | 34.005421879 |
| 6.212069094  | 1.007457137 | 32.004822121 |
| 4.971921066  | 1.722349696 | 30.000292505 |
| -1.251256303 | 2.443308714 | 34.015608301 |
| -0.001501385 | 3.156880921 | 32.000675907 |
| -1.243008272 | 3.875238694 | 30.000292505 |
| 1.229761523  | 2.442689296 | 34.037591393 |
| 2.477096584  | 3.158219655 | 31.992426041 |
| 1.243007938  | 3.875238694 | 30.000292505 |
| 3.716411182  | 2.440299593 | 33.978522916 |
| 4.969699217  | 3.159088533 | 32.002424482 |
| 3.728950024  | 3.875238694 | 30.000292505 |

|              |             |              |
|--------------|-------------|--------------|
| -2.494228277 | 4.591973047 | 34.014618742 |
| -1.247158139 | 5.308492202 | 32.002552167 |
| -2.485979092 | 6.028127307 | 30.000292505 |
| -0.008369748 | 4.595178310 | 34.012487113 |
| 1.239383500  | 5.309150501 | 32.005336408 |
| 0.000037118  | 6.028127307 | 30.000292505 |
| 2.479275759  | 4.590537878 | 34.007638632 |
| 3.725415157  | 5.311195849 | 32.007840452 |
| 2.485979203  | 6.028127307 | 30.000292505 |
| -0.915265745 | 3.716334478 | 37.908694129 |
| 1.148517935  | 2.377874724 | 37.064827824 |
| -0.827750680 | 6.391021158 | 37.094404625 |
| 4.092895150  | 2.596012020 | 37.161350555 |
| -0.963809262 | 4.659114573 | 37.598657330 |
| -1.766835809 | 3.281564736 | 37.633252859 |
| 1.991073869  | 2.861014259 | 37.235202113 |
| 0.356071135  | 2.961363329 | 37.378336945 |
| -0.673356533 | 6.238117475 | 36.118838386 |
| 1.079770624  | 2.413782257 | 35.608052467 |
| 4.175240606  | 2.753152686 | 36.181279874 |
| 3.924699043  | 1.622154230 | 37.225423574 |
| 2.041181309  | 0.409902052 | 37.123374922 |

Ni(111)\_Heyrovsky

1.0

|              |              |              |
|--------------|--------------|--------------|
| 7.4579000473 | 0.0000000000 | 0.0000000000 |
|--------------|--------------|--------------|

|                      |                     |                      |
|----------------------|---------------------|----------------------|
| <b>-3.7289500237</b> | <b>6.4587308998</b> | <b>0.0000000000</b>  |
| <b>0.0000000000</b>  | <b>0.0000000000</b> | <b>59.5055007935</b> |

**Ni H O**

**27 10 4**

**Cartesian**

|                     |                    |                     |
|---------------------|--------------------|---------------------|
| <b>-0.008360274</b> | <b>0.275870338</b> | <b>33.997877826</b> |
| <b>1.243301214</b>  | <b>1.018486634</b> | <b>32.019775448</b> |
| <b>-0.000037229</b> | <b>1.722349696</b> | <b>30.000292505</b> |
| <b>2.492937111</b>  | <b>0.276657458</b> | <b>33.997292604</b> |
| <b>3.728277957</b>  | <b>1.005086682</b> | <b>31.998554918</b> |
| <b>2.485978981</b>  | <b>1.722349696</b> | <b>30.000292505</b> |
| <b>4.971433589</b>  | <b>0.286889634</b> | <b>34.006255378</b> |
| <b>6.216130890</b>  | <b>1.005125468</b> | <b>31.998867037</b> |
| <b>4.971921066</b>  | <b>1.722349696</b> | <b>30.000292505</b> |
| <b>-1.257911502</b> | <b>2.437849642</b> | <b>33.996026395</b> |
| <b>0.010563037</b>  | <b>3.151835884</b> | <b>32.016913177</b> |
| <b>-1.243008272</b> | <b>3.875238694</b> | <b>30.000292505</b> |
| <b>1.240134303</b>  | <b>2.440958855</b> | <b>34.092244100</b> |
| <b>2.475694773</b>  | <b>3.152058974</b> | <b>32.015388051</b> |
| <b>1.243007938</b>  | <b>3.875238694</b> | <b>30.000292505</b> |
| <b>3.740036823</b>  | <b>2.438030578</b> | <b>33.994526096</b> |
| <b>4.971172263</b>  | <b>3.159446748</b> | <b>31.992958061</b> |
| <b>3.728950024</b>  | <b>3.875238694</b> | <b>30.000292505</b> |
| <b>-2.487122773</b> | <b>4.592510081</b> | <b>34.000364136</b> |
| <b>-1.244651016</b> | <b>5.309729112</b> | <b>31.993170870</b> |
| <b>-2.485979092</b> | <b>6.028127307</b> | <b>30.000292505</b> |

|              |             |              |
|--------------|-------------|--------------|
| -0.006567642 | 4.605883566 | 33.996093784 |
| 1.243208864  | 5.309513529 | 31.998671963 |
| 0.000037118  | 6.028127307 | 30.000292505 |
| 2.491050794  | 4.604511532 | 33.995554670 |
| 3.730050669  | 5.309337212 | 31.993259540 |
| 2.485979203  | 6.028127307 | 30.000292505 |
| 1.300376841  | 2.533467617 | 35.755425730 |
| 0.667120507  | 3.392560545 | 38.419373643 |
| -1.024708919 | 4.677248987 | 38.745605150 |
| 0.323214923  | 5.530864172 | 38.720706585 |
| 1.209207776  | 2.533461073 | 36.601778344 |
| 2.026727035  | 2.545447125 | 38.438005006 |
| -3.100469540 | 5.524663069 | 38.539085380 |
| 4.587333844  | 4.437037106 | 37.457817281 |
| 4.495621846  | 0.919882732 | 37.452780819 |
| 5.617046592  | 0.745506798 | 38.511232326 |
| -0.059222797 | 4.652730994 | 38.997052290 |
| 1.105225487  | 2.512983729 | 38.108687779 |
| 4.749200908  | 4.643032821 | 38.396741486 |
| 4.655798297  | 0.653760950 | 38.376588544 |

**Cu(111)\_Rf\_sur**

**1.0**

|               |              |               |
|---------------|--------------|---------------|
| 7.6687002182  | 0.0000000000 | 0.0000000000  |
| -3.8343501091 | 6.6412892030 | 0.0000000000  |
| 0.0000000000  | 0.0000000000 | 59.6202011108 |

**Cu H O**

**27 8 4**

**Cartesian**

|                     |                    |                     |
|---------------------|--------------------|---------------------|
| <b>-0.000171052</b> | <b>0.291794028</b> | <b>34.164430065</b> |
| <b>1.278146795</b>  | <b>1.032742208</b> | <b>32.080656770</b> |
| <b>-0.000038281</b> | <b>1.771032516</b> | <b>30.000287863</b> |
| <b>2.555814073</b>  | <b>0.291414184</b> | <b>34.162464902</b> |
| <b>3.834286574</b>  | <b>1.031370186</b> | <b>32.075042018</b> |
| <b>2.556246281</b>  | <b>1.771032516</b> | <b>30.000287863</b> |
| <b>5.112865433</b>  | <b>0.290804720</b> | <b>34.158307142</b> |
| <b>6.390706720</b>  | <b>1.031260238</b> | <b>32.075635476</b> |
| <b>5.112454166</b>  | <b>1.771032516</b> | <b>30.000287863</b> |
| <b>-1.276945119</b> | <b>2.504437223</b> | <b>34.164007182</b> |
| <b>0.001481315</b>  | <b>3.244918570</b> | <b>32.081896991</b> |
| <b>-1.278142338</b> | <b>3.984773680</b> | <b>30.000287863</b> |
| <b>1.278863855</b>  | <b>2.505106806</b> | <b>34.179835099</b> |
| <b>2.554441689</b>  | <b>3.244559137</b> | <b>32.079953149</b> |
| <b>1.278142224</b>  | <b>3.984773680</b> | <b>30.000287863</b> |
| <b>3.833257207</b>  | <b>2.504565479</b> | <b>34.161189145</b> |
| <b>5.112672769</b>  | <b>3.245017731</b> | <b>32.075393828</b> |
| <b>3.834350109</b>  | <b>3.984773680</b> | <b>30.000287863</b> |
| <b>-2.556409205</b> | <b>4.718878253</b> | <b>34.160794691</b> |
| <b>-1.277128855</b> | <b>5.458193817</b> | <b>32.077884930</b> |
| <b>-2.556246167</b> | <b>6.198514448</b> | <b>30.000287863</b> |
| <b>0.000815677</b>  | <b>4.716707402</b> | <b>34.171683046</b> |
| <b>1.277880311</b>  | <b>5.457730274</b> | <b>32.078151453</b> |



|              |             |              |
|--------------|-------------|--------------|
| 0.000038396  | 6.198514448 | 30.000287863 |
| 2.555486825  | 4.717280595 | 34.166995794 |
| 3.833714525  | 5.458654192 | 32.076683800 |
| 2.556246281  | 6.198514448 | 30.000287863 |
| 0.737971137  | 3.343382718 | 38.614196156 |
| -0.985399864 | 4.698941183 | 39.060778655 |
| 5.892208856  | 0.370487042 | 38.789952128 |
| 0.364231602  | 5.539472064 | 39.049563364 |
| 1.177368586  | 2.595478558 | 37.306847202 |
| 4.843907759  | 4.495512606 | 37.746055896 |
| -3.018002995 | 5.588123819 | 38.829386881 |
| 4.801927514  | 0.629937290 | 37.718383694 |
| -0.027678637 | 4.669256265 | 39.333730260 |
| 4.925855310  | 0.436840592 | 38.663634408 |
| 1.196063574  | 2.515895348 | 38.269436129 |
| -2.683061540 | 4.682908002 | 38.691978248 |

**Cu(111)\_Rf\_top**

**1.0**

|               |              |               |
|---------------|--------------|---------------|
| 7.6687002182  | 0.0000000000 | 0.0000000000  |
| -3.8343501091 | 6.6412892030 | 0.0000000000  |
| 0.0000000000  | 0.0000000000 | 59.6202011108 |

**Cu H O**

**27 9 4**

**Cartesian**

|              |             |              |
|--------------|-------------|--------------|
| -0.007947984 | 0.280165687 | 34.148616363 |
|--------------|-------------|--------------|

|              |             |              |
|--------------|-------------|--------------|
| 1.278135482  | 1.038338957 | 32.079661751 |
| -0.000038281 | 1.771032516 | 30.000287863 |
| 2.563309895  | 0.279585739 | 34.147461430 |
| 3.831545632  | 1.033695023 | 32.071847294 |
| 2.556246281  | 1.771032516 | 30.000287863 |
| 5.112604777  | 0.291044804 | 34.149625597 |
| 6.393203175  | 1.033461471 | 32.072501164 |
| 5.112454166  | 1.771032516 | 30.000287863 |
| -1.290274154 | 2.503842060 | 34.149433701 |
| 0.004813159  | 3.243190480 | 32.076093895 |
| -1.278142338 | 3.984773680 | 30.000287863 |
| 1.278229871  | 2.503167133 | 34.191032621 |
| 2.551259999  | 3.243023826 | 32.074189144 |
| 1.278142224  | 3.984773680 | 30.000287863 |
| 3.845332157  | 2.503969326 | 34.147102512 |
| 5.112634145  | 3.245755994 | 32.076701568 |
| 3.834350109  | 3.984773680 | 30.000287863 |
| -2.556465156 | 4.719273313 | 34.151608529 |
| -1.276468474 | 5.457775006 | 32.078588551 |
| -2.556246167 | 6.198514448 | 30.000287863 |
| -0.004904806 | 4.726317097 | 34.159778349 |
| 1.277857000  | 5.454476373 | 32.076669585 |
| 0.000038396  | 6.198514448 | 30.000287863 |
| 2.560023217  | 4.726614382 | 34.156178511 |
| 3.833079398  | 5.458018059 | 32.077927574 |
| 2.556246281  | 6.198514448 | 30.000287863 |

|              |             |              |
|--------------|-------------|--------------|
| 1.286481491  | 2.626422284 | 35.713206275 |
| 0.733642722  | 3.350308539 | 38.625073850 |
| -0.984849985 | 4.698503371 | 39.056844774 |
| 5.889141924  | 0.363381257 | 38.797912283 |
| 0.364976888  | 5.540792229 | 39.046080796 |
| 1.177702034  | 2.593849628 | 37.320763260 |
| 4.851381412  | 4.499647277 | 37.750199442 |
| -3.009619247 | 5.587309552 | 38.838064872 |
| 4.802025931  | 0.620393059 | 37.723174002 |
| -0.028840332 | 4.673136403 | 39.334003890 |
| 4.923938703  | 0.439493639 | 38.671484401 |
| 1.195113398  | 2.520499697 | 38.291628617 |
| -2.684740238 | 4.678306622 | 38.698623556 |

Cu(111)\_Rf\_fcc

1.0

|               |              |               |
|---------------|--------------|---------------|
| 7.6687002182  | 0.0000000000 | 0.0000000000  |
| -3.8343501091 | 6.6412892030 | 0.0000000000  |
| 0.0000000000  | 0.0000000000 | 59.6202011108 |

Cu H O

27 9 4

Cartesian

|              |             |              |
|--------------|-------------|--------------|
| -0.015474987 | 0.283047883 | 34.148051334 |
| 1.276115200  | 1.028853262 | 32.058865844 |
| -0.000038281 | 1.771032516 | 30.000287863 |
| 2.555601198  | 0.273183012 | 34.181057551 |

|              |             |              |
|--------------|-------------|--------------|
| 3.836242977  | 1.031374046 | 32.056875805 |
| 2.556246281  | 1.771032516 | 30.000287863 |
| 5.126655514  | 0.282703789 | 34.143332099 |
| 6.390643927  | 1.032834442 | 32.068229688 |
| 5.112454166  | 1.771032516 | 30.000287863 |
| -1.276942534 | 2.506063580 | 34.151903481 |
| 0.009673513  | 3.239750529 | 32.086289291 |
| -1.278142338 | 3.984773680 | 30.000287863 |
| 1.269405974  | 2.509971032 | 34.183957322 |
| 2.556576643  | 3.247715064 | 32.060177138 |
| 1.278142224  | 3.984773680 | 30.000287863 |
| 3.849805813  | 2.513261351 | 34.183278577 |
| 5.104690147  | 3.240230301 | 32.082181282 |
| 3.834350109  | 3.984773680 | 30.000287863 |
| -2.554100771 | 4.715787839 | 34.152379669 |
| -1.276975387 | 5.467193901 | 32.084452059 |
| -2.556246167 | 6.198514448 | 30.000287863 |
| -0.001683234 | 4.714991385 | 34.158232516 |
| 1.276374199  | 5.456605264 | 32.071587879 |
| 0.000038396  | 6.198514448 | 30.000287863 |
| 2.555663719  | 4.735504023 | 34.152244631 |
| 3.835617392  | 5.457412801 | 32.070457821 |
| 2.556246281  | 6.198514448 | 30.000287863 |
| 2.566674564  | 1.760234870 | 35.042669772 |
| 2.023334357  | 2.463761681 | 38.024938527 |
| 0.303711495  | 3.819797741 | 38.438532578 |

|              |             |              |
|--------------|-------------|--------------|
| 3.346136460  | 6.138178734 | 38.160300263 |
| 1.650040371  | 4.658664857 | 38.426855314 |
| 2.476377319  | 1.695254628 | 36.739423143 |
| -1.541641955 | 3.619361407 | 37.108468752 |
| -1.735326537 | 4.707129375 | 38.198956769 |
| 2.262421646  | 6.393679225 | 37.078788743 |
| 1.255230580  | 3.797244091 | 38.727642588 |
| 2.381492259  | 6.203465365 | 38.030411134 |
| 2.483207503  | 1.628241491 | 37.705228116 |
| -1.401077192 | 3.802330785 | 38.059394630 |

**Cu(111)\_Volmer**

1.0

|               |              |               |
|---------------|--------------|---------------|
| 7.6687002182  | 0.0000000000 | 0.0000000000  |
| -3.8343501091 | 6.6412892030 | 0.0000000000  |
| 0.0000000000  | 0.0000000000 | 59.6202011108 |

**Cu O H**

27 4 9

**Cartesian**

|              |             |              |
|--------------|-------------|--------------|
| -0.008359436 | 0.294928406 | 34.154813913 |
| 1.270085039  | 1.032770017 | 32.052497720 |
| -0.000038167 | 1.771032516 | 30.000287863 |
| 2.545159688  | 0.286177189 | 34.106239196 |
| 3.830745953  | 1.030961667 | 32.053350594 |
| 2.556246281  | 1.771032516 | 30.000287863 |
| 5.097683912  | 0.291029886 | 34.147823901 |

|              |             |              |
|--------------|-------------|--------------|
| 6.386449154  | 1.033260477 | 32.076164968 |
| 5.112454166  | 1.771032516 | 30.000287863 |
| -1.287886972 | 2.506498225 | 34.168005028 |
| -0.008701854 | 3.247638863 | 32.056015824 |
| -1.278142338 | 3.984773680 | 30.000287863 |
| 1.261184294  | 2.509146868 | 34.132664069 |
| 2.547450152  | 3.247324359 | 32.053016551 |
| 1.278141995  | 3.984773680 | 30.000287863 |
| 3.828950046  | 2.506564530 | 34.106548362 |
| 5.113618146  | 3.246006371 | 32.069789736 |
| 3.834350109  | 3.984773680 | 30.000287863 |
| -2.566698633 | 4.715561807 | 34.153417332 |
| -1.282715297 | 5.452404882 | 32.069061240 |
| -2.556246052 | 6.198514448 | 30.000287863 |
| -0.009029587 | 4.722842707 | 34.162660352 |
| 1.273845805  | 5.455726869 | 32.074114517 |
| 0.000038396  | 6.198514448 | 30.000287863 |
| 2.550943121  | 4.720419303 | 34.156420159 |
| 3.828646995  | 5.460778728 | 32.082039137 |
| 2.556246281  | 6.198514448 | 30.000287863 |
| -0.822283130 | 3.855473082 | 38.030436010 |
| 1.308788976  | 2.476317107 | 37.304505352 |
| -0.707667660 | 6.557211889 | 37.228226450 |
| 4.417495098  | 2.682370378 | 37.272941914 |
| -0.866988489 | 4.794887714 | 37.715249383 |
| -1.665540641 | 3.414547746 | 37.745206576 |

|              |             |              |
|--------------|-------------|--------------|
| 2.120805175  | 3.018648362 | 37.402152297 |
| 0.514348579  | 3.061966016 | 37.563196196 |
| 2.262956699  | 0.382531225 | 37.267263196 |
| -0.554571255 | 6.414141194 | 36.255498985 |
| 1.158305299  | 2.513925788 | 35.704435890 |
| 4.484867787  | 2.826649806 | 36.293153364 |
| 4.239385121  | 1.715806258 | 37.356168184 |

**Cu(111)\_Heyrovsky**

1.0

|               |              |               |
|---------------|--------------|---------------|
| 7.6687002182  | 0.0000000000 | 0.0000000000  |
| -3.8343501091 | 6.6412892030 | 0.0000000000  |
| 0.0000000000  | 0.0000000000 | 59.6202011108 |

**Cu H O**

27 10 4

**Cartesian**

|              |             |              |
|--------------|-------------|--------------|
| -0.009650273 | 0.280902688 | 34.139885068 |
| 1.278309176  | 1.039033281 | 32.091900490 |
| -0.000038167 | 1.771032516 | 30.000287863 |
| 2.565269226  | 0.281138245 | 34.139138803 |
| 3.833646647  | 1.032644829 | 32.068261671 |
| 2.556246281  | 1.771032516 | 30.000287863 |
| 5.113128617  | 0.293215630 | 34.157550217 |
| 6.391657525  | 1.032705790 | 32.068919094 |
| 5.112454166  | 1.771032516 | 30.000287863 |
| -1.296361923 | 2.505722751 | 34.135649128 |

|              |             |              |
|--------------|-------------|--------------|
| 0.004951772  | 3.244366555 | 32.089348976 |
| -1.278142338 | 3.984773680 | 30.000287863 |
| 1.274908083  | 2.506051506 | 34.202240805 |
| 2.551323420  | 3.244042155 | 32.087191916 |
| 1.278141995  | 3.984773680 | 30.000287863 |
| 3.851081323  | 2.505420716 | 34.132760018 |
| 5.112619861  | 3.247482106 | 32.059484178 |
| 3.834350109  | 3.984773680 | 30.000287863 |
| -2.556683630 | 4.721191214 | 34.139792673 |
| -1.279622168 | 5.459657280 | 32.061076209 |
| -2.556246052 | 6.198514448 | 30.000287863 |
| -0.009106150 | 4.739556357 | 34.138605757 |
| 1.278117541  | 5.458548896 | 32.070205512 |
| 0.000038396  | 6.198514448 | 30.000287863 |
| 2.563556981  | 4.738433722 | 34.135755737 |
| 3.835345651  | 5.460118448 | 32.060461429 |
| 2.556246281  | 6.198514448 | 30.000287863 |
| 1.333938876  | 2.630414052 | 35.902718391 |
| 0.695605965  | 3.456527421 | 38.571143796 |
| -0.987091441 | 4.754491049 | 38.916276955 |
| 0.359860221  | 5.612343213 | 38.894109343 |
| 1.232328192  | 2.612993412 | 36.751811136 |
| 2.057226449  | 2.614420061 | 38.562728774 |
| 4.828793616  | 4.508065063 | 37.639674102 |
| -3.053231105 | 5.601983378 | 38.719064099 |
| 4.638432652  | 0.813676006 | 37.636617971 |



|              |             |              |
|--------------|-------------|--------------|
| 5.764438303  | 0.628426621 | 38.689767883 |
| -0.018692245 | 4.727437754 | 39.157124967 |
| 1.129469538  | 2.578150348 | 38.249951516 |
| -2.670388209 | 4.716587855 | 38.576086911 |
| 4.802008676  | 0.544496218 | 38.558251187 |

**Au(111)\_Rf\_sur**

**1.0**

|               |              |               |
|---------------|--------------|---------------|
| 8.6400995255  | 0.0000000000 | 0.0000000000  |
| -4.3200497627 | 7.4825456803 | 0.0000000000  |
| 0.0000000000  | 0.0000000000 | 60.1489982605 |

**Au H O**

**27 8 4**

**Cartesian**

|              |             |              |
|--------------|-------------|--------------|
| -0.000024382 | 0.333808274 | 34.936732118 |
| 1.439925670  | 1.166005620 | 32.470418319 |
| -0.000043130 | 1.995370371 | 29.999915261 |
| 2.879558118  | 0.334252456 | 34.932842220 |
| 4.319303542  | 1.164665518 | 32.463477450 |
| 2.880047681  | 1.995370371 | 29.999915261 |
| 5.760588191  | 0.333520050 | 34.920745891 |
| 7.201852787  | 1.163859160 | 32.464061831 |
| 5.760052102  | 1.995370371 | 29.999915261 |
| -1.439227859 | 2.827681474 | 34.930171276 |
| 0.002408480  | 3.657294756 | 32.469729968 |
| -1.440045470 | 4.489527587 | 29.999915261 |

|              |             |              |
|--------------|-------------|--------------|
| 1.440093364  | 2.827459815 | 34.957716058 |
| 2.878372804  | 3.657241906 | 32.469726383 |
| 1.440045341  | 4.489527587 | 29.999915261 |
| 4.319463318  | 2.827598519 | 34.930615836 |
| 5.760751716  | 3.657484304 | 32.462828536 |
| 4.320049763  | 4.489527587 | 29.999915261 |
| -2.880887436 | 5.323388743 | 34.919125399 |
| -1.439150417 | 6.153299726 | 32.463183467 |
| -2.880047552 | 6.983684356 | 29.999915261 |
| -0.000239985 | 5.321007132 | 34.931953100 |
| 1.440173316  | 6.151153155 | 32.464137119 |
| 0.000043259  | 6.983684356 | 29.999915261 |
| 2.879519816  | 5.321451343 | 34.933677562 |
| 4.319135398  | 6.153033022 | 32.463068742 |
| 2.880047681  | 6.983684356 | 29.999915261 |
| 1.033418843  | 3.550928864 | 39.399574733 |
| -0.695211737 | 4.919286081 | 39.849548124 |
| 2.359070601  | 7.234403273 | 39.564585292 |
| 0.656447534  | 5.755242073 | 39.837254611 |
| 1.472940203  | 2.800590878 | 38.094365087 |
| -2.538559379 | 4.711145810 | 38.532016284 |
| -2.744078524 | 5.812450677 | 39.603674288 |
| 5.580264354  | 0.012138329 | 38.503263303 |
| 0.262299116  | 4.886354295 | 40.120908860 |
| 1.393659929  | 7.300298065 | 39.448999744 |
| 1.494065224  | 2.724555732 | 39.057041407 |

**-2.403195464      4.908426115      39.476791902**

**Au(111)\_Rf\_top**

**1.0**

**8.6400995255      0.0000000000      0.0000000000**  
**-4.3200497627      7.4825456803      0.0000000000**  
**0.0000000000      0.0000000000      60.1489982605**

**Au   H   O**

**27   9   4**

**Cartesian**

**-0.012834631      0.313300890      34.931673458**  
**1.439932816      1.173683080      32.490817878**  
**-0.000043130      1.995370371      29.999915261**  
**2.892913903      0.313404835      34.930146180**  
**4.320140530      1.163779550      32.462824951**  
**2.880047681      1.995370371      29.999915261**  
**5.760625029      0.333162780      34.927034261**  
**7.200325906      1.163206113      32.462961187**  
**5.760052102      1.995370371      29.999915261**  
**-1.463595113      2.826465024      34.927579205**  
**0.007945653      3.653901407      32.488749240**  
**-1.440045470      4.489527587      29.999915261**  
**1.439464819      2.826994197      34.934806887**  
**2.874366053      3.654827515      32.486770232**  
**1.440045341      4.489527587      29.999915261**  
**4.343742138      2.825734931      34.927213519**

|              |             |              |
|--------------|-------------|--------------|
| 5.760844157  | 3.659263376 | 32.455934274 |
| 4.320049763  | 4.489527587 | 29.999915261 |
| -2.881108174 | 5.322552949 | 34.922043719 |
| -1.440627151 | 6.152661508 | 32.456421856 |
| -2.880047552 | 6.983684356 | 29.999915261 |
| -0.011661692 | 5.342872012 | 34.929597650 |
| 1.440131602  | 6.151864962 | 32.463491791 |
| 0.000043259  | 6.983684356 | 29.999915261 |
| 2.890035655  | 5.342771217 | 34.929411222 |
| 4.320974427  | 6.152389897 | 32.456221087 |
| 2.880047681  | 6.983684356 | 29.999915261 |
| 1.468837019  | 2.862434256 | 36.539847022 |
| 1.026676079  | 3.564669062 | 39.410513055 |
| -0.695013981 | 4.917512361 | 39.840760897 |
| 2.350414390  | 7.225612276 | 39.574118232 |
| 0.655316615  | 5.759037040 | 39.829546518 |
| 1.471599555  | 2.802908488 | 38.113326996 |
| -2.529494170 | 4.715917505 | 38.529775559 |
| -2.725684817 | 5.807432793 | 39.614246924 |
| 5.579537319  | 0.000906176 | 38.503066120 |
| 0.261462515  | 4.891053292 | 40.116979525 |
| 1.383735555  | 7.299632641 | 39.450813835 |
| 1.490178465  | 2.733111021 | 39.082639447 |
| -2.396328297 | 4.899073611 | 39.478028782 |

Au(111)\_Rf\_fcc

1.0

|               |              |               |
|---------------|--------------|---------------|
| 8.6400995255  | 0.0000000000 | 0.0000000000  |
| -4.3200497627 | 7.4825456803 | 0.0000000000  |
| 0.0000000000  | 0.0000000000 | 60.1489982605 |

Au H O

27 9 4

Cartesian

|              |             |              |
|--------------|-------------|--------------|
| -0.005624898 | 0.333222544 | 34.890809808 |
| 1.442025092  | 1.166762138 | 32.440328074 |
| -0.000043130 | 1.995370371 | 29.999915261 |
| 2.878765420  | 0.259247558 | 34.952614375 |
| 4.317173028  | 1.166479824 | 32.439682745 |
| 2.880047681  | 1.995370371 | 29.999915261 |
| 5.762556209  | 0.331140697 | 34.902952744 |
| 7.199088063  | 1.168545224 | 32.451259226 |
| 5.760052102  | 1.995370371 | 29.999915261 |
| -1.440027542 | 2.829424866 | 34.962337329 |
| 0.000295733  | 3.656760455 | 32.463086668 |
| -1.440045470 | 4.489527587 | 29.999915261 |
| 1.367564867  | 2.866808347 | 34.952628716 |
| 2.879235928  | 3.653414381 | 32.444813109 |
| 1.440045341  | 4.489527587 | 29.999915261 |
| 4.387338107  | 2.864120784 | 34.953231023 |
| 5.759352231  | 3.655385900 | 32.459971164 |
| 4.320049763  | 4.489527587 | 29.999915261 |
| -2.881266775 | 5.321944167 | 34.927966403 |

|              |             |              |
|--------------|-------------|--------------|
| -1.440977473 | 6.156205826 | 32.456991896 |
| -2.880047552 | 6.983684356 | 29.999915261 |
| -0.000867758 | 5.321752389 | 34.930515451 |
| 1.437862813  | 6.152719933 | 32.449653074 |
| 0.000043259  | 6.983684356 | 29.999915261 |
| 2.878107456  | 5.325319453 | 34.893132991 |
| 4.321415259  | 6.150747746 | 32.449459476 |
| 2.880047681  | 6.983684356 | 29.999915261 |
| 2.878596439  | 2.003745702 | 35.605411005 |
| 2.453553510  | 2.673757853 | 38.638811020 |
| 0.709598113  | 4.077086612 | 38.913025543 |
| 3.774746355  | 6.398167196 | 38.595652868 |
| 2.059029150  | 4.898984412 | 38.897372736 |
| 2.955894130  | 1.824180743 | 37.427790689 |
| -1.109256023 | 3.883928634 | 37.524640193 |
| -1.366146971 | 4.940489996 | 38.629650937 |
| 2.705723544  | 6.613851463 | 37.496009108 |
| 1.636533620  | 4.081582682 | 39.266887973 |
| 2.814182254  | 6.491049114 | 38.464213744 |
| 2.938267565  | 1.831102578 | 38.390262656 |
| -1.046221625 | 4.030015463 | 38.494339841 |

Au(111)\_Volmer

1.0

|               |              |              |
|---------------|--------------|--------------|
| 8.6400995255  | 0.0000000000 | 0.0000000000 |
| -4.3200497627 | 7.4825456803 | 0.0000000000 |

0.0000000000 0.0000000000 60.1489982605

Au O H

27 4 9

Cartesian

|              |             |              |
|--------------|-------------|--------------|
| -0.012753359 | 0.317934048 | 34.903146342 |
| 1.437099276  | 1.171954071 | 32.462455679 |
| -0.000043130 | 1.995370371 | 29.999917054 |
| 2.883863741  | 0.318821856 | 34.877039210 |
| 4.320026588  | 1.162882432 | 32.440736782 |
| 2.880047681  | 1.995370371 | 29.999917054 |
| 5.756523213  | 0.327801787 | 34.905867478 |
| 7.200027920  | 1.160382633 | 32.449495327 |
| 5.760052102  | 1.995370371 | 29.999917054 |
| -1.458449235 | 2.822444830 | 34.901084875 |
| 0.011195369  | 3.647631394 | 32.473268521 |
| -1.440045341 | 4.489527587 | 29.999917054 |
| 1.433484754  | 2.816951739 | 34.998845009 |
| 2.865568993  | 3.649913547 | 32.475150730 |
| 1.440045599  | 4.489527587 | 29.999917054 |
| 4.328832661  | 2.826791938 | 34.895298428 |
| 5.759979360  | 3.654733187 | 32.442529362 |
| 4.320049763  | 4.489527587 | 29.999917054 |
| -2.886166760 | 5.318017631 | 34.895004445 |
| -1.441354961 | 6.146490729 | 32.439413858 |
| -2.880047423 | 6.983684356 | 29.999917054 |
| -0.006811774 | 5.328824078 | 34.892928637 |

|              |             |              |
|--------------|-------------|--------------|
| 1.441725239  | 6.149298264 | 32.447107611 |
| 0.000043517  | 6.983684356 | 29.999917054 |
| 2.880742145  | 5.330834621 | 34.914805282 |
| 4.317414044  | 6.148207807 | 32.450800325 |
| 2.880047681  | 6.983684356 | 29.999917054 |
| -0.770401960 | 4.134148037 | 38.998857851 |
| 1.513718146  | 2.806210854 | 38.488553393 |
| -0.743280781 | 6.737507892 | 38.101503140 |
| 5.541183772  | 2.940357073 | 38.130887109 |
| -0.770079318 | 5.052735656 | 38.614564585 |
| -1.576814922 | 3.689874430 | 38.620490854 |
| 2.227397813  | 3.470820228 | 38.489033805 |
| 0.665417115  | 3.327562119 | 38.649688395 |
| -1.648872782 | 7.093447164 | 38.186030450 |
| -0.571266117 | 6.749242007 | 37.129164814 |
| 1.430446828  | 2.740897639 | 36.602336355 |
| 5.459777361  | 3.013871903 | 37.149030184 |
| 5.566332668  | 1.979268633 | 38.300006261 |

Au(111)\_Heyrovsky

1.0

|               |              |               |
|---------------|--------------|---------------|
| 8.6513996124  | 0.0000000000 | 0.0000000000  |
| -4.3256998062 | 7.4923318427 | 0.0000000000  |
| 0.0000000000  | 0.0000000000 | 64.7091979980 |

Au H O

27 10 4



## Cartesian

|              |             |              |
|--------------|-------------|--------------|
| -0.011565174 | 0.320115297 | 34.790270914 |
| 1.442025736  | 1.181652504 | 32.386503845 |
| 0.000129947  | 1.998129874 | 29.873648199 |
| 2.895792793  | 0.320955812 | 34.789333671 |
| 4.325787791  | 1.166527585 | 32.328844090 |
| 2.883468127  | 1.997680394 | 29.873002157 |
| 5.768637912  | 0.332615651 | 34.814504249 |
| 7.209588586  | 1.166388141 | 32.327902990 |
| 5.767801796  | 1.997755419 | 29.873002157 |
| -1.462736575 | 2.826565816 | 34.783235803 |
| 0.011743336  | 3.657428461 | 32.383684400 |
| -1.441669219 | 4.495399284 | 29.873648199 |
| 1.440790141  | 2.832252537 | 34.912552252 |
| 2.871911719  | 3.657268139 | 32.385150049 |
| 1.441625774  | 4.495324259 | 29.873648199 |
| 4.344328412  | 2.828149827 | 34.787802454 |
| 5.766844982  | 3.666176696 | 32.315319629 |
| 4.325742864  | 4.495623913 | 29.874296170 |
| -2.884141004 | 5.329401594 | 34.784007197 |
| -1.443927181 | 6.161479601 | 32.315115210 |
| -2.884203464 | 6.992743049 | 29.874296170 |
| -0.008847498 | 5.348964827 | 34.783621500 |
| 1.442212084  | 6.161433603 | 32.328313757 |
| -0.000000258 | 6.993043150 | 29.873648199 |
| 2.890806278  | 5.348265040 | 34.786903781 |

|              |             |              |
|--------------|-------------|--------------|
| 4.327608277  | 6.161777468 | 32.317107334 |
| 2.884290869  | 6.992743049 | 29.874296170 |
| 1.441302195  | 2.876790632 | 36.724679598 |
| 0.797882422  | 3.839143415 | 39.326802857 |
| -0.865413340 | 5.045500043 | 39.676248084 |
| 5.219158494  | 0.259149392 | 38.394689217 |
| 6.353422637  | 0.100690792 | 39.445061377 |
| 0.490938047  | 5.900502673 | 39.637470120 |
| 1.351158526  | 2.930508133 | 37.667534897 |
| 2.175156602  | 2.948180779 | 39.318294384 |
| -2.694015214 | 4.817714563 | 38.397072824 |
| -2.954458826 | 5.906360434 | 39.471061203 |
| 0.109232763  | 5.014925542 | 39.903662676 |
| 1.069705981  | 7.468391701 | 39.310472452 |
| 1.250999895  | 2.945680613 | 38.985221990 |
| -2.545375511 | 5.031165343 | 39.336599558 |

Ag(111)\_Rf\_sur

1.0

|               |              |               |
|---------------|--------------|---------------|
| 8.6679000854  | 0.0000000000 | 0.0000000000  |
| -4.3339500427 | 7.5066216715 | 0.0000000000  |
| 0.0000000000  | 0.0000000000 | 60.1641006470 |

Ag H O

27 8 4

Cartesian

|             |             |              |
|-------------|-------------|--------------|
| 0.001720677 | 0.335975552 | 34.818521756 |
|-------------|-------------|--------------|

|              |             |              |
|--------------|-------------|--------------|
| 1.444561711  | 1.164743600 | 32.401782787 |
| -0.000043269 | 2.001790716 | 30.000227196 |
| 2.887273954  | 0.335784891 | 34.816800447 |
| 4.333763791  | 1.167432651 | 32.404429299 |
| 2.889314581  | 2.001790716 | 30.000227196 |
| 5.779232298  | 0.333307782 | 34.807516138 |
| 7.223691697  | 1.167457148 | 32.404303787 |
| 5.778585763  | 2.001790716 | 30.000227196 |
| -1.440903978 | 2.835495086 | 34.815452089 |
| -0.001853601 | 3.671090740 | 32.401678791 |
| -1.444678990 | 4.503973182 | 30.000227196 |
| 1.444319145  | 2.834919020 | 34.809276894 |
| 2.891063173  | 3.671038391 | 32.401678791 |
| 1.444678860  | 4.503973182 | 30.000227196 |
| 4.329953648  | 2.835651015 | 34.814921352 |
| 5.778630453  | 3.669205272 | 32.404547639 |
| 4.333950043  | 4.503973182 | 30.000227196 |
| -2.889700694 | 5.338597019 | 34.811299431 |
| -1.443827426 | 6.172074542 | 32.404863213 |
| -2.889314452 | 7.006155200 | 30.000227196 |
| 0.001278960  | 5.334135252 | 34.819360894 |
| 1.444617379  | 6.171237402 | 32.405666490 |
| 0.000043398  | 7.006155200 | 30.000227196 |
| 2.887261425  | 5.334185364 | 34.819238968 |
| 4.333089825  | 6.172178346 | 32.405067618 |
| 2.889314581  | 7.006155200 | 30.000227196 |

|              |             |              |
|--------------|-------------|--------------|
| 0.969560107  | 3.447856968 | 39.260039766 |
| -0.760845785 | 4.826298722 | 39.691995019 |
| 2.296084358  | 7.141046252 | 39.397758808 |
| 0.590808698  | 5.661288110 | 39.679716350 |
| 1.424993702  | 2.690910250 | 37.964561302 |
| -2.610589994 | 4.609297196 | 38.367236376 |
| -2.814166193 | 5.715098668 | 39.435939587 |
| 1.196107538  | 7.407691873 | 38.338020746 |
| 0.196601015  | 4.792646653 | 39.963258930 |
| 1.328491643  | 7.201843869 | 39.279942398 |
| 1.428980151  | 2.616794445 | 38.927278514 |
| -2.463925049 | 4.813963538 | 39.309054032 |

Ag(111)\_Rf\_top

1.0

|               |              |               |
|---------------|--------------|---------------|
| 8.6679000854  | 0.0000000000 | 0.0000000000  |
| -4.3339500427 | 7.5066216715 | 0.0000000000  |
| 0.0000000000  | 0.0000000000 | 60.1641006470 |

Ag H O

27 9 4

Cartesian

|              |             |              |
|--------------|-------------|--------------|
| -0.008403136 | 0.319517696 | 34.808900357 |
| 1.444570623  | 1.169041832 | 32.401087092 |
| -0.000043269 | 2.001790716 | 30.000227196 |
| 2.897284686  | 0.319800164 | 34.807817367 |
| 4.331622935  | 1.168800667 | 32.403156248 |

|              |             |              |
|--------------|-------------|--------------|
| 2.889314581  | 2.001790716 | 30.000227196 |
| 5.779252658  | 0.333636726 | 34.798626296 |
| 7.225864327  | 1.168814426 | 32.402941085 |
| 5.778585763  | 2.001790716 | 30.000227196 |
| -1.459824177 | 2.834823046 | 34.806117575 |
| 0.001404376  | 3.669140171 | 32.400373466 |
| -1.444678990 | 4.503973182 | 30.000227196 |
| 1.444375718  | 2.833484561 | 34.767631981 |
| 2.888061453  | 3.669252252 | 32.399476951 |
| 1.444678860  | 4.503973182 | 30.000227196 |
| 4.348182250  | 2.834793292 | 34.806350669 |
| 5.778570780  | 3.670693870 | 32.404877557 |
| 4.333950043  | 4.503973182 | 30.000227196 |
| -2.889736714 | 5.339010892 | 34.802900879 |
| -1.444822101 | 6.171389975 | 32.404436471 |
| -2.889314452 | 7.006155200 | 30.000227196 |
| -0.007085298 | 5.349972467 | 34.810083757 |
| 1.444692552  | 6.168826204 | 32.404328890 |
| 0.000043398  | 7.006155200 | 30.000227196 |
| 2.895505046  | 5.349880297 | 34.810478224 |
| 4.334168843  | 6.171324203 | 32.404605016 |
| 2.889314581  | 7.006155200 | 30.000227196 |
| 1.456068862  | 2.874923470 | 36.431535061 |
| 0.970552845  | 3.450678011 | 39.268273359 |
| -0.762387460 | 4.827538997 | 39.687792156 |
| 2.290789242  | 7.136160321 | 39.404202958 |

|              |             |              |
|--------------|-------------|--------------|
| 0.586824832  | 5.667097982 | 39.676069327 |
| 1.425111497  | 2.691028819 | 37.970065904 |
| -2.604462285 | 4.613741513 | 38.366314759 |
| -2.803295389 | 5.712850335 | 39.443667546 |
| 1.196409519  | 7.399838143 | 38.337117059 |
| 0.192279778  | 4.801727235 | 39.968161074 |
| 1.325789578  | 7.202477430 | 39.283919338 |
| 1.427127842  | 2.615134706 | 38.945079715 |
| -2.461959401 | 4.808266865 | 39.310821959 |

Ag(111)\_Rf\_fcc

1.0

|               |              |               |
|---------------|--------------|---------------|
| 8.6679000854  | 0.0000000000 | 0.0000000000  |
| -4.3339500427 | 7.5066216715 | 0.0000000000  |
| 0.0000000000  | 0.0000000000 | 60.1641006470 |

Ag H O

27 9 4

Cartesian

|              |             |              |
|--------------|-------------|--------------|
| -0.017274387 | 0.326647206 | 34.806917266 |
| 1.440222715  | 1.169120467 | 32.383891935 |
| -0.000043269 | 2.001790716 | 30.000227196 |
| 2.888866583  | 0.299995340 | 34.815495121 |
| 4.338344191  | 1.168335005 | 32.381636303 |
| 2.889314581  | 2.001790716 | 30.000227196 |
| 5.793414165  | 0.325403660 | 34.810008450 |
| 7.222607319  | 1.169888368 | 32.403887804 |

|              |             |              |
|--------------|-------------|--------------|
| 5.778585763  | 2.001790716 | 30.000227196 |
| -1.445292556 | 2.844461126 | 34.811851685 |
| 0.007016843  | 3.668290950 | 32.409969762 |
| -1.444678990 | 4.503973182 | 30.000227196 |
| 1.410431099  | 2.855930534 | 34.838575003 |
| 2.888421427  | 3.674659214 | 32.387148077 |
| 1.444678860  | 4.503973182 | 30.000227196 |
| 4.366041190  | 2.856332549 | 34.827730758 |
| 5.772095384  | 3.668177079 | 32.406900095 |
| 4.333950043  | 4.503973182 | 30.000227196 |
| -2.883236518 | 5.336162555 | 34.814516127 |
| -1.444048293 | 6.180437448 | 32.406193641 |
| -2.889314452 | 7.006155200 | 30.000227196 |
| -0.005975024 | 5.336251146 | 34.819916733 |
| 1.443341519  | 6.173381931 | 32.406473353 |
| 0.000043398  | 7.006155200 | 30.000227196 |
| 2.889413260  | 5.357512550 | 34.806275361 |
| 4.335196196  | 6.173433833 | 32.405117823 |
| 2.889314581  | 7.006155200 | 30.000227196 |
| 2.894475110  | 2.000012183 | 35.649393892 |
| 2.410281322  | 2.609154139 | 38.621513121 |
| 0.661250172  | 4.032989184 | 38.883270388 |
| 3.740612874  | 6.358368981 | 38.537746350 |
| 2.013383328  | 4.856243838 | 38.864009660 |
| 2.918415246  | 1.779080436 | 37.401069374 |
| -1.155062380 | 3.844534556 | 37.465901750 |

|                     |                    |                     |
|---------------------|--------------------|---------------------|
| <b>-1.425700346</b> | <b>4.893738431</b> | <b>38.576737578</b> |
| <b>2.667198174</b>  | <b>6.586108369</b> | <b>37.440576995</b> |
| <b>1.600665471</b>  | <b>4.020550643</b> | <b>39.205764750</b> |
| <b>2.775253883</b>  | <b>6.412516454</b> | <b>38.399288579</b> |
| <b>2.887200719</b>  | <b>1.763515258</b> | <b>38.369556557</b> |
| <b>-1.066962424</b> | <b>3.996465960</b> | <b>38.430182484</b> |

**Ag(111)\_Volmer**

**1.0**

|                      |                     |                      |
|----------------------|---------------------|----------------------|
| <b>8.6679000854</b>  | <b>0.0000000000</b> | <b>0.0000000000</b>  |
| <b>-4.3339500427</b> | <b>7.5066216715</b> | <b>0.0000000000</b>  |
| <b>0.0000000000</b>  | <b>0.0000000000</b> | <b>60.1641006470</b> |

**Ag O H**

**27 4 9**

**Cartesian**

|                     |                    |                     |
|---------------------|--------------------|---------------------|
| <b>-0.002519736</b> | <b>0.331844687</b> | <b>34.806196468</b> |
| <b>1.440968624</b>  | <b>1.168455363</b> | <b>32.377071249</b> |
| <b>-0.000043269</b> | <b>2.001790716</b> | <b>30.000227196</b> |
| <b>2.887282398</b>  | <b>0.328193942</b> | <b>34.769801547</b> |
| <b>4.333350797</b>  | <b>1.166338574</b> | <b>32.384831482</b> |
| <b>2.889314839</b>  | <b>2.001790716</b> | <b>30.000227196</b> |
| <b>5.770983382</b>  | <b>0.330567947</b> | <b>34.802033053</b> |
| <b>7.223097682</b>  | <b>1.165162506</b> | <b>32.400606560</b> |
| <b>5.778585246</b>  | <b>2.001790716</b> | <b>30.000227196</b> |
| <b>-1.454563353</b> | <b>2.831202894</b> | <b>34.801226189</b> |
| <b>-0.000662987</b> | <b>3.666504140</b> | <b>32.379208540</b> |



|              |             |              |
|--------------|-------------|--------------|
| -1.444679119 | 4.503973629 | 30.000227196 |
| 1.436965707  | 2.832180304 | 34.771440376 |
| 2.882721260  | 3.669018023 | 32.382339171 |
| 1.444678860  | 4.503973629 | 30.000227196 |
| 4.337232560  | 2.838959532 | 34.772024904 |
| 5.780318210  | 3.669968811 | 32.396019989 |
| 4.333949784  | 4.503973629 | 30.000227196 |
| -2.891344746 | 5.333074844 | 34.804758458 |
| -1.448596983 | 6.167918817 | 32.394036898 |
| -2.889314452 | 7.006155648 | 30.000227196 |
| -0.001913144 | 5.343643577 | 34.782675502 |
| 1.446117464  | 6.169896456 | 32.395148576 |
| 0.000043398  | 7.006155648 | 30.000227196 |
| 2.890896037  | 5.345210922 | 34.803887046 |
| 4.333419446  | 6.171626218 | 32.409460541 |
| 2.889314322  | 7.006155648 | 30.000227196 |
| -0.742271288 | 4.136627283 | 38.840822198 |
| 1.472249217  | 2.801233170 | 38.239271416 |
| -0.699986306 | 6.741452318 | 37.983911681 |
| 5.589881699  | 2.939197167 | 38.019926480 |
| -0.753199924 | 5.065039507 | 38.481889881 |
| -1.569367442 | 3.700651290 | 38.500537393 |
| 2.201802719  | 3.448169273 | 38.268153542 |
| 0.632060515  | 3.337055298 | 38.425323373 |
| -1.605986161 | 7.098171318 | 38.064095979 |
| -0.512483447 | 6.763015289 | 37.015697038 |

|             |             |              |
|-------------|-------------|--------------|
| 1.371187360 | 2.746072270 | 36.438617529 |
| 5.539330880 | 3.007078489 | 37.037209811 |
| 5.620774355 | 1.979659062 | 38.199225886 |

Ag(111)\_Heyrovsky

1.0

|               |              |               |
|---------------|--------------|---------------|
| 8.6679000854  | 0.0000000000 | 0.0000000000  |
| -4.3339500427 | 7.5066216715 | 0.0000000000  |
| 0.0000000000  | 0.0000000000 | 60.1641006470 |

Ag H O

27 10 4

Cartesian

|              |             |              |
|--------------|-------------|--------------|
| -0.010318654 | 0.319824353 | 34.814860389 |
| 1.444052167  | 1.176370503 | 32.437851377 |
| -0.000043269 | 2.001790716 | 30.000227196 |
| 2.897987633  | 0.321084203 | 34.812457729 |
| 4.332756523  | 1.168527623 | 32.403507682 |
| 2.889314839  | 2.001790716 | 30.000227196 |
| 5.779474993  | 0.333570199 | 34.816997680 |
| 7.224467636  | 1.168594626 | 32.403586575 |
| 5.778585246  | 2.001790716 | 30.000227196 |
| -1.464862051 | 2.834351008 | 34.809345029 |
| 0.005816930  | 3.666320247 | 32.433938986 |
| -1.444679119 | 4.503973629 | 30.000227196 |
| 1.442223495  | 2.835973388 | 34.892555961 |
| 2.882268935  | 3.666141498 | 32.435477406 |

|              |             |              |
|--------------|-------------|--------------|
| 1.444678860  | 4.503973629 | 30.000227196 |
| 4.350491533  | 2.834475841 | 34.810302507 |
| 5.777995494  | 3.672123407 | 32.395711588 |
| 4.333949784  | 4.503973629 | 30.000227196 |
| -2.889794401 | 5.339375994 | 34.806217985 |
| -1.446851361 | 6.172134945 | 32.394675217 |
| -2.889314452 | 7.006155648 | 30.000227196 |
| -0.009688167 | 5.357276307 | 34.807329663 |
| 1.444627712  | 6.170555519 | 32.404561984 |
| 0.000043398  | 7.006155648 | 30.000227196 |
| 2.897386158  | 5.355844532 | 34.810230785 |
| 4.335233136  | 6.171924654 | 32.394954929 |
| 2.889314322  | 7.006155648 | 30.000227196 |
| 1.433451085  | 2.933569846 | 36.724300987 |
| 0.738913082  | 3.885762949 | 39.298328127 |
| -0.908838961 | 5.083636467 | 39.632997162 |
| 0.452817939  | 5.935450547 | 39.607848124 |
| 1.326015741  | 2.977737627 | 37.674499265 |
| 2.111915939  | 2.981562031 | 39.327389556 |
| -2.762328704 | 4.847312697 | 38.393357236 |
| -2.976269066 | 5.951653759 | 39.464183395 |
| 5.182784608  | 0.298675479 | 38.395828031 |
| 6.323701444  | 0.111991112 | 39.434695225 |
| 0.065522478  | 5.048432713 | 39.864308780 |
| 1.200774024  | 2.988499650 | 38.958774878 |
| -2.574141764 | 5.073342456 | 39.321884954 |

1.031135401      7.501699499      39.304636006

*Metal(100)*

Pt(100)\_Rf\_sur

1.0

|              |              |               |
|--------------|--------------|---------------|
| 8.3664999008 | 0.0000000000 | 0.0000000000  |
| 0.0000000000 | 8.3664999008 | 0.0000000000  |
| 0.0000000000 | 0.0000000000 | 43.9440002441 |

Pt H O

27 8 4

Cartesian

|             |             |              |
|-------------|-------------|--------------|
| 0.000000000 | 0.000000000 | 14.999845281 |
| 8.365285610 | 0.000107664 | 18.896441653 |
| 1.396442713 | 1.399791240 | 16.959340831 |
| 2.788805457 | 0.000000000 | 14.999845281 |
| 2.787860454 | 0.001280605 | 18.908469325 |
| 4.180010012 | 1.399274106 | 16.959175818 |
| 5.577694693 | 0.000000000 | 14.999845281 |
| 5.577607922 | 8.365857099 | 18.898256805 |
| 6.971495637 | 1.398266020 | 16.952232142 |
| 0.000000000 | 2.788805457 | 14.999845281 |
| 8.362879468 | 2.789496880 | 18.917628900 |
| 1.396440220 | 4.180298499 | 16.959518941 |
| 2.788805457 | 2.788805457 | 14.999845281 |
| 2.787156066 | 2.790492998 | 18.930358536 |
| 4.180001036 | 4.180768757 | 16.959627641 |

|             |             |              |
|-------------|-------------|--------------|
| 5.577694693 | 2.788805457 | 14.999845281 |
| 5.578940900 | 2.789773399 | 18.913160432 |
| 6.971479180 | 4.180645582 | 16.952517642 |
| 0.000000000 | 5.577694693 | 14.999845281 |
| 8.365222277 | 5.579852990 | 18.896617144 |
| 1.396848765 | 6.972927852 | 16.950210068 |
| 2.788805457 | 5.577694693 | 14.999845281 |
| 2.787749248 | 5.580732167 | 18.908562309 |
| 4.180431149 | 6.972906908 | 16.950682846 |
| 5.577694693 | 5.577694693 | 14.999845281 |
| 5.577454328 | 5.580961062 | 18.898914241 |
| 6.971345533 | 6.972413212 | 16.946696322 |
| 5.761008295 | 3.695122056 | 23.662899058 |
| 5.011713273 | 5.086978389 | 23.704925190 |
| 3.550117225 | 3.379276165 | 23.460882889 |
| 7.117421035 | 2.676870989 | 22.095247089 |
| 2.697068618 | 2.927641340 | 22.226178984 |
| 5.203599223 | 6.811394696 | 22.201086411 |
| 4.249602118 | 7.224661158 | 23.350376034 |
| 7.941319920 | 3.444371653 | 23.161749556 |
| 4.969433994 | 4.155639659 | 24.051325807 |
| 2.705477398 | 2.908326129 | 23.192722382 |
| 7.184462880 | 2.837044488 | 23.057164862 |
| 5.096311227 | 6.773371172 | 23.170513621 |

Pt(100)\_Rf\_top

1.0

|              |              |               |
|--------------|--------------|---------------|
| 8.3664999008 | 0.0000000000 | 0.0000000000  |
| 0.0000000000 | 8.3664999008 | 0.0000000000  |
| 0.0000000000 | 0.0000000000 | 43.9440002441 |

Pt H O

27 9 4

Cartesian

|             |             |              |
|-------------|-------------|--------------|
| 0.000000000 | 0.000000000 | 14.999845281 |
| 8.362714903 | 8.365043749 | 18.890945123 |
| 1.406526941 | 1.409176814 | 16.963581424 |
| 2.788805457 | 0.000000000 | 14.999845281 |
| 2.787908328 | 0.001079222 | 18.887322677 |
| 4.171177352 | 1.408249389 | 16.962668609 |
| 5.577694693 | 0.000000000 | 14.999845281 |
| 5.579782177 | 8.364061345 | 18.894671029 |
| 6.971710070 | 1.394306608 | 16.944399225 |
| 0.000000000 | 2.788805457 | 14.999845281 |
| 8.363328780 | 2.789419335 | 18.896779539 |
| 1.407792970 | 4.169041496 | 16.965632310 |
| 2.788805457 | 2.788805457 | 14.999845281 |
| 2.784578626 | 2.795145205 | 19.077816693 |
| 4.169822681 | 4.170201431 | 16.964322676 |
| 5.577694693 | 2.788805457 | 14.999845281 |
| 5.578811243 | 2.789828005 | 18.891927347 |
| 6.971744978 | 4.184651746 | 16.944752826 |
| 0.000000000 | 5.577694693 | 14.999845281 |

|             |             |              |
|-------------|-------------|--------------|
| 8.362866502 | 5.581836249 | 18.891108827 |
| 1.392665943 | 6.972230196 | 16.942341792 |
| 2.788805457 | 5.577694693 | 14.999845281 |
| 2.788093838 | 5.580749122 | 18.888899475 |
| 4.184672691 | 6.972375811 | 16.942662652 |
| 5.577694693 | 5.577694693 | 14.999845281 |
| 5.579375252 | 5.583245525 | 18.895272151 |
| 6.971239813 | 6.972268594 | 16.938394557 |
| 2.828876322 | 2.693831920 | 20.635713204 |
| 5.759501776 | 3.691887603 | 23.664756118 |
| 5.011077952 | 5.088226590 | 23.705365226 |
| 3.554169018 | 3.380770716 | 23.466922918 |
| 7.118563018 | 2.673388192 | 22.107693844 |
| 2.696099179 | 2.928617510 | 22.238822184 |
| 5.203893446 | 6.812692268 | 22.209051600 |
| 4.248878031 | 7.221953812 | 23.357042068 |
| 7.936550523 | 3.449209370 | 23.172354966 |
| 4.970037899 | 4.157002309 | 24.052750688 |
| 2.706258833 | 2.909170648 | 23.207678394 |
| 7.182638202 | 2.836736302 | 23.068642488 |
| 5.098297977 | 6.774200979 | 23.178009962 |

**Pt(100)\_Rf\_min**

**1.0**

|              |              |              |
|--------------|--------------|--------------|
| 8.3664999008 | 0.0000000000 | 0.0000000000 |
| 0.0000000000 | 8.3664999008 | 0.0000000000 |

0.0000000000 0.0000000000 43.9440002441

Pt H O

27 9 4

Cartesian

|             |             |              |
|-------------|-------------|--------------|
| 0.000000000 | 0.000000000 | 14.999845281 |
| 8.360265874 | 8.365057213 | 18.890654384 |
| 1.396893272 | 1.394816261 | 16.955240370 |
| 2.788805457 | 0.000000000 | 14.999845281 |
| 2.789443272 | 8.362006774 | 18.902500017 |
| 4.181487109 | 1.393872006 | 16.955755055 |
| 5.577694693 | 0.000000000 | 14.999845281 |
| 5.575318472 | 8.364843777 | 18.910529378 |
| 6.970749109 | 1.393399255 | 16.941965927 |
| 0.000000000 | 2.788805457 | 14.999845281 |
| 8.354827245 | 2.787064308 | 18.898720415 |
| 1.400932599 | 4.182326142 | 16.959025210 |
| 2.788805457 | 2.788805457 | 14.999845281 |
| 2.788869538 | 2.751646149 | 18.959285715 |
| 4.177743002 | 4.182460287 | 16.960244478 |
| 5.577694693 | 2.788805457 | 14.999845281 |
| 5.591392497 | 2.782863159 | 18.897520791 |
| 6.971828757 | 4.183201578 | 16.940383890 |
| 0.000000000 | 5.577694693 | 14.999845281 |
| 8.355395743 | 5.576782603 | 18.899800863 |
| 1.397867324 | 6.967153610 | 16.956963847 |
| 2.788805457 | 5.577694693 | 14.999845281 |



|             |             |              |
|-------------|-------------|--------------|
| 2.787355539 | 5.602720563 | 18.970012921 |
| 4.180596462 | 6.967489722 | 16.958369083 |
| 5.577694693 | 5.577694693 | 14.999845281 |
| 5.590840955 | 5.579583701 | 18.901541365 |
| 6.970215519 | 6.971461228 | 16.943034588 |
| 2.827095777 | 4.171493516 | 19.979565985 |
| 5.774316130 | 5.200539808 | 22.986182740 |
| 5.031166868 | 6.591684770 | 23.034856569 |
| 3.552852497 | 4.894496513 | 22.894463884 |
| 7.116975214 | 4.237217344 | 21.340511988 |
| 2.636932275 | 4.456111925 | 21.709303405 |
| 5.163171552 | 8.276122718 | 21.447891439 |
| 4.275692176 | 0.369573014 | 22.642377816 |
| 7.948859995 | 4.897521021 | 22.470902294 |
| 5.013553411 | 5.673711473 | 23.418560780 |
| 2.687325364 | 4.437752938 | 22.677651478 |
| 7.173333789 | 4.324762510 | 22.321520286 |
| 5.105866478 | 8.265684800 | 22.436699912 |

**Pt(100)\_Volmer**

**1.0**

|              |              |               |
|--------------|--------------|---------------|
| 8.3664999008 | 0.0000000000 | 0.0000000000  |
| 0.0000000000 | 8.3664999008 | 0.0000000000  |
| 0.0000000000 | 0.0000000000 | 43.9440002441 |

**Pt O H**

**27 4 9**

## Cartesian

|             |             |              |
|-------------|-------------|--------------|
| 0.000000000 | 0.000000000 | 14.999845281 |
| 8.363818486 | 8.363645942 | 18.894719486 |
| 1.403609774 | 1.404882786 | 16.961420529 |
| 2.788805457 | 0.000000000 | 14.999845281 |
| 2.787735534 | 0.011326039 | 18.893739880 |
| 4.177357272 | 1.404161816 | 16.964258504 |
| 5.577694693 | 0.000000000 | 14.999845281 |
| 5.578477624 | 8.360740619 | 18.910825355 |
| 6.970376095 | 1.392669434 | 16.949195102 |
| 0.000000000 | 2.788805457 | 14.999845281 |
| 0.003526560 | 2.787253059 | 18.897622943 |
| 1.403498818 | 4.175788417 | 16.961533157 |
| 2.788805457 | 2.788805457 | 14.999845281 |
| 2.794357287 | 2.797373566 | 19.030546790 |
| 4.177381208 | 4.176971291 | 16.963711078 |
| 5.577694693 | 2.788805457 | 14.999845281 |
| 5.579419635 | 2.789332814 | 18.901025370 |
| 6.971154039 | 4.183799498 | 16.949277609 |
| 0.000000000 | 5.577694693 | 14.999845281 |
| 8.363045529 | 5.580488810 | 18.893928467 |
| 1.393657074 | 6.973840939 | 16.945628971 |
| 2.788805457 | 5.577694693 | 14.999845281 |
| 2.788483308 | 5.579599161 | 18.892067478 |
| 4.184668701 | 6.974603425 | 16.948451231 |
| 5.577694693 | 5.577694693 | 14.999845281 |

|             |             |              |
|-------------|-------------|--------------|
| 5.578617255 | 5.586872940 | 18.908474564 |
| 6.969420620 | 6.972313974 | 16.945056661 |
| 4.917033959 | 4.139169930 | 22.979176202 |
| 2.839850074 | 2.997215493 | 22.074921581 |
| 7.143514584 | 2.853919646 | 22.130164531 |
| 5.115221757 | 6.735127728 | 22.180360155 |
| 5.742411935 | 3.686042050 | 22.630384194 |
| 4.965349787 | 5.083500579 | 22.645926922 |
| 2.873525837 | 2.066614689 | 22.376564172 |
| 3.731142873 | 3.463764159 | 22.399967318 |
| 7.084329478 | 2.746841096 | 21.140994599 |
| 2.848469548 | 2.927441368 | 20.750134552 |
| 5.199917452 | 6.749352640 | 21.188918009 |
| 4.282936034 | 7.212545673 | 22.361464100 |
| 7.905549442 | 3.452389965 | 22.253236007 |

**Pt(100)\_Heyrovsky**

**1.0**

|              |              |               |
|--------------|--------------|---------------|
| 8.3664999008 | 0.0000000000 | 0.0000000000  |
| 0.0000000000 | 8.3664999008 | 0.0000000000  |
| 0.0000000000 | 0.0000000000 | 43.9440002441 |

**Pt H O**

**27 10 4**

**Cartesian**

|             |             |              |
|-------------|-------------|--------------|
| 0.000000000 | 0.000000000 | 14.999845281 |
| 0.000421779 | 0.001819618 | 18.890053262 |

|             |             |              |
|-------------|-------------|--------------|
| 1.404791153 | 1.407436163 | 16.963565708 |
| 2.788805457 | 0.000000000 | 14.999845281 |
| 2.788344425 | 8.352574698 | 18.888805182 |
| 4.172924984 | 1.406649617 | 16.963612855 |
| 5.577694693 | 0.000000000 | 14.999845281 |
| 5.576858403 | 0.001153510 | 18.893357467 |
| 6.971528051 | 1.393417706 | 16.941694833 |
| 0.000000000 | 2.788805457 | 14.999845281 |
| 8.348937309 | 2.789997308 | 18.895125472 |
| 1.404227392 | 4.173277303 | 16.963124362 |
| 2.788805457 | 2.788805457 | 14.999845281 |
| 2.784378156 | 2.785857996 | 19.032105253 |
| 4.173238405 | 4.173743321 | 16.963603688 |
| 5.577694693 | 2.788805457 | 14.999845281 |
| 5.593391216 | 2.790084078 | 18.891696852 |
| 6.971537027 | 4.186077977 | 16.942191184 |
| 0.000000000 | 5.577694693 | 14.999845281 |
| 0.000372009 | 5.578821715 | 18.890651765 |
| 1.391975019 | 6.972956277 | 16.939748718 |
| 2.788805457 | 5.577694693 | 14.999845281 |
| 2.788191579 | 5.595501140 | 18.887470665 |
| 4.186090943 | 6.972847066 | 16.940728323 |
| 5.577694693 | 5.577694693 | 14.999845281 |
| 5.576594600 | 5.579299951 | 18.894174678 |
| 6.971347029 | 6.972519930 | 16.944142537 |
| 2.823303298 | 2.844182626 | 20.818042966 |

|             |             |              |
|-------------|-------------|--------------|
| 5.778427266 | 3.710739289 | 23.734646007 |
| 5.016860672 | 5.105941779 | 23.754830075 |
| 2.867185841 | 2.020155206 | 23.523674565 |
| 3.625720946 | 3.416926426 | 23.575263639 |
| 7.105954834 | 2.671225158 | 22.223784975 |
| 2.804271090 | 2.902405524 | 21.659238745 |
| 5.213691056 | 6.811717842 | 22.273014089 |
| 4.273686975 | 7.231451715 | 23.432068338 |
| 7.953794456 | 3.461441048 | 23.253808916 |
| 4.968553322 | 4.169152702 | 24.092786177 |
| 2.754151030 | 2.964788929 | 23.294315873 |
| 7.192774916 | 2.855985686 | 23.179261972 |
| 5.113150729 | 6.772311971 | 23.243507341 |

**Ir(100)\_Rf\_sur**

**1.0**

|              |              |               |
|--------------|--------------|---------------|
| 8.2730998993 | 0.0000000000 | 0.0000000000  |
| 0.0000000000 | 8.2730998993 | 0.0000000000  |
| 0.0000000000 | 0.0000000000 | 43.9000015259 |

**Ir H O**

**27 8 4**

**Cartesian**

|             |             |              |
|-------------|-------------|--------------|
| 0.000000000 | 0.000000000 | 15.000191691 |
| 0.001270117 | 0.000914533 | 18.672316610 |
| 1.378100859 | 1.378408686 | 16.835456074 |
| 2.757672434 | 0.000000000 | 15.000191691 |

|             |             |              |
|-------------|-------------|--------------|
| 2.757333417 | 0.001771657 | 18.669261678 |
| 4.139895243 | 1.380643114 | 16.837320433 |
| 5.515427712 | 0.000000000 | 15.000191691 |
| 5.513873906 | 8.268339365 | 18.676407733 |
| 6.891972546 | 1.378518404 | 16.838168226 |
| 0.000000000 | 2.757672434 | 15.000191691 |
| 8.271245786 | 2.756673876 | 18.675253793 |
| 1.378238068 | 4.137784710 | 16.836681972 |
| 2.757672434 | 2.757672434 | 15.000191691 |
| 2.756013841 | 2.757198304 | 18.673365884 |
| 4.139192061 | 4.134642334 | 16.837736480 |
| 5.515427712 | 2.757672434 | 15.000191691 |
| 5.518593511 | 2.757273011 | 18.676691639 |
| 6.892822183 | 4.136611589 | 16.838677163 |
| 0.000000000 | 5.515427712 | 15.000191691 |
| 0.000656024 | 5.515141705 | 18.672315302 |
| 1.377683807 | 6.893777840 | 16.836921395 |
| 2.757672434 | 5.515427712 | 15.000191691 |
| 2.758328277 | 5.514565253 | 18.670286094 |
| 4.136492502 | 6.894385358 | 16.836171726 |
| 5.515427712 | 5.515427712 | 15.000191691 |
| 5.513372408 | 5.520724262 | 18.676299142 |
| 6.895485498 | 6.894150142 | 16.837221001 |
| 5.770628625 | 3.491484038 | 23.244153634 |
| 5.039762891 | 4.889942171 | 23.284523218 |
| 3.568396692 | 3.192306127 | 23.125494062 |

|             |             |              |
|-------------|-------------|--------------|
| 7.110301758 | 2.567480375 | 21.589891675 |
| 2.700513481 | 2.720843387 | 21.911540021 |
| 5.138531889 | 6.582586164 | 21.700993070 |
| 4.271282824 | 7.005934916 | 22.917740379 |
| 7.922926482 | 3.212863113 | 22.745120374 |
| 5.008318415 | 3.971874382 | 23.665836281 |
| 2.717524969 | 2.720398844 | 22.877462378 |
| 7.162728777 | 2.626682057 | 22.569151065 |
| 5.106099211 | 6.559622776 | 22.680913164 |

**Ir(100)\_Rf\_top**

**1.0**

|              |              |               |
|--------------|--------------|---------------|
| 8.2730998993 | 0.0000000000 | 0.0000000000  |
| 0.0000000000 | 8.2730998993 | 0.0000000000  |
| 0.0000000000 | 0.0000000000 | 43.9000015259 |

**Ir H O**

**27 9 4**

**Cartesian**

|             |             |              |
|-------------|-------------|--------------|
| 0.000000000 | 0.000000000 | 15.000191691 |
| 8.268804373 | 8.268186993 | 18.663499828 |
| 1.390919018 | 1.392337957 | 16.847993724 |
| 2.757672434 | 0.000000000 | 15.000191691 |
| 2.757676379 | 8.252789964 | 18.666405611 |
| 4.126432705 | 1.392687699 | 16.848013349 |
| 5.515427712 | 0.000000000 | 15.000191691 |
| 5.519535854 | 8.263154752 | 18.667030989 |

|             |             |              |
|-------------|-------------|--------------|
| 6.892761530 | 1.376870537 | 16.829966355 |
| 0.000000000 | 2.757672434 | 15.000191691 |
| 8.250202589 | 2.756595717 | 18.673771464 |
| 1.391170384 | 4.123511738 | 16.849207847 |
| 2.757672434 | 2.757672434 | 15.000191691 |
| 2.758589628 | 2.756999825 | 18.723536108 |
| 4.125850336 | 4.122435760 | 16.848654427 |
| 5.515427712 | 2.757672434 | 15.000191691 |
| 5.539645091 | 2.757176853 | 18.673346260 |
| 6.893483944 | 4.138467181 | 16.830439968 |
| 0.000000000 | 5.515427712 | 15.000191691 |
| 8.268364021 | 5.520918549 | 18.663354604 |
| 1.375771136 | 6.893870053 | 16.828510193 |
| 2.757672434 | 5.515427712 | 15.000191691 |
| 2.758577054 | 5.536237665 | 18.667292654 |
| 4.139194033 | 6.894394728 | 16.827678100 |
| 5.515427712 | 5.515427712 | 15.000191691 |
| 5.519037315 | 5.525810745 | 18.667219388 |
| 6.895542700 | 6.893986921 | 16.820641944 |
| 2.802478112 | 2.756472438 | 20.329356137 |
| 5.768760705 | 3.488999477 | 23.249266556 |
| 5.038971441 | 4.892537436 | 23.288411551 |
| 3.575033776 | 3.194620070 | 23.136502283 |
| 7.109935373 | 2.557735186 | 21.618507293 |
| 2.700523343 | 2.722289201 | 21.926312285 |
| 5.146814252 | 6.586251489 | 21.727600415 |



|             |             |              |
|-------------|-------------|--------------|
| 4.267278236 | 6.994921681 | 22.938984911 |
| 7.911511358 | 3.225671779 | 22.766877769 |
| 5.007273011 | 3.973491306 | 23.668049961 |
| 2.722654599 | 2.720088674 | 22.896605745 |
| 7.161319947 | 2.625163016 | 22.596801143 |
| 5.109868090 | 6.561094725 | 22.706762990 |

**Ir(100)\_Rf\_min**

1.0

|              |              |               |
|--------------|--------------|---------------|
| 8.2730998993 | 0.0000000000 | 0.0000000000  |
| 0.0000000000 | 8.2730998993 | 0.0000000000  |
| 0.0000000000 | 0.0000000000 | 43.9000015259 |

**Ir H O**

27 9 4

**Cartesian**

|             |             |              |
|-------------|-------------|--------------|
| 0.000000000 | 0.000000000 | 15.000191691 |
| 8.271389776 | 8.272692093 | 18.661494171 |
| 1.381484122 | 1.382696076 | 16.835576440 |
| 2.757672434 | 0.000000000 | 15.000191691 |
| 2.760934884 | 8.272827700 | 18.666553452 |
| 4.133390807 | 1.387507154 | 16.833379767 |
| 5.515427712 | 0.000000000 | 15.000191691 |
| 5.514221059 | 8.271435636 | 18.659470196 |
| 6.897255289 | 1.379180905 | 16.824654568 |
| 0.000000000 | 2.757672434 | 15.000191691 |
| 8.254490225 | 2.756136380 | 18.667912798 |

|             |             |              |
|-------------|-------------|--------------|
| 1.379473445 | 4.135866985 | 16.834893496 |
| 2.757672434 | 2.757672434 | 15.000191691 |
| 2.758508018 | 2.731269321 | 18.692886049 |
| 4.140011125 | 4.136772345 | 16.836302559 |
| 5.515427712 | 2.757672434 | 15.000191691 |
| 5.536110442 | 2.751255280 | 18.667737483 |
| 6.890867475 | 4.137465171 | 16.825728700 |
| 0.000000000 | 5.515427712 | 15.000191691 |
| 8.257528801 | 5.518670437 | 18.665897982 |
| 1.380674057 | 6.890618945 | 16.833956737 |
| 2.757672434 | 5.515427712 | 15.000191691 |
| 2.756936953 | 5.542705364 | 18.691915274 |
| 4.134443362 | 6.885823399 | 16.833212302 |
| 5.515427712 | 5.515427712 | 15.000191691 |
| 5.534367773 | 5.523985726 | 18.670821198 |
| 6.895928316 | 6.894402617 | 16.824928007 |
| 2.804343320 | 4.135866985 | 19.792647129 |
| 5.784924527 | 4.869143066 | 22.736208085 |
| 5.052313165 | 6.267249855 | 22.778215687 |
| 3.587135809 | 4.569968607 | 22.648265297 |
| 7.121640448 | 3.939378091 | 21.095565757 |
| 2.695367578 | 4.086132867 | 21.462124873 |
| 5.153709481 | 7.949255874 | 21.208451704 |
| 4.280261465 | 0.109254707 | 22.421726726 |
| 7.937366867 | 4.589069916 | 22.247319554 |
| 5.030150104 | 5.352356987 | 23.169806928 |

|             |             |              |
|-------------|-------------|--------------|
| 2.728229266 | 4.098818009 | 22.431651657 |
| 7.174315012 | 4.003923417 | 22.080427383 |
| 5.120404975 | 7.939159340 | 22.198767724 |

**Ir(100)\_Volmer**

**1.0**

|              |              |               |
|--------------|--------------|---------------|
| 8.2730998993 | 0.0000000000 | 0.0000000000  |
| 0.0000000000 | 8.2730998993 | 0.0000000000  |
| 0.0000000000 | 0.0000000000 | 43.9000015259 |

**Ir O H**

**27 4 9**

**Cartesian**

|             |             |              |
|-------------|-------------|--------------|
| 0.000000000 | 0.000000000 | 15.000191691 |
| 8.269768906 | 8.267445348 | 18.661513795 |
| 1.384057814 | 1.381152749 | 16.842837627 |
| 2.757672434 | 0.000000000 | 15.000191691 |
| 2.756802086 | 8.264626701 | 18.669819023 |
| 4.133935453 | 1.381885025 | 16.844204824 |
| 5.515427712 | 0.000000000 | 15.000191691 |
| 5.519332691 | 8.263521630 | 18.665238588 |
| 6.893103752 | 1.380962406 | 16.830701632 |
| 0.000000000 | 2.757672434 | 15.000191691 |
| 8.260819359 | 2.757039767 | 18.666934173 |
| 1.384213268 | 4.134166724 | 16.843092750 |
| 2.757672434 | 2.757672434 | 15.000191691 |
| 2.757740977 | 2.762775683 | 18.690480044 |

|             |             |              |
|-------------|-------------|--------------|
| 4.132655079 | 4.132185634 | 16.842213557 |
| 5.515427712 | 2.757672434 | 15.000191691 |
| 5.528454829 | 2.757212111 | 18.668863948 |
| 6.895613708 | 4.132695515 | 16.829474426 |
| 0.000000000 | 5.515427712 | 15.000191691 |
| 8.267894575 | 5.521364325 | 18.660499846 |
| 1.381596429 | 6.894750264 | 16.831139920 |
| 2.757672434 | 5.515427712 | 15.000191691 |
| 2.757512172 | 5.525398994 | 18.669570442 |
| 4.131925762 | 6.895340029 | 16.830103729 |
| 5.515427712 | 5.515427712 | 15.000191691 |
| 5.520809571 | 5.525403432 | 18.657554813 |
| 6.895807009 | 6.895917960 | 16.820873517 |
| 4.804036082 | 4.023364483 | 22.721536562 |
| 2.711356098 | 2.876560778 | 21.816599019 |
| 7.046672147 | 2.723822296 | 21.909632488 |
| 4.995017126 | 6.632491393 | 21.937347981 |
| 5.633340427 | 3.569201949 | 22.389882169 |
| 4.860305456 | 4.968325788 | 22.396180431 |
| 2.757612521 | 1.936996619 | 22.087377189 |
| 3.598415325 | 3.334188678 | 22.144001365 |
| 6.980593234 | 2.616363129 | 20.921671447 |
| 2.742890320 | 2.836498375 | 20.461397227 |
| 5.088554173 | 6.654698342 | 20.948328508 |
| 4.150286166 | 7.091451444 | 22.110118442 |
| 7.799121533 | 3.335488037 | 22.029889521 |

**Ir(100)\_Heyrovsky**

**1.0**

|                     |                     |                      |
|---------------------|---------------------|----------------------|
| <b>8.2730998993</b> | <b>0.0000000000</b> | <b>0.0000000000</b>  |
| <b>0.0000000000</b> | <b>8.2730998993</b> | <b>0.0000000000</b>  |
| <b>0.0000000000</b> | <b>0.0000000000</b> | <b>43.9000015259</b> |

**Ir H O**

**27 10 4**

**Cartesian**

|                    |                    |                     |
|--------------------|--------------------|---------------------|
| <b>0.000000000</b> | <b>0.000000000</b> | <b>15.000191691</b> |
| <b>0.002745501</b> | <b>0.001586902</b> | <b>18.663977366</b> |
| <b>1.397453411</b> | <b>1.399415639</b> | <b>16.848599477</b> |
| <b>2.757672434</b> | <b>0.000000000</b> | <b>15.000191691</b> |
| <b>2.757123350</b> | <b>8.241237262</b> | <b>18.658645954</b> |
| <b>4.119550543</b> | <b>1.400452661</b> | <b>16.850050406</b> |
| <b>5.515427712</b> | <b>0.000000000</b> | <b>15.000191691</b> |
| <b>5.512125812</b> | <b>8.269946921</b> | <b>18.669062813</b> |
| <b>6.892303426</b> | <b>1.363993080</b> | <b>16.824051431</b> |
| <b>0.000000000</b> | <b>2.757672434</b> | <b>15.000191691</b> |
| <b>8.236625649</b> | <b>2.757134199</b> | <b>18.666802033</b> |
| <b>1.397359226</b> | <b>4.116791811</b> | <b>16.849303354</b> |
| <b>2.757672434</b> | <b>2.757672434</b> | <b>15.000191691</b> |
| <b>2.757927868</b> | <b>2.757527705</b> | <b>18.750762289</b> |
| <b>4.119454139</b> | <b>4.115216308</b> | <b>16.850322537</b> |
| <b>5.515427712</b> | <b>2.757672434</b> | <b>15.000191691</b> |
| <b>5.550627753</b> | <b>2.757368675</b> | <b>18.668459677</b> |

|             |             |              |
|-------------|-------------|--------------|
| 6.892647620 | 4.151745294 | 16.824555135 |
| 0.000000000 | 5.515427712 | 15.000191691 |
| 0.002545301 | 5.514644645 | 18.663749718 |
| 1.362378621 | 6.894149649 | 16.821803734 |
| 2.757672434 | 5.515427712 | 15.000191691 |
| 2.757689693 | 5.548694741 | 18.659322356 |
| 4.152242354 | 6.894451929 | 16.821430863 |
| 5.515427712 | 5.515427712 | 15.000191691 |
| 5.511553306 | 5.519650750 | 18.669235512 |
| 6.894569783 | 6.894157539 | 16.829053146 |
| 2.698347473 | 2.776159569 | 20.566293251 |
| 5.721725899 | 3.568429978 | 23.293733804 |
| 4.956614795 | 4.954264115 | 23.326473254 |
| 2.812480214 | 1.844933740 | 23.261604033 |
| 3.571605886 | 3.244721312 | 23.283903073 |
| 7.058816588 | 2.613860323 | 21.646653224 |
| 2.721769704 | 2.773626190 | 21.410495870 |
| 5.084448002 | 6.652041930 | 21.731552856 |
| 4.223681430 | 7.120099956 | 22.937103544 |
| 7.900433033 | 3.246182412 | 22.787562340 |
| 4.946409284 | 4.035452708 | 23.710533793 |
| 2.698818398 | 2.787342435 | 23.021265282 |
| 7.112145515 | 2.693573871 | 22.624985015 |
| 5.033173393 | 6.623548749 | 22.710941770 |

**Rh(100)\_Rf\_sur**

1.0

|              |              |               |
|--------------|--------------|---------------|
| 8.0700998306 | 0.0000000000 | 0.0000000000  |
| 0.0000000000 | 8.0700998306 | 0.0000000000  |
| 0.0000000000 | 0.0000000000 | 43.8042984009 |

Rh H O

27 8 4

Cartesian

|             |             |              |
|-------------|-------------|--------------|
| 0.000000000 | 0.000000000 | 14.999905706 |
| 8.069786690 | 0.000005189 | 18.717768880 |
| 1.345144148 | 1.344711594 | 16.860063129 |
| 2.690006420 | 0.000000000 | 14.999905706 |
| 2.690266650 | 0.000379998 | 18.718485583 |
| 4.036002807 | 1.345767303 | 16.860368609 |
| 5.380093651 | 0.000000000 | 14.999905706 |
| 5.379127772 | 8.065036181 | 18.720447704 |
| 6.724259052 | 1.345636106 | 16.860204120 |
| 0.000000000 | 2.690006420 | 14.999905706 |
| 8.066396974 | 2.690025901 | 18.720234913 |
| 1.345370225 | 4.035455411 | 16.860239368 |
| 2.690006420 | 2.690006420 | 14.999905706 |
| 2.689632190 | 2.690169725 | 18.718067833 |
| 4.035567969 | 4.034138632 | 16.859821617 |
| 5.380093651 | 2.690006420 | 14.999905706 |
| 5.383583418 | 2.690103585 | 18.723091281 |
| 6.724626067 | 4.034046998 | 16.859719791 |
| 0.000000000 | 5.380093651 | 14.999905706 |

|             |             |              |
|-------------|-------------|--------------|
| 8.069295573 | 5.379746358 | 18.717831543 |
| 1.344954868 | 6.724854069 | 16.860360776 |
| 2.690006420 | 5.380093651 | 14.999905706 |
| 2.690691627 | 5.379400989 | 18.719584789 |
| 4.034344025 | 6.724966145 | 16.859629713 |
| 5.380093651 | 5.380093651 | 14.999905706 |
| 5.379183089 | 5.384690715 | 18.719238839 |
| 6.725364907 | 6.725072931 | 16.858577505 |
| 5.686618812 | 3.549179112 | 23.215543225 |
| 4.961224449 | 4.948234146 | 23.243490723 |
| 3.491713641 | 3.274172728 | 23.059696238 |
| 7.031988676 | 2.680191781 | 21.547757224 |
| 2.674838561 | 2.808115671 | 21.808616204 |
| 5.005101715 | 6.598840050 | 21.619256501 |
| 4.254688778 | 7.088916853 | 22.889700568 |
| 7.841894565 | 3.256561069 | 22.743038867 |
| 4.923082330 | 4.033009448 | 23.630891504 |
| 2.641813484 | 2.818145084 | 22.774764394 |
| 7.073662891 | 2.692954323 | 22.529356955 |
| 5.047575859 | 6.597540828 | 22.598763564 |

**Rh(100)\_Rf\_top**

**1.0**

|              |              |               |
|--------------|--------------|---------------|
| 8.0700998306 | 0.0000000000 | 0.0000000000  |
| 0.0000000000 | 8.0700998306 | 0.0000000000  |
| 0.0000000000 | 0.0000000000 | 43.8042984009 |



**Rh H O**

**27 9 4**

**Cartesian**

|                    |                    |                     |
|--------------------|--------------------|---------------------|
| <b>0.000000000</b> | <b>0.000000000</b> | <b>14.999905706</b> |
| <b>8.062950979</b> | <b>8.064584027</b> | <b>18.710618822</b> |
| <b>1.343342264</b> | <b>1.344915665</b> | <b>16.855517483</b> |
| <b>2.690006420</b> | <b>0.000000000</b> | <b>14.999905706</b> |
| <b>2.690170687</b> | <b>8.068991090</b> | <b>18.711855102</b> |
| <b>4.037391979</b> | <b>1.346578776</b> | <b>16.856141498</b> |
| <b>5.380093651</b> | <b>0.000000000</b> | <b>14.999905706</b> |
| <b>5.385449758</b> | <b>8.060026405</b> | <b>18.713189292</b> |
| <b>6.724289837</b> | <b>1.346597055</b> | <b>16.857666287</b> |
| <b>0.000000000</b> | <b>2.690006420</b> | <b>14.999905706</b> |
| <b>8.064072226</b> | <b>2.689999686</b> | <b>18.713873358</b> |
| <b>1.346488947</b> | <b>4.036488632</b> | <b>16.859469140</b> |
| <b>2.690006420</b> | <b>2.690006420</b> | <b>14.999905706</b> |
| <b>2.688496513</b> | <b>2.686346614</b> | <b>18.727762252</b> |
| <b>4.034253354</b> | <b>4.034690597</b> | <b>16.859662350</b> |
| <b>5.380093651</b> | <b>2.690006420</b> | <b>14.999905706</b> |
| <b>5.385235706</b> | <b>2.690203637</b> | <b>18.716387693</b> |
| <b>6.724705916</b> | <b>4.031504591</b> | <b>16.858521369</b> |
| <b>0.000000000</b> | <b>5.380093651</b> | <b>14.999905706</b> |
| <b>8.064176607</b> | <b>5.385321808</b> | <b>18.711332914</b> |
| <b>1.346680992</b> | <b>6.725379818</b> | <b>16.858689775</b> |
| <b>2.690006420</b> | <b>5.380093651</b> | <b>14.999905706</b> |
| <b>2.690689703</b> | <b>5.382388576</b> | <b>18.714734968</b> |

|             |             |              |
|-------------|-------------|--------------|
| 4.032162861 | 6.725535667 | 16.858162365 |
| 5.380093651 | 5.380093651 | 14.999905706 |
| 5.383846533 | 5.389727909 | 18.712734989 |
| 6.725119108 | 6.724064722 | 16.847924871 |
| 2.647886304 | 2.426220202 | 20.291828675 |
| 5.684854928 | 3.548358018 | 23.216645042 |
| 4.959290286 | 4.948755567 | 23.246341869 |
| 3.500289665 | 3.272989430 | 23.072009429 |
| 7.028313237 | 2.678806216 | 21.567531175 |
| 2.682278186 | 2.809680655 | 21.819834106 |
| 5.010205289 | 6.595897679 | 21.637638821 |
| 4.255476200 | 7.076587465 | 22.908551553 |
| 7.821903082 | 3.271446092 | 22.764738386 |
| 4.926171412 | 4.034940484 | 23.637538956 |
| 2.647349009 | 2.822352766 | 22.792866039 |
| 7.071114472 | 2.685815814 | 22.548544750 |
| 5.054742989 | 6.598420605 | 22.617865198 |

**Rh(100)\_Rf\_min**

**1.0**

|              |              |               |
|--------------|--------------|---------------|
| 8.0700998306 | 0.0000000000 | 0.0000000000  |
| 0.0000000000 | 8.0700998306 | 0.0000000000  |
| 0.0000000000 | 0.0000000000 | 43.8042984009 |

**Rh H O**

**27 9 4**

**Cartesian**

|             |             |              |
|-------------|-------------|--------------|
| 0.000000000 | 0.000000000 | 14.999905706 |
| 8.064567191 | 8.069590916 | 18.697101987 |
| 1.348870574 | 1.345009944 | 16.851513607 |
| 2.690006420 | 0.000000000 | 14.999905706 |
| 2.686274221 | 8.070035856 | 18.700776885 |
| 4.031886517 | 1.344002097 | 16.845482337 |
| 5.380093651 | 0.000000000 | 14.999905706 |
| 5.384001420 | 8.069507701 | 18.689378828 |
| 6.719780318 | 1.346044729 | 16.849751223 |
| 0.000000000 | 2.690006420 | 14.999905706 |
| 8.069058913 | 2.687979421 | 18.688984576 |
| 1.341209081 | 4.035639159 | 16.846197734 |
| 2.690006420 | 2.690006420 | 14.999905706 |
| 2.685570255 | 2.686115246 | 18.709601861 |
| 4.036120175 | 4.035552576 | 16.820952559 |
| 5.380093651 | 2.690006420 | 14.999905706 |
| 5.382823895 | 2.685448558 | 18.711609674 |
| 6.727364488 | 4.035414044 | 16.846426191 |
| 0.000000000 | 5.380093651 | 14.999905706 |
| 8.069930032 | 5.378707845 | 18.702007943 |
| 1.346620745 | 6.722899703 | 16.854614098 |
| 2.690006420 | 5.380093651 | 14.999905706 |
| 2.686897136 | 5.384106763 | 18.710477831 |
| 4.033282424 | 6.727405374 | 16.845793039 |
| 5.380093651 | 5.380093651 | 14.999905706 |
| 5.382812350 | 5.384888413 | 18.712896867 |

|             |             |              |
|-------------|-------------|--------------|
| 6.722901627 | 6.720821235 | 16.851576270 |
| 4.029024716 | 4.024461563 | 19.254213845 |
| 7.066873839 | 4.789097405 | 22.380141754 |
| 6.303403738 | 6.172251994 | 22.405773349 |
| 4.844138077 | 4.493569700 | 22.275774664 |
| 0.312000981 | 3.870417092 | 20.788965944 |
| 3.955220353 | 3.989994402 | 21.093511166 |
| 6.444945415 | 7.800524832 | 20.851101086 |
| 5.595488514 | 0.266169830 | 22.046333121 |
| 1.220802139 | 4.448386959 | 21.910932401 |
| 6.284594110 | 5.252082938 | 22.786458793 |
| 3.973898423 | 4.036995623 | 22.063019636 |
| 0.398510073 | 3.936785437 | 21.780966353 |
| 6.399768927 | 7.820601454 | 21.846273787 |

**Rh(100)\_Volmer**

1.0

|              |              |               |
|--------------|--------------|---------------|
| 8.0700998306 | 0.0000000000 | 0.0000000000  |
| 0.0000000000 | 8.0700998306 | 0.0000000000  |
| 0.0000000000 | 0.0000000000 | 43.8042984009 |

**Rh O H**

27 4 9

**Cartesian**

|             |             |              |
|-------------|-------------|--------------|
| 0.000000000 | 0.000000000 | 14.999905706 |
| 8.068941064 | 8.069235927 | 18.706951757 |
| 1.347047405 | 1.343327112 | 16.856940445 |

|             |             |              |
|-------------|-------------|--------------|
| 2.690006420 | 0.000000000 | 14.999905706 |
| 2.691832355 | 0.005424422 | 18.712520892 |
| 4.036996104 | 1.346522618 | 16.858035735 |
| 5.380093651 | 0.000000000 | 14.999905706 |
| 5.384558917 | 8.062837941 | 18.707622769 |
| 6.725909416 | 1.350639989 | 16.854228985 |
| 0.000000000 | 2.690006420 | 14.999905706 |
| 8.069401396 | 2.690432840 | 18.703729858 |
| 1.347428249 | 4.038042312 | 16.856768123 |
| 2.690006420 | 2.690006420 | 14.999905706 |
| 2.701453625 | 2.707344381 | 18.718909861 |
| 4.038327554 | 4.036620431 | 16.856060559 |
| 5.380093651 | 2.690006420 | 14.999905706 |
| 5.388761068 | 2.691231807 | 18.715088751 |
| 6.726077291 | 4.033510906 | 16.854842555 |
| 0.000000000 | 5.380093651 | 14.999905706 |
| 8.067688019 | 5.385335276 | 18.705592763 |
| 1.349401976 | 6.727144183 | 16.857328170 |
| 2.690006420 | 5.380093651 | 14.999905706 |
| 2.691411707 | 5.383977370 | 18.711986954 |
| 4.032510394 | 6.727066258 | 16.856187189 |
| 5.380093651 | 5.380093651 | 14.999905706 |
| 5.386799006 | 5.392892991 | 18.707719374 |
| 6.726542914 | 6.726709345 | 16.846393555 |
| 4.910353219 | 4.141075818 | 22.701921789 |
| 2.814699330 | 2.990768295 | 21.799671125 |

|             |             |              |
|-------------|-------------|--------------|
| 7.165571953 | 2.850129002 | 21.912120379 |
| 5.120034581 | 6.751209385 | 21.936613604 |
| 5.747866507 | 3.691966379 | 22.384045109 |
| 4.972559097 | 5.088555007 | 22.384998102 |
| 2.860487670 | 2.057416049 | 22.094457960 |
| 3.704718819 | 3.452281920 | 22.107434330 |
| 7.062107939 | 2.698574267 | 20.930179920 |
| 2.808154634 | 2.911855067 | 20.441090873 |
| 5.207556782 | 6.776460771 | 20.943805109 |
| 4.272829794 | 7.204982510 | 22.113859853 |
| 7.925308894 | 3.461631898 | 21.971764684 |

#### Rh(100)\_Heyrovsky

1.0

|              |              |               |
|--------------|--------------|---------------|
| 8.0700998306 | 0.0000000000 | 0.0000000000  |
| 0.0000000000 | 8.0700998306 | 0.0000000000  |
| 0.0000000000 | 0.0000000000 | 43.8042984009 |

Rh H O

27 10 4

Cartesian

|              |              |              |
|--------------|--------------|--------------|
| 0.0000000000 | 0.0000000000 | 14.999905706 |
| 8.066644697  | 8.068472074  | 18.706020957 |
| 1.353026548  | 1.354665608  | 16.860627092 |
| 2.690006420  | 0.0000000000 | 14.999905706 |
| 2.690342650  | 8.057396213  | 18.700770358 |
| 4.027993900  | 1.355188712  | 16.860586623 |

|             |             |              |
|-------------|-------------|--------------|
| 5.380093651 | 0.000000000 | 14.999905706 |
| 5.382269765 | 8.064211240 | 18.709925618 |
| 6.724316293 | 1.342073465 | 16.850919619 |
| 0.000000000 | 2.690006420 | 14.999905706 |
| 8.052426843 | 2.690620917 | 18.706075787 |
| 1.352909541 | 4.027976102 | 16.860120570 |
| 2.690006420 | 2.690006420 | 14.999905706 |
| 2.689551620 | 2.697800073 | 18.791768132 |
| 4.028158407 | 4.027424618 | 16.860026576 |
| 5.380093651 | 2.690006420 | 14.999905706 |
| 5.397999931 | 2.690843387 | 18.706956979 |
| 6.724417788 | 4.038825405 | 16.850890898 |
| 0.000000000 | 5.380093651 | 14.999905706 |
| 8.066656722 | 5.384046155 | 18.705523573 |
| 1.340898705 | 6.726353394 | 16.849866104 |
| 2.690006420 | 5.380093651 | 14.999905706 |
| 2.690259675 | 5.397719018 | 18.701339542 |
| 4.038785000 | 6.726276431 | 16.850200305 |
| 5.380093651 | 5.380093651 | 14.999905706 |
| 5.382303436 | 5.388026076 | 18.709808125 |
| 6.725063310 | 6.725463996 | 16.843791753 |
| 2.693516630 | 2.590245743 | 20.549568888 |
| 5.690312530 | 3.566213311 | 23.353646267 |
| 4.929210948 | 4.958741448 | 23.372118665 |
| 2.754208993 | 1.922709480 | 23.172765590 |
| 3.571690875 | 3.299038099 | 23.197611292 |

|             |             |              |
|-------------|-------------|--------------|
| 7.035820445 | 2.581438110 | 21.780997684 |
| 2.713426340 | 2.762222951 | 21.390579963 |
| 5.098031492 | 6.654682094 | 21.833014130 |
| 4.221270711 | 7.095816538 | 23.037223880 |
| 7.874089409 | 3.303886975 | 22.869486674 |
| 4.886495816 | 4.025974357 | 23.722780914 |
| 2.691644278 | 2.860767380 | 22.896113036 |
| 7.102004802 | 2.717253780 | 22.748827320 |
| 5.038702567 | 6.611784657 | 22.808949427 |

**Pd(100)\_Rf\_sur**

**1.0**

|              |              |               |
|--------------|--------------|---------------|
| 8.2524003983 | 0.0000000000 | 0.0000000000  |
| 0.0000000000 | 8.2524003983 | 0.0000000000  |
| 0.0000000000 | 0.0000000000 | 43.8902015686 |

**Pd H O**

**27 8 4**

**Cartesian**

|             |             |              |
|-------------|-------------|--------------|
| 0.000000000 | 0.000000000 | 14.999915706 |
| 8.251368431 | 8.252280871 | 18.951102665 |
| 1.378426654 | 1.379015927 | 16.982075496 |
| 2.750772669 | 0.000000000 | 14.999915706 |
| 2.751202328 | 0.000311677 | 18.958022143 |
| 4.123534202 | 1.378935997 | 16.981868827 |
| 5.501627975 | 0.000000000 | 14.999915706 |
| 5.502376126 | 8.251480580 | 18.952026134 |



|             |             |              |
|-------------|-------------|--------------|
| 6.877103955 | 1.377791143 | 16.976797595 |
| 0.000000000 | 2.750772669 | 14.999915706 |
| 8.252296611 | 2.751016397 | 18.962734975 |
| 1.378637917 | 4.122883197 | 16.982219379 |
| 2.750772669 | 2.750772669 | 14.999915706 |
| 2.750941877 | 2.751176504 | 18.983276277 |
| 4.123279161 | 4.122834501 | 16.981764185 |
| 5.501627975 | 2.750772669 | 14.999915706 |
| 5.502656007 | 2.751215363 | 18.961415173 |
| 6.877270211 | 4.123861057 | 16.976487592 |
| 0.000000000 | 5.501627975 | 14.999915706 |
| 8.251381712 | 5.501949173 | 18.951157602 |
| 1.377281431 | 6.876798005 | 16.976539913 |
| 2.750772669 | 5.501627975 | 14.999915706 |
| 2.751294801 | 5.501143964 | 18.960368749 |
| 4.124353922 | 6.876836863 | 16.976487592 |
| 5.501627975 | 5.501627975 | 14.999915706 |
| 5.502273323 | 5.502366781 | 18.951377351 |
| 6.876988855 | 6.877056242 | 16.973933009 |
| 5.614525084 | 3.572947009 | 23.650361100 |
| 4.862731594 | 4.967569227 | 23.689301152 |
| 3.456302009 | 3.292311212 | 23.356491247 |
| 6.982382805 | 2.541900400 | 22.179470972 |
| 2.688604764 | 2.848035083 | 22.060945148 |
| 5.087515980 | 6.683142824 | 22.264976889 |
| 4.128178546 | 7.069437450 | 23.422026163 |

|             |             |              |
|-------------|-------------|--------------|
| 7.765691629 | 3.370349179 | 23.235406915 |
| 4.805442168 | 4.027090033 | 24.012421171 |
| 2.620440086 | 2.835097372 | 23.024063286 |
| 7.035436149 | 2.729819506 | 23.135128108 |
| 4.980818052 | 6.632592665 | 23.232134225 |

**Pd(100)\_Rf\_top**

1.0

|              |              |               |
|--------------|--------------|---------------|
| 8.2524003983 | 0.0000000000 | 0.0000000000  |
| 0.0000000000 | 8.2524003983 | 0.0000000000  |
| 0.0000000000 | 0.0000000000 | 43.8902015686 |

**Pd H O**

27 9 4

**Cartesian**

|             |             |              |
|-------------|-------------|--------------|
| 0.000000000 | 0.000000000 | 14.999915706 |
| 8.244056614 | 8.245387645 | 18.947480730 |
| 1.380570519 | 1.381765422 | 16.976794979 |
| 2.750772669 | 0.000000000 | 14.999915706 |
| 2.751096819 | 0.005713726 | 18.947342079 |
| 4.121100373 | 1.381591418 | 16.976712573 |
| 5.501627975 | 0.000000000 | 14.999915706 |
| 5.509256071 | 8.244386175 | 18.949395686 |
| 6.877008530 | 1.378604715 | 16.973425494 |
| 0.000000000 | 2.750772669 | 14.999915706 |
| 0.003765110 | 2.751073455 | 18.952803104 |
| 1.380880773 | 4.120427233 | 16.977061817 |

|             |             |              |
|-------------|-------------|--------------|
| 2.750772669 | 2.750772669 | 14.999915706 |
| 2.749151674 | 2.752372514 | 19.025231337 |
| 4.120767123 | 4.120504459 | 16.976734810 |
| 5.501627975 | 2.750772669 | 14.999915706 |
| 5.497708172 | 2.751281029 | 18.950490507 |
| 6.877132976 | 4.123354665 | 16.973259374 |
| 0.000000000 | 5.501627975 | 14.999915706 |
| 8.244135807 | 5.509431181 | 18.947280601 |
| 1.377749825 | 6.877118711 | 16.972669453 |
| 2.750772669 | 5.501627975 | 14.999915706 |
| 2.751146253 | 5.497580283 | 18.948298249 |
| 4.123856384 | 6.877120187 | 16.972882661 |
| 5.501627975 | 5.501627975 | 14.999915706 |
| 5.509142447 | 5.510107518 | 18.948690658 |
| 6.876803415 | 6.877108874 | 16.967906916 |
| 2.764594537 | 2.735627887 | 20.580664673 |
| 5.628564855 | 3.572386510 | 23.697047305 |
| 4.900849451 | 4.974701507 | 23.735869634 |
| 3.405168725 | 3.276616015 | 23.429565647 |
| 7.004660606 | 2.526168311 | 22.148583153 |
| 2.598343790 | 2.813081499 | 22.168700654 |
| 5.083122496 | 6.717028041 | 22.237063530 |
| 4.124469760 | 7.103940471 | 23.389652422 |
| 7.814574802 | 3.342268900 | 23.189272700 |
| 4.835391842 | 4.041221048 | 24.069341402 |
| 2.563108358 | 2.815269142 | 23.141982185 |

|             |             |              |
|-------------|-------------|--------------|
| 7.068232833 | 2.721292988 | 23.104470503 |
| 4.980165817 | 6.675615563 | 23.208466731 |

**Pd(100)\_Rf\_min**

**1.0**

|              |              |               |
|--------------|--------------|---------------|
| 8.2524003983 | 0.0000000000 | 0.0000000000  |
| 0.0000000000 | 8.2524003983 | 0.0000000000  |
| 0.0000000000 | 0.0000000000 | 43.8902015686 |

**Pd H O**

**27 9 4**

**Cartesian**

|             |             |              |
|-------------|-------------|--------------|
| 0.000000000 | 0.000000000 | 14.999915706 |
| 8.243859370 | 0.002931677 | 18.964304611 |
| 1.372353886 | 1.369564058 | 16.974560864 |
| 2.750772669 | 0.000000000 | 14.999915706 |
| 2.748142334 | 8.252012304 | 18.945412735 |
| 4.123354419 | 1.370086190 | 16.965026634 |
| 5.501627975 | 0.000000000 | 14.999915706 |
| 5.502629937 | 0.001219840 | 18.934940647 |
| 6.877565340 | 1.372724273 | 16.973140343 |
| 0.000000000 | 2.750772669 | 14.999915706 |
| 8.252008861 | 2.750045669 | 18.940159686 |
| 1.368164778 | 4.127650757 | 16.966597578 |
| 2.750772669 | 2.750772669 | 14.999915706 |
| 2.747849172 | 2.751246105 | 18.953225597 |
| 4.127825867 | 4.126663060 | 16.946125601 |

|             |             |              |
|-------------|-------------|--------------|
| 5.501627975 | 2.750772669 | 14.999915706 |
| 5.500993448 | 2.749019112 | 18.963964523 |
| 6.882061136 | 4.127254793 | 16.969177013 |
| 0.000000000 | 5.501627975 | 14.999915706 |
| 0.000125281 | 5.503092306 | 18.952593819 |
| 1.371473172 | 6.879909646 | 16.979097112 |
| 2.750772669 | 5.501627975 | 14.999915706 |
| 2.750887524 | 5.499180865 | 18.958973081 |
| 4.123976403 | 6.882438409 | 16.966745385 |
| 5.501627975 | 5.501627975 | 14.999915706 |
| 5.501958519 | 5.504567950 | 18.967467427 |
| 6.880167392 | 6.877737990 | 16.975728935 |
| 4.146676238 | 4.128571067 | 19.234671783 |
| 7.020874492 | 5.010694436 | 22.521690845 |
| 6.268876379 | 6.401271175 | 22.560207094 |
| 4.804721562 | 4.713185385 | 22.328570689 |
| 0.117497592 | 3.961598485 | 21.000221815 |
| 3.915184557 | 4.213253860 | 21.140647985 |
| 6.478033201 | 8.125989339 | 21.081893896 |
| 5.511137518 | 0.288781876 | 22.230361185 |
| 0.981597650 | 4.739861097 | 22.031286877 |
| 6.232872136 | 5.473015234 | 22.916221450 |
| 3.940534156 | 4.251183818 | 22.111343541 |
| 0.205970477 | 4.147978740 | 21.976446414 |
| 6.367581234 | 8.100462662 | 22.071725930 |

**Pd(100)\_Volmer**

**1.0**

|                     |                     |                      |
|---------------------|---------------------|----------------------|
| <b>8.2524003983</b> | <b>0.0000000000</b> | <b>0.0000000000</b>  |
| <b>0.0000000000</b> | <b>8.2524003983</b> | <b>0.0000000000</b>  |
| <b>0.0000000000</b> | <b>0.0000000000</b> | <b>43.8902015686</b> |

**Pd O H**

**27 4 9**

**Cartesian**

|                    |                    |                     |
|--------------------|--------------------|---------------------|
| <b>0.000000000</b> | <b>0.000000000</b> | <b>14.999915706</b> |
| <b>8.246327631</b> | <b>8.246336976</b> | <b>18.948711586</b> |
| <b>1.384283977</b> | <b>1.383852966</b> | <b>16.984751725</b> |
| <b>2.750772669</b> | <b>0.000000000</b> | <b>14.999915706</b> |
| <b>2.751980484</b> | <b>0.008856695</b> | <b>18.953767122</b> |
| <b>4.121263677</b> | <b>1.383732209</b> | <b>16.988317415</b> |
| <b>5.501627975</b> | <b>0.000000000</b> | <b>14.999915706</b> |
| <b>5.505912262</b> | <b>8.240325694</b> | <b>18.969214955</b> |
| <b>6.874519610</b> | <b>1.376681089</b> | <b>16.978457485</b> |
| <b>0.000000000</b> | <b>2.750772669</b> | <b>14.999915706</b> |
| <b>0.004437485</b> | <b>2.748290390</b> | <b>18.959399499</b> |
| <b>1.384567670</b> | <b>4.118299600</b> | <b>16.985318102</b> |
| <b>2.750772669</b> | <b>2.750772669</b> | <b>14.999915706</b> |
| <b>2.750222008</b> | <b>2.754640579</b> | <b>19.069173295</b> |
| <b>4.120456500</b> | <b>4.117883469</b> | <b>16.986650985</b> |
| <b>5.501627975</b> | <b>2.750772669</b> | <b>14.999915706</b> |
| <b>5.499863104</b> | <b>2.749493532</b> | <b>18.965195379</b> |
| <b>6.875775875</b> | <b>4.121410504</b> | <b>16.977043505</b> |

|             |             |              |
|-------------|-------------|--------------|
| 0.000000000 | 5.501627975 | 14.999915706 |
| 8.245454049 | 5.504935877 | 18.946603042 |
| 1.378012121 | 6.876893922 | 16.975455556 |
| 2.750772669 | 5.501627975 | 14.999915706 |
| 2.752674037 | 5.496966907 | 18.957636274 |
| 4.125582888 | 6.877666175 | 16.978083388 |
| 5.501627975 | 5.501627975 | 14.999915706 |
| 5.506063761 | 5.510544801 | 18.960782086 |
| 6.873856554 | 6.877126090 | 16.973981407 |
| 4.820862158 | 4.074545029 | 23.086231333 |
| 2.654789394 | 2.901916509 | 22.205940266 |
| 7.032407635 | 2.753666162 | 22.163601953 |
| 4.987497801 | 6.671911696 | 22.203355599 |
| 5.627588470 | 3.612462301 | 22.720676207 |
| 4.869541200 | 5.008052049 | 22.736281004 |
| 2.742870595 | 1.955305276 | 22.433296798 |
| 3.531455830 | 3.348658685 | 22.503326104 |
| 6.978641555 | 2.668457302 | 21.175159047 |
| 2.709344697 | 2.860835312 | 20.673397455 |
| 5.052647984 | 6.684969180 | 21.213711921 |
| 4.151705233 | 7.136045569 | 22.403099618 |
| 7.796649660 | 3.343261517 | 22.313996619 |

**Pd(100)\_Heyrovsky**

**1.0**

|              |              |              |
|--------------|--------------|--------------|
| 8.2524003983 | 0.0000000000 | 0.0000000000 |
|--------------|--------------|--------------|

|                     |                     |                      |
|---------------------|---------------------|----------------------|
| <b>0.0000000000</b> | <b>8.2524003983</b> | <b>0.0000000000</b>  |
| <b>0.0000000000</b> | <b>0.0000000000</b> | <b>43.8902015686</b> |

**Pd H O**

**27 10 4**

**Cartesian**

|                    |                    |                     |
|--------------------|--------------------|---------------------|
| <b>0.000000000</b> | <b>0.000000000</b> | <b>14.999915706</b> |
| <b>8.247345333</b> | <b>8.248732931</b> | <b>18.949100071</b> |
| <b>1.387505431</b> | <b>1.389235378</b> | <b>16.994011269</b> |
| <b>2.750772669</b> | <b>0.000000000</b> | <b>14.999915706</b> |
| <b>2.750777834</b> | <b>8.240533268</b> | <b>18.944218503</b> |
| <b>4.114396521</b> | <b>1.388941971</b> | <b>16.994036122</b> |
| <b>5.501627975</b> | <b>0.000000000</b> | <b>14.999915706</b> |
| <b>5.505609263</b> | <b>8.248005930</b> | <b>18.951999973</b> |
| <b>6.876838339</b> | <b>1.374468730</b> | <b>16.970676015</b> |
| <b>0.000000000</b> | <b>2.750772669</b> | <b>14.999915706</b> |
| <b>8.237689701</b> | <b>2.751447777</b> | <b>18.949699149</b> |
| <b>1.387537404</b> | <b>4.114318558</b> | <b>16.993682953</b> |
| <b>2.750772669</b> | <b>2.750772669</b> | <b>14.999915706</b> |
| <b>2.749928847</b> | <b>2.755833883</b> | <b>19.110225815</b> |
| <b>4.114348563</b> | <b>4.114549005</b> | <b>16.993611012</b> |
| <b>5.501627975</b> | <b>2.750772669</b> | <b>14.999915706</b> |
| <b>5.516793662</b> | <b>2.751620673</b> | <b>18.947891451</b> |
| <b>6.876878673</b> | <b>4.127702405</b> | <b>16.970560908</b> |
| <b>0.000000000</b> | <b>5.501627975</b> | <b>14.999915706</b> |
| <b>8.247443709</b> | <b>5.506527605</b> | <b>18.948850237</b> |
| <b>1.373428278</b> | <b>6.877757665</b> | <b>16.969400686</b> |



|             |             |              |
|-------------|-------------|--------------|
| 2.750772669 | 5.501627975 | 14.999915706 |
| 2.750769718 | 5.518495572 | 18.945376110 |
| 4.128188876 | 6.877670110 | 16.969929130 |
| 5.501627975 | 5.501627975 | 14.999915706 |
| 5.505492195 | 5.507020471 | 18.951901871 |
| 6.876337112 | 6.877162489 | 16.961061995 |
| 2.764751693 | 2.735007625 | 20.824450060 |
| 5.629395151 | 3.581154296 | 23.727801705 |
| 4.854042017 | 4.974698064 | 23.753028370 |
| 2.700887534 | 1.956010634 | 23.409144684 |
| 3.555310848 | 3.330353811 | 23.468615573 |
| 6.988545587 | 2.538802777 | 22.253447913 |
| 2.742662529 | 2.819683531 | 21.728866431 |
| 5.099418034 | 6.691026699 | 22.306954186 |
| 4.153916732 | 7.116501646 | 23.459870085 |
| 7.819055349 | 3.354090777 | 23.279911326 |
| 4.796214965 | 4.024153255 | 24.056023041 |
| 2.682479119 | 2.885732381 | 23.108041424 |
| 7.054378993 | 2.752660264 | 23.203647949 |
| 4.982177612 | 6.634184885 | 23.273154043 |

Ni(100)\_Rf\_sur

1.0

|              |              |               |
|--------------|--------------|---------------|
| 7.4579000473 | 0.0000000000 | 0.0000000000  |
| 0.0000000000 | 7.4579000473 | 0.0000000000  |
| 0.0000000000 | 0.0000000000 | 43.5157012939 |

Ni H O

27 8 4

Cartesian

|             |             |              |
|-------------|-------------|--------------|
| 0.000000000 | 0.000000000 | 14.999862612 |
| 7.456211740 | 7.457137686 | 18.411164877 |
| 1.245449383 | 1.245404042 | 16.708492652 |
| 2.485941863 | 0.000000000 | 14.999862612 |
| 2.486265033 | 0.003684260 | 18.421397173 |
| 3.726564255 | 1.246213300 | 16.707907765 |
| 4.971958406 | 0.000000000 | 14.999862612 |
| 4.973061274 | 7.456125502 | 18.409172887 |
| 6.214728079 | 1.246116950 | 16.706653692 |
| 0.000000000 | 2.485941863 | 14.999862612 |
| 0.002950960 | 2.486101448 | 18.420910847 |
| 1.245977702 | 3.726860087 | 16.708172326 |
| 2.485941863 | 2.485941863 | 14.999862612 |
| 2.485765386 | 2.486342158 | 18.433871756 |
| 3.726712060 | 3.726533361 | 16.708086732 |
| 4.971958406 | 2.485941863 | 14.999862612 |
| 4.969296588 | 2.485833843 | 18.421320658 |
| 6.214449806 | 3.725542736 | 16.706156991 |
| 0.000000000 | 4.971958406 | 14.999862612 |
| 7.455863232 | 4.972737215 | 18.409963977 |
| 1.245858236 | 6.215001018 | 16.707331955 |
| 2.485941863 | 4.971958406 | 14.999862612 |
| 2.486251920 | 4.969300589 | 18.421089815 |

|             |             |              |
|-------------|-------------|--------------|
| 3.725455164 | 6.214688072 | 16.706415068 |
| 4.971958406 | 4.971958406 | 14.999862612 |
| 4.972461165 | 4.972630529 | 18.408938153 |
| 6.214967678 | 6.214667179 | 16.699702475 |
| 5.447727363 | 3.094863316 | 23.322655327 |
| 4.663824899 | 4.461709386 | 23.319994151 |
| 3.136392443 | 2.884775905 | 22.921105791 |
| 6.793606944 | 1.984615803 | 21.814062135 |
| 2.438528997 | 2.504272316 | 21.564233299 |
| 4.929383089 | 6.170456897 | 21.810599495 |
| 3.982428678 | 6.652057139 | 22.939080395 |
| 0.470181883 | 2.444827923 | 22.777731740 |
| 4.598497879 | 3.514076629 | 23.618110606 |
| 2.287967327 | 2.517065093 | 22.520728625 |
| 6.956197029 | 2.249317615 | 22.738446985 |
| 4.797952462 | 6.141670316 | 22.776336309 |

Ni(100)\_Rf\_top

1.0

|              |              |               |
|--------------|--------------|---------------|
| 7.4579000473 | 0.0000000000 | 0.0000000000  |
| 0.0000000000 | 7.4579000473 | 0.0000000000  |
| 0.0000000000 | 0.0000000000 | 43.5157012939 |

Ni H O

27 9 4

Cartesian

|             |             |              |
|-------------|-------------|--------------|
| 0.000000000 | 0.000000000 | 14.999862612 |
|-------------|-------------|--------------|

|             |             |              |
|-------------|-------------|--------------|
| 7.452961814 | 7.453485465 | 18.404812813 |
| 1.245626305 | 1.245717432 | 16.700018911 |
| 2.485941863 | 0.000000000 | 14.999862612 |
| 2.486100559 | 0.005272041 | 18.420100304 |
| 3.726468682 | 1.246317653 | 16.699628553 |
| 4.971958406 | 0.000000000 | 14.999862612 |
| 4.976621479 | 7.452630642 | 18.403351242 |
| 6.214689405 | 1.248703310 | 16.707389017 |
| 0.000000000 | 2.485941863 | 14.999862612 |
| 0.004500495 | 2.486062330 | 18.419257340 |
| 1.246220746 | 3.726488908 | 16.699817896 |
| 2.485941863 | 2.485941863 | 14.999862612 |
| 2.485750495 | 2.486473960 | 18.455026282 |
| 3.726573368 | 3.726486908 | 16.699697287 |
| 4.971958406 | 2.485941863 | 14.999862612 |
| 4.967317560 | 2.485860293 | 18.420131429 |
| 6.214493814 | 3.722713998 | 16.706896207 |
| 0.000000000 | 4.971958406 | 14.999862612 |
| 7.452633309 | 4.976273860 | 18.403759755 |
| 1.248603292 | 6.215034357 | 16.707687297 |
| 2.485941863 | 4.971958406 | 14.999862612 |
| 2.486087890 | 4.967768754 | 18.419416854 |
| 3.722821795 | 6.214806316 | 16.707034972 |
| 4.971958406 | 4.971958406 | 14.999862612 |
| 4.975934242 | 4.976000477 | 18.403037399 |
| 6.214801870 | 6.214690739 | 16.695460416 |

|             |             |              |
|-------------|-------------|--------------|
| 2.498267221 | 2.483478525 | 19.940916486 |
| 5.447217937 | 3.094946442 | 23.324935222 |
| 4.663148331 | 4.461105276 | 23.323700603 |
| 3.136091943 | 2.885144639 | 22.924646243 |
| 6.795358819 | 1.987015574 | 21.813413701 |
| 2.436643098 | 2.502032797 | 21.563324194 |
| 4.928377573 | 6.171090346 | 21.810625432 |
| 3.983234158 | 6.652591903 | 22.940963448 |
| 0.468832859 | 2.444186918 | 22.782553499 |
| 4.602042080 | 3.515746489 | 23.628820150 |
| 2.287957325 | 2.516567224 | 22.527519030 |
| 6.955586251 | 2.245922551 | 22.740558288 |
| 4.798378762 | 6.144024967 | 22.777550178 |

Ni(100)\_Rf\_min

1.0

|              |              |               |
|--------------|--------------|---------------|
| 7.4579000473 | 0.0000000000 | 0.0000000000  |
| 0.0000000000 | 7.4579000473 | 0.0000000000  |
| 0.0000000000 | 0.0000000000 | 43.5157012939 |

Ni H O

27 9 4

Cartesian

|             |             |              |
|-------------|-------------|--------------|
| 0.000000000 | 0.000000000 | 14.999862612 |
| 7.450950336 | 0.002367616 | 18.408398656 |
| 1.247725465 | 1.246225525 | 16.708228091 |
| 2.485941863 | 0.000000000 | 14.999862612 |

|             |             |              |
|-------------|-------------|--------------|
| 2.487262326 | 0.000366276 | 18.409417995 |
| 3.729816848 | 1.239260033 | 16.701498638 |
| 4.971958406 | 0.000000000 | 14.999862612 |
| 4.978894782 | 7.457801807 | 18.416970960 |
| 6.207568107 | 1.248531279 | 16.708123045 |
| 0.000000000 | 2.485941863 | 14.999862612 |
| 0.001188378 | 2.483407623 | 18.413235977 |
| 1.235987992 | 3.730260485 | 16.699895708 |
| 2.485941863 | 2.485941863 | 14.999862612 |
| 2.477441202 | 2.483635887 | 18.427858174 |
| 3.731349128 | 3.728068307 | 16.682764069 |
| 4.971958406 | 2.485941863 | 14.999862612 |
| 4.976519682 | 2.481388366 | 18.436791008 |
| 6.219254238 | 3.729504347 | 16.701576450 |
| 0.000000000 | 4.971958406 | 14.999862612 |
| 0.000822456 | 4.965751497 | 18.429538917 |
| 1.245357255 | 6.208564289 | 16.714043252 |
| 2.485941863 | 4.971958406 | 14.999862612 |
| 2.484223550 | 4.973212857 | 18.427811487 |
| 3.729887083 | 6.219577408 | 16.700681611 |
| 4.971958406 | 4.971958406 | 14.999862612 |
| 4.975724871 | 4.976757948 | 18.435220500 |
| 6.212148498 | 6.206596374 | 16.712890335 |
| 3.737622716 | 3.725401377 | 18.912136278 |
| 6.708792371 | 4.334643555 | 22.396008737 |
| 5.924978812 | 5.701578975 | 22.390320670 |

|             |             |              |
|-------------|-------------|--------------|
| 4.409128245 | 4.134948483 | 22.058573809 |
| 0.600994175 | 3.263850790 | 20.880163454 |
| 3.666069894 | 3.741799477 | 20.730211684 |
| 6.175263107 | 7.406328423 | 20.870369500 |
| 5.250869253 | 0.435137022 | 22.021319951 |
| 1.731984525 | 3.690756616 | 21.864173152 |
| 5.868559638 | 4.759843737 | 22.707900534 |
| 3.547057753 | 3.757877519 | 21.696066513 |
| 0.762780613 | 3.469672979 | 21.828182444 |
| 6.066405484 | 7.385536188 | 21.851689491 |

**Ni(100)\_Volmer**

**1.0**

|              |              |               |
|--------------|--------------|---------------|
| 7.4579000473 | 0.0000000000 | 0.0000000000  |
| 0.0000000000 | 7.4579000473 | 0.0000000000  |
| 0.0000000000 | 0.0000000000 | 43.5157012939 |

**Ni O H**

**27 4 9**

**Cartesian**

|             |             |              |
|-------------|-------------|--------------|
| 0.000000000 | 0.000000000 | 14.999862612 |
| 7.454207819 | 0.001180415 | 18.417444317 |
| 1.247136246 | 1.239990277 | 16.706186819 |
| 2.485941863 | 0.000000000 | 14.999862612 |
| 2.489203791 | 0.006422732 | 18.422238841 |
| 3.730625885 | 1.244843273 | 16.708110076 |
| 4.971958406 | 0.000000000 | 14.999862612 |

|             |             |              |
|-------------|-------------|--------------|
| 4.975348802 | 7.451958964 | 18.414982859 |
| 6.214592499 | 1.247737134 | 16.707573172 |
| 0.000000000 | 2.485941863 | 14.999862612 |
| 0.009761985 | 2.485914969 | 18.406131729 |
| 1.247865602 | 3.731629179 | 16.704590374 |
| 2.485941863 | 2.485941863 | 14.999862612 |
| 2.488888845 | 2.495240225 | 18.446591447 |
| 3.731898561 | 3.727494425 | 16.708847995 |
| 4.971958406 | 2.485941863 | 14.999862612 |
| 4.975393255 | 2.484968130 | 18.428775061 |
| 6.213506968 | 3.726766514 | 16.707736578 |
| 0.000000000 | 4.971958406 | 14.999862612 |
| 7.454310949 | 4.973666273 | 18.414408346 |
| 1.246845416 | 6.215042803 | 16.712929241 |
| 2.485941863 | 4.971958406 | 14.999862612 |
| 2.487623281 | 4.962137505 | 18.428360063 |
| 3.724879504 | 6.213741677 | 16.710248613 |
| 4.971958406 | 4.971958406 | 14.999862612 |
| 4.976904642 | 4.981749525 | 18.417479332 |
| 6.216210127 | 6.215106815 | 16.702385696 |
| 4.523097466 | 3.757043590 | 22.387568714 |
| 2.426717511 | 2.703968277 | 21.428715680 |
| 6.790033848 | 2.482251190 | 21.591794358 |
| 4.740206379 | 6.327035664 | 21.605485404 |
| 5.373853007 | 3.323514111 | 22.083258412 |
| 4.582148232 | 4.708908229 | 22.069516789 |



|             |             |              |
|-------------|-------------|--------------|
| 2.461581867 | 1.747755845 | 21.639274027 |
| 3.334397873 | 3.130625391 | 21.786801950 |
| 6.662041181 | 2.349487654 | 20.610963286 |
| 2.475229466 | 2.718237100 | 20.086514667 |
| 4.822171989 | 6.336602297 | 20.610064556 |
| 3.910780950 | 6.809048426 | 21.782952843 |
| 0.215895859 | 2.903658903 | 21.650524366 |

**Ni(100)\_Heyrovsky**

**1.0**

|              |              |               |
|--------------|--------------|---------------|
| 7.4579000473 | 0.0000000000 | 0.0000000000  |
| 0.0000000000 | 7.4579000473 | 0.0000000000  |
| 0.0000000000 | 0.0000000000 | 43.5157012939 |

**Ni H O**

**27 10 4**

**Cartesian**

|             |             |              |
|-------------|-------------|--------------|
| 0.000000000 | 0.000000000 | 14.999862612 |
| 7.456046376 | 7.457358171 | 18.396894131 |
| 1.255046355 | 1.255386306 | 16.715533354 |
| 2.485941863 | 0.000000000 | 14.999862612 |
| 2.487501258 | 7.441382369 | 18.396354634 |
| 3.717581951 | 1.254538263 | 16.714587937 |
| 4.971958406 | 0.000000000 | 14.999862612 |
| 4.974405075 | 7.455637413 | 18.397660581 |
| 6.214978791 | 1.241939966 | 16.694336031 |
| 0.000000000 | 2.485941863 | 14.999862612 |

|             |             |              |
|-------------|-------------|--------------|
| 7.440289726 | 2.487121411 | 18.397150911 |
| 1.254324112 | 3.717446371 | 16.714823967 |
| 2.485941863 | 2.485941863 | 14.999862612 |
| 2.483550538 | 2.485561349 | 18.556224858 |
| 3.716835815 | 3.716920275 | 16.715445167 |
| 4.971958406 | 2.485941863 | 14.999862612 |
| 4.987239859 | 2.485167722 | 18.397552941 |
| 6.213726563 | 3.730710789 | 16.694546124 |
| 0.000000000 | 4.971958406 | 14.999862612 |
| 7.455409371 | 4.973992111 | 18.396492102 |
| 1.241712035 | 6.215291737 | 16.694385312 |
| 2.485941863 | 4.971958406 | 14.999862612 |
| 2.485451329 | 4.987407445 | 18.396767038 |
| 3.730944165 | 6.214164421 | 16.694578545 |
| 4.971958406 | 4.971958406 | 14.999862612 |
| 4.972471389 | 4.973206190 | 18.397730612 |
| 6.214583164 | 6.214885886 | 16.691830480 |
| 2.498656625 | 2.479277315 | 20.188091928 |
| 5.370399044 | 3.282391726 | 23.181872420 |
| 4.592867519 | 4.668973838 | 23.201914233 |
| 2.432190064 | 1.654750556 | 22.857053433 |
| 3.280366467 | 3.025791169 | 22.898363897 |
| 6.715159310 | 2.231816424 | 21.697346523 |
| 2.486736452 | 2.511990612 | 21.061280282 |
| 4.838674108 | 6.375031081 | 21.739012328 |
| 3.897981728 | 6.791486558 | 22.900195076 |

|             |             |              |
|-------------|-------------|--------------|
| 0.171830673 | 2.953340627 | 22.725724701 |
| 4.530897110 | 3.718327643 | 23.502038241 |
| 2.408688224 | 2.584053305 | 22.542324086 |
| 6.783732255 | 2.467848120 | 22.641812092 |
| 4.730148990 | 6.320581154 | 22.706982351 |

**Cu(100)\_Rf\_sur**

**1.0**

|              |              |               |
|--------------|--------------|---------------|
| 7.6687002182 | 0.0000000000 | 0.0000000000  |
| 0.0000000000 | 7.6687002182 | 0.0000000000  |
| 0.0000000000 | 0.0000000000 | 43.6150016785 |

**Cu H O**

**27 8 4**

**Cartesian**

|             |             |              |
|-------------|-------------|--------------|
| 0.000000000 | 0.000000000 | 15.000071048 |
| 7.667651196 | 0.000357286 | 18.537300411 |
| 1.277462645 | 1.277959731 | 16.770038201 |
| 2.556207885 | 0.000000000 | 15.000071048 |
| 2.557427402 | 0.006418672 | 18.541036118 |
| 3.833144991 | 1.279683418 | 16.770207179 |
| 5.112492562 | 0.000000000 | 15.000071048 |
| 5.110638604 | 7.668005898 | 18.534759247 |
| 6.392597759 | 1.276804550 | 16.768066361 |
| 0.000000000 | 2.556207885 | 15.000071048 |
| 0.004679435 | 2.557237024 | 18.542337246 |
| 1.278772665 | 3.834110137 | 16.770571131 |

|             |             |              |
|-------------|-------------|--------------|
| 2.556207885 | 2.556207885 | 15.000071048 |
| 2.559185370 | 2.560540186 | 18.541714628 |
| 3.833659446 | 3.833844339 | 16.770022603 |
| 5.112492562 | 2.556207885 | 15.000071048 |
| 5.113718477 | 2.556030763 | 18.540929532 |
| 6.392059307 | 3.829879996 | 16.766510467 |
| 0.000000000 | 5.112492562 | 15.000071048 |
| 7.666937221 | 5.110224480 | 18.536498417 |
| 1.276435221 | 6.392724373 | 16.769990107 |
| 2.556207885 | 5.112492562 | 15.000071048 |
| 2.556789990 | 5.113848748 | 18.541956396 |
| 3.829654651 | 6.392263626 | 16.766752235 |
| 5.112492562 | 5.112492562 | 15.000071048 |
| 5.109777903 | 5.109737679 | 18.533203352 |
| 6.390984231 | 6.390741516 | 16.766397382 |
| 5.576909412 | 3.397869923 | 23.312494086 |
| 4.786232124 | 4.760208153 | 23.305550403 |
| 3.207075237 | 3.178963507 | 23.016452982 |
| 7.028353939 | 2.239645758 | 21.862967114 |
| 2.517495549 | 2.639479198 | 21.722267195 |
| 5.066079170 | 6.487630916 | 21.832262569 |
| 4.087040058 | 6.946256891 | 22.943340237 |
| 0.457712281 | 2.786240790 | 22.824520329 |
| 4.723224532 | 3.809947437 | 23.596678155 |
| 2.340059094 | 2.817474903 | 22.656088572 |
| 7.156146290 | 2.603134132 | 22.757909326 |

4.910327529      6.443808769      22.792814916

Cu(100)\_Rf\_top

1.0

|              |              |               |
|--------------|--------------|---------------|
| 7.6687002182 | 0.0000000000 | 0.0000000000  |
| 0.0000000000 | 7.6687002182 | 0.0000000000  |
| 0.0000000000 | 0.0000000000 | 43.6150016785 |

Cu H O

27 9 4

Cartesian

|             |             |              |
|-------------|-------------|--------------|
| 0.000000000 | 0.000000000 | 15.000071048 |
| 7.668120628 | 0.000055399 | 18.515672567 |
| 1.282738837 | 1.282963954 | 16.756200228 |
| 2.556207885 | 0.000000000 | 15.000071048 |
| 2.557053502 | 0.014499712 | 18.545131877 |
| 3.827902853 | 1.284252034 | 16.754276482 |
| 5.112492562 | 0.000000000 | 15.000071048 |
| 5.110936170 | 7.667720674 | 18.512169530 |
| 6.392065706 | 1.282377050 | 16.771486210 |
| 0.000000000 | 2.556207885 | 15.000071048 |
| 0.010783760 | 2.556824728 | 18.542859777 |
| 1.284449040 | 3.827713617 | 16.755064178 |
| 2.556207885 | 2.556207885 | 15.000071048 |
| 2.560251990 | 2.563044126 | 18.586223350 |
| 3.828289551 | 3.828643339 | 16.753753951 |
| 5.112492562 | 2.556207885 | 15.000071048 |

|             |             |              |
|-------------|-------------|--------------|
| 5.107148263 | 2.556375637 | 18.542281353 |
| 6.392103188 | 3.822908914 | 16.771206747 |
| 0.000000000 | 5.112492562 | 15.000071048 |
| 7.668420936 | 5.110218995 | 18.512404799 |
| 1.282194100 | 6.393527023 | 16.771612293 |
| 2.556207885 | 5.112492562 | 15.000071048 |
| 2.556752508 | 5.109979023 | 18.540627972 |
| 3.822429884 | 6.393653637 | 16.771204147 |
| 5.112492562 | 5.112492562 | 15.000071048 |
| 5.109483994 | 5.109600095 | 18.509497083 |
| 6.391119530 | 6.390635471 | 16.752777780 |
| 2.575315853 | 2.537840860 | 20.112380402 |
| 5.572619621 | 3.394626869 | 23.319367578 |
| 4.782961187 | 4.756484697 | 23.313739321 |
| 3.210131570 | 3.183302207 | 23.030332549 |
| 7.029455983 | 2.245017710 | 21.860279069 |
| 2.520727633 | 2.640014679 | 21.727588693 |
| 5.060584490 | 6.487728276 | 21.835522539 |
| 4.088175927 | 6.950420525 | 22.949657403 |
| 0.450116157 | 2.785300784 | 22.833658122 |
| 4.729482553 | 3.813038966 | 23.624663460 |
| 2.344747468 | 2.811409545 | 22.671361555 |
| 7.152488197 | 2.588939654 | 22.764938797 |
| 4.910785534 | 6.451345728 | 22.799134681 |

**Cu(100)\_Rf\_min**

1.0

|              |              |               |
|--------------|--------------|---------------|
| 7.6687002182 | 0.0000000000 | 0.0000000000  |
| 0.0000000000 | 7.6687002182 | 0.0000000000  |
| 0.0000000000 | 0.0000000000 | 43.6150016785 |

Cu H O

27 9 4

Cartesian

|             |             |              |
|-------------|-------------|--------------|
| 0.000000000 | 0.000000000 | 15.000071048 |
| 7.663142002 | 0.001538587 | 18.543964631 |
| 1.280203815 | 1.281122909 | 16.770261771 |
| 2.556207885 | 0.000000000 | 15.000071048 |
| 2.560693539 | 0.002729178 | 18.529120591 |
| 3.834719438 | 1.280432017 | 16.759362711 |
| 5.112492562 | 0.000000000 | 15.000071048 |
| 5.110613007 | 0.001217345 | 18.534738450 |
| 6.385804028 | 1.283426872 | 16.770386555 |
| 0.000000000 | 2.556207885 | 15.000071048 |
| 7.665219934 | 2.554626810 | 18.544686036 |
| 1.276148854 | 3.833508378 | 16.763802924 |
| 2.556207885 | 2.556207885 | 15.000071048 |
| 2.547199324 | 2.551378271 | 18.563347671 |
| 3.836231949 | 3.833513634 | 16.726781214 |
| 5.112492562 | 2.556207885 | 15.000071048 |
| 5.118163679 | 2.548629102 | 18.572918307 |
| 6.390011543 | 3.833328284 | 16.764346253 |
| 0.000000000 | 5.112492562 | 15.000071048 |

|             |             |              |
|-------------|-------------|--------------|
| 7.668673707 | 5.103183006 | 18.548189073 |
| 1.278913564 | 6.386536287 | 16.772169919 |
| 2.556207885 | 5.112492562 | 15.000071048 |
| 2.553703488 | 5.116684992 | 18.557133192 |
| 3.836155158 | 6.389381216 | 16.760038621 |
| 5.112492562 | 5.112492562 | 15.000071048 |
| 5.118839258 | 5.116095346 | 18.567253656 |
| 6.389105133 | 6.383787804 | 16.771933351 |
| 3.846785704 | 3.811541310 | 18.965449569 |
| 6.818684858 | 4.703693070 | 22.287285677 |
| 6.029758682 | 6.067183395 | 22.279725876 |
| 4.457620871 | 4.494453653 | 22.066738604 |
| 0.611159187 | 3.619424720 | 20.824274287 |
| 3.709321326 | 3.956653721 | 20.805282495 |
| 6.291688252 | 0.128520624 | 20.803170274 |
| 5.332509707 | 0.586944722 | 21.937858024 |
| 1.695912796 | 4.094098445 | 21.837966216 |
| 5.976557959 | 5.124228808 | 22.594065963 |
| 3.580105139 | 4.108667279 | 21.755971744 |
| 0.733307046 | 3.867278427 | 21.769601744 |
| 6.157017608 | 0.089729904 | 21.781314497 |

**Cu(100)\_Volmer**

**1.0**

|              |              |              |
|--------------|--------------|--------------|
| 7.6687002182 | 0.0000000000 | 0.0000000000 |
| 0.0000000000 | 7.6687002182 | 0.0000000000 |



0.0000000000 0.0000000000 43.6150016785

Cu O H

27 4 9

Cartesian

|             |             |              |
|-------------|-------------|--------------|
| 0.000000000 | 0.000000000 | 15.000071048 |
| 7.664259130 | 0.001193965 | 18.549618884 |
| 1.283070227 | 1.275451106 | 16.770363158 |
| 2.556207885 | 0.000000000 | 15.000071048 |
| 2.559937055 | 0.000672290 | 18.553563863 |
| 3.837574423 | 1.278140624 | 16.771469312 |
| 5.112492562 | 0.000000000 | 15.000071048 |
| 5.113308467 | 7.663428140 | 18.552317328 |
| 6.392950176 | 1.278049549 | 16.772938118 |
| 0.000000000 | 2.556207885 | 15.000071048 |
| 0.019841612 | 2.557483167 | 18.543708565 |
| 1.282003150 | 3.836332509 | 16.770528236 |
| 2.556207885 | 2.556207885 | 15.000071048 |
| 2.567688619 | 2.557572756 | 18.602766266 |
| 3.838893128 | 3.832210927 | 16.770935082 |
| 5.112492562 | 2.556207885 | 15.000071048 |
| 5.117106887 | 2.556556416 | 18.563247585 |
| 6.391657068 | 3.831230469 | 16.772253108 |
| 0.000000000 | 5.112492562 | 15.000071048 |
| 7.661033445 | 5.113461593 | 18.546947737 |
| 1.279348028 | 6.388616961 | 16.779307277 |
| 2.556207885 | 5.112492562 | 15.000071048 |

|             |             |              |
|-------------|-------------|--------------|
| 2.558919115 | 5.091607198 | 18.569810418 |
| 3.827502213 | 6.386467723 | 16.775137428 |
| 5.112492562 | 5.112492562 | 15.000071048 |
| 5.114360689 | 5.116925422 | 18.551321660 |
| 6.391721974 | 6.393076332 | 16.770459345 |
| 4.615137795 | 3.861403447 | 22.563221037 |
| 2.468759683 | 2.758105063 | 21.652501509 |
| 6.868063850 | 2.569476755 | 21.716781920 |
| 4.814936928 | 6.442722722 | 21.724543195 |
| 5.449665112 | 3.418926924 | 22.234793410 |
| 4.668153396 | 4.802428199 | 22.224511768 |
| 2.529844296 | 1.801837953 | 21.853896912 |
| 3.363139071 | 3.184607885 | 21.979023587 |
| 6.750138704 | 2.448707595 | 20.735879461 |
| 2.529447085 | 2.772673897 | 20.231161315 |
| 4.879606500 | 6.450794020 | 20.731409351 |
| 3.982119128 | 6.915896049 | 21.914445516 |
| 0.051509604 | 3.046096999 | 21.790592672 |

**Cu(100)\_Heyrovsky**

**1.0**

|              |              |               |
|--------------|--------------|---------------|
| 7.6687002182 | 0.0000000000 | 0.0000000000  |
| 0.0000000000 | 7.6687002182 | 0.0000000000  |
| 0.0000000000 | 0.0000000000 | 43.6150016785 |

**Cu H O**

**27 10 4**

## Cartesian

|             |             |              |
|-------------|-------------|--------------|
| 0.000000000 | 0.000000000 | 15.000071048 |
| 7.661016076 | 7.663896658 | 18.548129281 |
| 1.285171356 | 1.285296370 | 16.785910405 |
| 2.556207885 | 0.000000000 | 15.000071048 |
| 2.558903574 | 7.647827196 | 18.541901804 |
| 3.824421882 | 1.284938697 | 16.784348011 |
| 5.112492562 | 0.000000000 | 15.000071048 |
| 5.117884854 | 7.660827297 | 18.553927815 |
| 6.389976347 | 1.274381058 | 16.772513074 |
| 0.000000000 | 2.556207885 | 15.000071048 |
| 7.647112307 | 2.557714911 | 18.548283961 |
| 1.284844765 | 3.820622778 | 16.783688998 |
| 2.556207885 | 2.556207885 | 15.000071048 |
| 2.556065730 | 2.558068699 | 18.666001615 |
| 3.824387601 | 3.822337094 | 16.781709360 |
| 5.112492562 | 2.556207885 | 15.000071048 |
| 5.127664298 | 2.557372322 | 18.547813423 |
| 6.388294255 | 3.840023055 | 16.772253108 |
| 0.000000000 | 5.112492562 | 15.000071048 |
| 7.661396375 | 5.115529926 | 18.544839416 |
| 1.273589720 | 6.391440864 | 16.772145223 |
| 2.556207885 | 5.112492562 | 15.000071048 |
| 2.557640863 | 5.124572540 | 18.539719392 |
| 3.841711089 | 6.390331506 | 16.772225812 |
| 5.112492562 | 5.112492562 | 15.000071048 |

|             |             |              |
|-------------|-------------|--------------|
| 5.115695392 | 5.117481243 | 18.553177814 |
| 6.392283738 | 6.392618328 | 16.769568963 |
| 2.607619100 | 2.528993195 | 20.287849429 |
| 5.437142671 | 3.342783475 | 23.150527675 |
| 4.643627310 | 4.739226344 | 23.163775526 |
| 2.516743179 | 1.777185367 | 22.851819324 |
| 3.463585089 | 3.157491469 | 22.896320247 |
| 6.819467853 | 2.329308334 | 21.719476464 |
| 2.595261439 | 2.617668227 | 21.312160955 |
| 4.926139192 | 6.442411444 | 21.749174942 |
| 4.004522944 | 6.869156295 | 22.926770025 |
| 7.646453640 | 3.121509103 | 22.770190104 |
| 4.585061263 | 3.778541001 | 23.452077452 |
| 2.553408894 | 2.697296760 | 22.505422870 |
| 6.860797488 | 2.550144127 | 22.670859822 |
| 4.806579035 | 6.355332570 | 22.715581715 |

**Au(100)\_Rf\_sur**

**1.0**

|              |              |               |
|--------------|--------------|---------------|
| 8.6400995255 | 0.0000000000 | 0.0000000000  |
| 0.0000000000 | 8.6400995255 | 0.0000000000  |
| 0.0000000000 | 0.0000000000 | 44.0730018616 |

**Au H O**

**27 8 4**

**Cartesian**

|             |             |              |
|-------------|-------------|--------------|
| 0.000000000 | 0.000000000 | 14.999804945 |
|-------------|-------------|--------------|

|             |             |              |
|-------------|-------------|--------------|
| 8.638605539 | 8.639797226 | 19.220943032 |
| 1.442535576 | 1.446551597 | 17.123010302 |
| 2.880004422 | 0.000000000 | 14.999804945 |
| 2.879034695 | 0.009928477 | 19.222349767 |
| 4.313927303 | 1.447111906 | 17.121821605 |
| 5.760095361 | 0.000000000 | 14.999804945 |
| 5.761817488 | 8.640037212 | 19.215553832 |
| 7.199889645 | 1.441275781 | 17.107131669 |
| 0.000000000 | 2.880004422 | 14.999804945 |
| 8.632331930 | 2.880800339 | 19.228201310 |
| 1.443476977 | 4.316679925 | 17.123757671 |
| 2.880004422 | 2.880004422 | 14.999804945 |
| 2.872382311 | 2.890468762 | 19.271011493 |
| 4.314821326 | 4.318136317 | 17.122558466 |
| 5.760095361 | 2.880004422 | 14.999804945 |
| 5.753949470 | 2.881385367 | 19.222067369 |
| 7.200752768 | 4.319950627 | 17.107381229 |
| 0.000000000 | 5.760095361 | 14.999804945 |
| 8.638819260 | 5.763044709 | 19.219222376 |
| 1.440550804 | 7.201399081 | 17.107499442 |
| 2.880004422 | 5.760095361 | 14.999804945 |
| 2.879815420 | 5.770194832 | 19.225020067 |
| 4.319081581 | 7.202538239 | 17.107140863 |
| 5.760095361 | 5.760095361 | 14.999804945 |
| 5.761045518 | 5.762097128 | 19.216022744 |
| 7.200860401 | 7.200881516 | 17.106221429 |

|             |             |              |
|-------------|-------------|--------------|
| 5.861041654 | 3.699059810 | 23.964473573 |
| 5.110274720 | 5.094112787 | 23.992374468 |
| 3.642554328 | 3.387374949 | 23.748642899 |
| 7.220605635 | 2.607281649 | 22.467416223 |
| 2.803473036 | 2.911504304 | 22.515964990 |
| 5.323146893 | 6.839680875 | 22.524379129 |
| 4.344513336 | 7.226640289 | 23.661186292 |
| 8.049590805 | 3.443096101 | 23.477985034 |
| 5.057871906 | 4.159348916 | 24.327899748 |
| 2.793386955 | 2.919818303 | 23.477987661 |
| 7.291173179 | 2.832930725 | 23.413742835 |
| 5.197587680 | 6.785372083 | 23.490229274 |

**Au(100)\_Rf\_top**

**1.0**

|              |              |               |
|--------------|--------------|---------------|
| 8.6400995255 | 0.0000000000 | 0.0000000000  |
| 0.0000000000 | 8.6400995255 | 0.0000000000  |
| 0.0000000000 | 0.0000000000 | 44.0730018616 |

**Au H O**

**27 9 4**

**Cartesian**

|             |             |              |
|-------------|-------------|--------------|
| 0.000000000 | 0.000000000 | 14.999804945 |
| 8.632285066 | 8.633652365 | 19.227268741 |
| 1.450755718 | 1.453191235 | 17.126924466 |
| 2.880004422 | 0.000000000 | 14.999804945 |
| 2.879535008 | 8.621730345 | 19.219239451 |

|             |             |              |
|-------------|-------------|--------------|
| 4.307931532 | 1.452778213 | 17.124071592 |
| 5.760095361 | 0.000000000 | 14.999804945 |
| 5.768555618 | 8.632924684 | 19.221599771 |
| 7.199854626 | 1.435626984 | 17.106405315 |
| 0.000000000 | 2.880004422 | 14.999804945 |
| 8.604064126 | 2.881284172 | 19.224886092 |
| 1.454940013 | 4.305564380 | 17.130474796 |
| 2.880004422 | 2.880004422 | 14.999804945 |
| 2.866649184 | 2.897812263 | 19.316734969 |
| 4.306570670 | 4.308968979 | 17.127251522 |
| 5.760095361 | 2.880004422 | 14.999804945 |
| 5.781445304 | 2.881636425 | 19.217014420 |
| 7.200852161 | 4.327080922 | 17.105387370 |
| 0.000000000 | 5.760095361 | 14.999804945 |
| 8.633621980 | 5.768391851 | 19.225613759 |
| 1.434065405 | 7.201596837 | 17.106196472 |
| 2.880004422 | 5.760095361 | 14.999804945 |
| 2.879811300 | 5.799378288 | 19.222780587 |
| 4.324943198 | 7.202894097 | 17.105929836 |
| 5.760095361 | 5.760095361 | 14.999804945 |
| 5.766337041 | 5.768484035 | 19.221699595 |
| 7.201866692 | 7.199520397 | 17.095675515 |
| 2.931264472 | 2.801741124 | 20.924699758 |
| 5.860468470 | 3.698200034 | 23.962779186 |
| 5.111373709 | 5.094545893 | 23.990238753 |
| 3.644725526 | 3.387510906 | 23.753526409 |

|             |             |              |
|-------------|-------------|--------------|
| 7.220314151 | 2.610419741 | 22.470358413 |
| 2.805592220 | 2.912130532 | 22.519574427 |
| 5.321885167 | 6.836973573 | 22.526112919 |
| 4.344968072 | 7.223119817 | 23.665100456 |
| 8.043781202 | 3.446430920 | 23.485109338 |
| 5.059681066 | 4.160980920 | 24.329100267 |
| 2.794465602 | 2.920622203 | 23.492801064 |
| 7.288081178 | 2.832208451 | 23.417557174 |
| 5.200096712 | 6.784640282 | 23.492023485 |

**Au(100)\_Rf\_min**

**1.0**

|              |              |               |
|--------------|--------------|---------------|
| 8.6400995255 | 0.0000000000 | 0.0000000000  |
| 0.0000000000 | 8.6400995255 | 0.0000000000  |
| 0.0000000000 | 0.0000000000 | 44.0730018616 |

**Au H O**

**27 9 4**

**Cartesian**

|             |             |              |
|-------------|-------------|--------------|
| 0.000000000 | 0.000000000 | 14.999804945 |
| 8.632915414 | 0.000587122 | 19.244481868 |
| 1.436708721 | 1.447808301 | 17.121900413 |
| 2.880004422 | 0.000000000 | 14.999804945 |
| 2.882979262 | 8.634553082 | 19.208856409 |
| 4.329101743 | 1.445016927 | 17.122608378 |
| 5.760095361 | 0.000000000 | 14.999804945 |
| 5.760006783 | 8.639594835 | 19.277199286 |



|             |             |              |
|-------------|-------------|--------------|
| 7.197223541 | 1.425380870 | 17.105879924 |
| 0.000000000 | 2.880004422 | 14.999804945 |
| 8.621038198 | 2.869816373 | 19.229975819 |
| 1.438491230 | 4.317559786 | 17.117844394 |
| 2.880004422 | 2.880004422 | 14.999804945 |
| 2.881019982 | 2.793294772 | 19.274208498 |
| 4.323190687 | 4.319135913 | 17.123736655 |
| 5.760095361 | 2.880004422 | 14.999804945 |
| 5.780249498 | 2.866372635 | 19.229831336 |
| 7.199279382 | 4.319605326 | 17.119633350 |
| 0.000000000 | 5.760095361 | 14.999804945 |
| 8.622275204 | 5.769687566 | 19.220047240 |
| 1.438298109 | 7.190918003 | 17.119156558 |
| 2.880004422 | 5.760095361 | 14.999804945 |
| 2.879419908 | 5.836116135 | 19.276164266 |
| 4.327577887 | 7.193017618 | 17.122544017 |
| 5.760095361 | 5.760095361 | 14.999804945 |
| 5.778170483 | 5.774289003 | 19.229315139 |
| 7.196091593 | 7.215910471 | 17.104756901 |
| 2.905420984 | 4.314188403 | 20.160279315 |
| 5.839583048 | 5.226951384 | 23.275522938 |
| 5.092134195 | 6.624043206 | 23.302701421 |
| 3.617275783 | 4.916637941 | 23.116166556 |
| 7.199517307 | 4.167046215 | 21.727002214 |
| 2.740023685 | 4.429637073 | 21.913095750 |
| 5.275990282 | 8.357248958 | 21.791504482 |

|             |             |              |
|-------------|-------------|--------------|
| 4.329655872 | 0.122544050 | 22.955612282 |
| 8.027966372 | 4.950144225 | 22.779777008 |
| 5.053877643 | 5.697035858 | 23.664107467 |
| 2.760296011 | 4.454406035 | 22.881918296 |
| 7.272245234 | 4.335802794 | 22.690794140 |
| 5.183445538 | 8.320388029 | 22.772755155 |

**Au(100)\_Volmer**

1.0

|              |              |               |
|--------------|--------------|---------------|
| 8.6400995255 | 0.0000000000 | 0.0000000000  |
| 0.0000000000 | 8.6400995255 | 0.0000000000  |
| 0.0000000000 | 0.0000000000 | 44.0730018616 |

**Au O H**

27 4 9

**Cartesian**

|             |             |              |
|-------------|-------------|--------------|
| 0.000000000 | 0.000000000 | 14.999804945 |
| 8.635850342 | 8.634237394 | 19.221212295 |
| 1.450553713 | 1.450744903 | 17.115635124 |
| 2.880004422 | 0.000000000 | 14.999804945 |
| 2.878355681 | 8.632937044 | 19.210556049 |
| 4.310417131 | 1.450334714 | 17.119328624 |
| 5.760095361 | 0.000000000 | 14.999804945 |
| 5.763646218 | 8.629356318 | 19.233941208 |
| 7.197286885 | 1.432553523 | 17.107888232 |
| 0.000000000 | 2.880004422 | 14.999804945 |
| 8.629096763 | 2.877804641 | 19.207708429 |

|             |             |              |
|-------------|-------------|--------------|
| 1.450711043 | 4.310115089 | 17.115942478 |
| 2.880004422 | 2.880004422 | 14.999804945 |
| 2.878056987 | 2.883435543 | 19.342849534 |
| 4.312641116 | 4.310695741 | 17.115163585 |
| 5.760095361 | 2.880004422 | 14.999804945 |
| 5.767482894 | 2.875958917 | 19.214671175 |
| 7.200670885 | 4.323069149 | 17.105438596 |
| 0.000000000 | 5.760095361 | 14.999804945 |
| 8.637413337 | 5.764967682 | 19.218532800 |
| 1.437169765 | 7.199784072 | 17.106197786 |
| 2.880004422 | 5.760095361 | 14.999804945 |
| 2.882537915 | 5.769816829 | 19.209647123 |
| 4.324344780 | 7.202408976 | 17.107506010 |
| 5.760095361 | 5.760095361 | 14.999804945 |
| 5.768277009 | 5.763329499 | 19.220887866 |
| 7.201085967 | 7.201486114 | 17.098607198 |
| 5.120778457 | 4.086771624 | 23.348512900 |
| 2.891302789 | 2.888155427 | 22.593822700 |
| 7.300959535 | 2.727703835 | 22.419453267 |
| 5.228000933 | 6.684472140 | 22.465958263 |
| 5.913881694 | 3.621720405 | 22.959079864 |
| 5.147822645 | 5.014555577 | 22.983765366 |
| 3.042282168 | 1.932061311 | 22.722543526 |
| 3.772346758 | 3.343214551 | 22.840622554 |
| 7.245648572 | 2.670989010 | 21.431426362 |
| 2.889418440 | 2.934867085 | 20.975160948 |

|             |             |              |
|-------------|-------------|--------------|
| 5.343302059 | 6.657547945 | 21.481226873 |
| 4.362448895 | 7.117404717 | 22.596302546 |
| 8.074494179 | 3.301504991 | 22.582471625 |

**Au(100)\_Heyrovsky**

**1.0**

|              |              |               |
|--------------|--------------|---------------|
| 8.6400995255 | 0.0000000000 | 0.0000000000  |
| 0.0000000000 | 8.6400995255 | 0.0000000000  |
| 0.0000000000 | 0.0000000000 | 44.0730018616 |

**Au H O**

**27 10 4**

**Cartesian**

|             |             |              |
|-------------|-------------|--------------|
| 0.000000000 | 0.000000000 | 14.999804945 |
| 8.631027461 | 8.632370555 | 19.226991597 |
| 1.454802381 | 1.457395099 | 17.145490475 |
| 2.880004422 | 0.000000000 | 14.999804945 |
| 2.879084649 | 8.610426313 | 19.204996098 |
| 4.305135651 | 1.457236739 | 17.144456768 |
| 5.760095361 | 0.000000000 | 14.999804945 |
| 5.767854202 | 8.631757716 | 19.229001218 |
| 7.199999853 | 1.432147582 | 17.099455704 |
| 0.000000000 | 2.880004422 | 14.999804945 |
| 8.606157045 | 2.879527026 | 19.216616436 |
| 1.455821933 | 4.302925313 | 17.144811407 |
| 2.880004422 | 2.880004422 | 14.999804945 |
| 2.877187168 | 2.881735818 | 19.366054747 |

|             |             |              |
|-------------|-------------|--------------|
| 4.307448471 | 4.306480547 | 17.143227352 |
| 5.760095361 | 2.880004422 | 14.999804945 |
| 5.791105488 | 2.881401332 | 19.210986870 |
| 7.200364981 | 4.328990505 | 17.099573917 |
| 0.000000000 | 5.760095361 | 14.999804945 |
| 8.631119129 | 5.768362497 | 19.221957037 |
| 1.430986151 | 7.200875851 | 17.096936454 |
| 2.880004422 | 5.760095361 | 14.999804945 |
| 2.880383454 | 5.792710197 | 19.204524559 |
| 4.329785650 | 7.201304323 | 17.098106763 |
| 5.760095361 | 5.760095361 | 14.999804945 |
| 5.766957604 | 5.770269505 | 19.232590953 |
| 7.199542542 | 7.200980394 | 17.103149204 |
| 2.911095144 | 2.891640880 | 21.124055479 |
| 5.841314959 | 3.685671871 | 23.964696864 |
| 5.047947018 | 5.081509950 | 23.979586448 |
| 2.955791389 | 2.072242894 | 23.702093245 |
| 3.859622382 | 3.476866832 | 23.738797069 |
| 7.187892436 | 2.672532177 | 22.515287235 |
| 2.949983846 | 2.945266795 | 22.167189346 |
| 5.324471447 | 6.786975247 | 22.559638127 |
| 4.388622750 | 7.216736515 | 23.721204347 |
| 8.024989214 | 3.465695410 | 23.554497744 |
| 4.995778524 | 4.125529004 | 24.281313317 |
| 2.954604852 | 2.999810937 | 23.374735171 |
| 7.248108165 | 2.881065816 | 23.467574409 |

5.201136477      6.712549398      23.525672160

Ag(100)\_Rf\_sur

1.0

|              |              |               |
|--------------|--------------|---------------|
| 8.6679000854 | 0.0000000000 | 0.0000000000  |
| 0.0000000000 | 8.6679000854 | 0.0000000000  |
| 0.0000000000 | 0.0000000000 | 44.0861015320 |

Ag H O

27 8 4

Cartesian

|             |             |              |
|-------------|-------------|--------------|
| 0.000000000 | 0.000000000 | 14.999855259 |
| 0.001128853 | 0.001494028 | 19.108541884 |
| 1.446544731 | 1.447455968 | 17.054424557 |
| 2.889271182 | 0.000000000 | 14.999855259 |
| 2.890512685 | 0.006819627 | 19.128956768 |
| 4.328985322 | 1.447602696 | 17.053586309 |
| 5.778629161 | 0.000000000 | 14.999855259 |
| 5.779233122 | 0.000656799 | 19.103735754 |
| 7.222052828 | 1.447919400 | 17.052864995 |
| 0.000000000 | 2.889271182 | 14.999855259 |
| 8.663718860 | 2.890494344 | 19.120210347 |
| 1.446663302 | 4.333219762 | 17.053712440 |
| 2.889271182 | 2.889271182 | 14.999855259 |
| 2.882064214 | 2.893779703 | 19.134326548 |
| 4.328668359 | 4.332021916 | 17.051984704 |
| 5.778629161 | 2.889271182 | 14.999855259 |

|             |             |              |
|-------------|-------------|--------------|
| 5.768047712 | 2.889685792 | 19.120459982 |
| 7.222665571 | 4.330144678 | 17.051537988 |
| 0.000000000 | 5.778629161 | 14.999855259 |
| 0.001606418 | 5.777798910 | 19.108290935 |
| 1.449516486 | 7.224651563 | 17.056411126 |
| 2.889271182 | 5.778629161 | 14.999855259 |
| 2.890875372 | 5.779843282 | 19.127872827 |
| 4.329443072 | 7.224592665 | 17.054286601 |
| 5.778629161 | 5.778629161 | 14.999855259 |
| 5.779650056 | 5.775789669 | 19.098838967 |
| 7.225253973 | 7.223465341 | 17.044265728 |
| 5.855559982 | 3.700598556 | 23.891426842 |
| 5.109161459 | 5.100370708 | 23.918019535 |
| 3.641204288 | 3.384998472 | 23.617863714 |
| 7.240385534 | 2.568402073 | 22.439260864 |
| 2.854655310 | 2.905388764 | 22.354442787 |
| 5.335756163 | 6.868339686 | 22.479914574 |
| 4.330682766 | 7.221390486 | 23.604814375 |
| 8.040445609 | 3.466453571 | 23.420405089 |
| 5.040340964 | 4.158649613 | 24.231645132 |
| 2.803258481 | 2.916128824 | 23.314717530 |
| 7.293429692 | 2.840372342 | 23.373565687 |
| 5.192870173 | 6.793535902 | 23.440047418 |

Ag(100)\_Rf\_top

1.0

|                     |                     |                      |
|---------------------|---------------------|----------------------|
| <b>8.6679000854</b> | <b>0.0000000000</b> | <b>0.0000000000</b>  |
| <b>0.0000000000</b> | <b>8.6679000854</b> | <b>0.0000000000</b>  |
| <b>0.0000000000</b> | <b>0.0000000000</b> | <b>44.0861015320</b> |

**Ag H O**

**27 9 4**

**Cartesian**

|                    |                    |                     |
|--------------------|--------------------|---------------------|
| <b>0.000000000</b> | <b>0.000000000</b> | <b>14.999855259</b> |
| <b>8.667545149</b> | <b>0.000436730</b> | <b>19.090928167</b> |
| <b>1.450545001</b> | <b>1.451048473</b> | <b>17.041681349</b> |
| <b>2.889271182</b> | <b>0.000000000</b> | <b>14.999855259</b> |
| <b>2.890397215</b> | <b>0.003033062</b> | <b>19.124148010</b> |
| <b>4.326786472</b> | <b>1.449575512</b> | <b>17.039421496</b> |
| <b>5.778629161</b> | <b>0.000000000</b> | <b>14.999855259</b> |
| <b>5.780964406</b> | <b>8.666601751</b> | <b>19.085346854</b> |
| <b>7.221128546</b> | <b>1.450627923</b> | <b>17.055203681</b> |
| <b>0.000000000</b> | <b>2.889271182</b> | <b>14.999855259</b> |
| <b>8.658914559</b> | <b>2.890264436</b> | <b>19.112437503</b> |
| <b>1.451609035</b> | <b>4.328196919</b> | <b>17.041756240</b> |
| <b>2.889271182</b> | <b>2.889271182</b> | <b>14.999855259</b> |
| <b>2.878165594</b> | <b>2.895545086</b> | <b>19.136176474</b> |
| <b>4.325619883</b> | <b>4.328660093</b> | <b>17.038599014</b> |
| <b>5.778629161</b> | <b>2.889271182</b> | <b>14.999855259</b> |
| <b>5.771281923</b> | <b>2.889434185</b> | <b>19.113769765</b> |
| <b>7.221785204</b> | <b>4.327832941</b> | <b>17.053645433</b> |
| <b>0.000000000</b> | <b>5.778629161</b> | <b>14.999855259</b> |
| <b>0.000735371</b> | <b>5.778853386</b> | <b>19.090082036</b> |



|             |             |              |
|-------------|-------------|--------------|
| 1.451709265 | 7.225526246 | 17.058694629 |
| 2.889271182 | 5.778629161 | 14.999855259 |
| 2.890730969 | 5.784854759 | 19.120666260 |
| 4.326167529 | 7.225399151 | 17.056782950 |
| 5.778629161 | 5.778629161 | 14.999855259 |
| 5.780705049 | 5.777694547 | 19.080342330 |
| 7.226224236 | 7.223063389 | 17.034612738 |
| 2.976962212 | 2.839809972 | 20.809618881 |
| 5.857540290 | 3.700888137 | 23.892937791 |
| 5.116554679 | 5.104459970 | 23.920739242 |
| 3.639726936 | 3.380232660 | 23.623949552 |
| 7.240106027 | 2.574324398 | 22.434657069 |
| 2.858956913 | 2.907757591 | 22.349300307 |
| 5.333084580 | 6.863718278 | 22.476708735 |
| 4.332867150 | 7.216911156 | 23.606372623 |
| 8.030966168 | 3.469629917 | 23.425613262 |
| 5.042273224 | 4.161383968 | 24.228497104 |
| 2.800848839 | 2.915529513 | 23.327511978 |
| 7.291953631 | 2.835647604 | 23.372469921 |
| 5.195206451 | 6.794329472 | 23.439603331 |

**Ag(100)\_Rf\_min**

**1.0**

|              |              |               |
|--------------|--------------|---------------|
| 8.6679000854 | 0.0000000000 | 0.0000000000  |
| 0.0000000000 | 8.6679000854 | 0.0000000000  |
| 0.0000000000 | 0.0000000000 | 44.0861015320 |

Ag H O

27 9 4

Cartesian

|             |             |              |
|-------------|-------------|--------------|
| 0.000000000 | 0.000000000 | 14.999855259 |
| 8.655335744 | 8.664697907 | 19.116941443 |
| 1.450632314 | 1.446530136 | 17.057743388 |
| 2.889271182 | 0.000000000 | 14.999855259 |
| 2.892349882 | 0.000826166 | 19.108231811 |
| 4.330488765 | 1.458483413 | 17.045247187 |
| 5.778629161 | 0.000000000 | 14.999855259 |
| 5.762753113 | 0.007039390 | 19.084872548 |
| 7.215033660 | 1.453536646 | 17.052788791 |
| 0.000000000 | 2.889271182 | 14.999855259 |
| 8.667650545 | 2.887123739 | 19.095842034 |
| 1.455288080 | 4.334544187 | 17.045795070 |
| 2.889271182 | 2.889271182 | 14.999855259 |
| 2.884238781 | 2.886385708 | 19.139875013 |
| 4.336530178 | 4.335477252 | 17.009933038 |
| 5.778629161 | 2.889271182 | 14.999855259 |
| 5.785473186 | 2.889819603 | 19.153306688 |
| 7.211705936 | 4.335023119 | 17.047826311 |
| 0.000000000 | 5.778629161 | 14.999855259 |
| 8.667134931 | 5.765888644 | 19.110182905 |
| 1.448967806 | 7.216701397 | 17.064042072 |
| 2.889271182 | 5.778629161 | 14.999855259 |
| 2.887986798 | 5.782345404 | 19.142121728 |

|             |             |              |
|-------------|-------------|--------------|
| 4.330508398 | 7.212635901 | 17.045060618 |
| 5.778629161 | 5.778629161 | 14.999855259 |
| 5.786298788 | 5.790500162 | 19.151469900 |
| 7.217762073 | 7.213382973 | 17.057464848 |
| 4.354330221 | 4.331371199 | 19.558000432 |
| 7.275831658 | 5.224249768 | 22.768826310 |
| 6.521483486 | 6.618885415 | 22.793009368 |
| 5.053006568 | 4.907539926 | 22.566685058 |
| 8.648848723 | 4.124215342 | 21.318219893 |
| 4.221949992 | 4.385546556 | 21.351946890 |
| 6.769718987 | 8.378256868 | 21.366897396 |
| 5.752613396 | 0.088812170 | 22.482421434 |
| 0.818849755 | 4.959963074 | 22.324286884 |
| 6.465074921 | 5.681484523 | 23.117942116 |
| 4.200160400 | 4.436443529 | 22.319394039 |
| 0.054779047 | 4.348770065 | 22.273850111 |
| 6.620298961 | 8.326337968 | 22.337756661 |

**Ag(100)\_Volmer**

**1.0**

|              |              |               |
|--------------|--------------|---------------|
| 8.6679000854 | 0.0000000000 | 0.0000000000  |
| 0.0000000000 | 8.6679000854 | 0.0000000000  |
| 0.0000000000 | 0.0000000000 | 44.0861015320 |

**Ag O H**

**27 4 9**

**Cartesian**

|             |             |              |
|-------------|-------------|--------------|
| 0.000000000 | 0.000000000 | 14.999855259 |
| 8.664359503 | 8.664446816 | 19.139336327 |
| 1.450109984 | 1.445335390 | 17.059027037 |
| 2.889271182 | 0.000000000 | 14.999855259 |
| 2.890935044 | 8.667367422 | 19.140964210 |
| 4.328405386 | 1.443026235 | 17.061281635 |
| 5.778629161 | 0.000000000 | 14.999855259 |
| 5.782616644 | 8.652658479 | 19.156969752 |
| 7.223127454 | 1.438136558 | 17.072890975 |
| 0.000000000 | 2.889271182 | 14.999855259 |
| 0.009599169 | 2.888120351 | 19.127516769 |
| 1.450670804 | 4.331219304 | 17.059295066 |
| 2.889271182 | 2.889271182 | 14.999855259 |
| 2.889450459 | 2.883713351 | 19.204452949 |
| 4.329057911 | 4.326747982 | 17.052443244 |
| 5.778629161 | 2.889271182 | 14.999855259 |
| 5.772383931 | 2.882410109 | 19.117996480 |
| 7.228640595 | 4.331666979 | 17.063608496 |
| 0.000000000 | 5.778629161 | 14.999855259 |
| 8.667054851 | 5.784418192 | 19.133117789 |
| 1.448871322 | 7.220911554 | 17.077731265 |
| 2.889271182 | 5.778629161 | 14.999855259 |
| 2.899171433 | 5.761923894 | 19.144368442 |
| 4.333514768 | 7.222023379 | 17.074824989 |
| 5.778629161 | 5.778629161 | 14.999855259 |
| 5.790964628 | 5.773512805 | 19.118997647 |

|             |             |              |
|-------------|-------------|--------------|
| 7.225067980 | 7.225817635 | 17.057091709 |
| 4.957290459 | 4.165731553 | 23.236862955 |
| 2.754990208 | 2.973686670 | 22.459573266 |
| 7.186127771 | 2.832900075 | 22.337118121 |
| 5.102601074 | 6.784431030 | 22.375822051 |
| 5.759194447 | 3.698993075 | 22.869305695 |
| 5.002981695 | 5.096486555 | 22.881451093 |
| 2.882945614 | 2.016495869 | 22.617405627 |
| 3.639444588 | 3.426525274 | 22.723229828 |
| 7.130577874 | 2.721055276 | 21.355041050 |
| 2.788761879 | 2.994057032 | 20.926470378 |
| 5.184014841 | 6.819795008 | 21.390418265 |
| 4.255251772 | 7.232285024 | 22.565321263 |
| 7.948977372 | 3.429695938 | 22.467632534 |

### Ag(100)\_Heyrovsky

1.0

|              |              |               |
|--------------|--------------|---------------|
| 8.6679000854 | 0.0000000000 | 0.0000000000  |
| 0.0000000000 | 8.6679000854 | 0.0000000000  |
| 0.0000000000 | 0.0000000000 | 44.0861015320 |

Ag H O

27 10 4

### Cartesian

|             |             |              |
|-------------|-------------|--------------|
| 0.000000000 | 0.000000000 | 14.999855259 |
| 8.656708992 | 8.657460197 | 19.136709904 |
| 1.455047064 | 1.455651541 | 17.083495205 |

|             |             |              |
|-------------|-------------|--------------|
| 2.889271182 | 0.000000000 | 14.999855259 |
| 2.889909758 | 8.647495625 | 19.122688303 |
| 4.323669024 | 1.454442587 | 17.082090680 |
| 5.778629161 | 0.000000000 | 14.999855259 |
| 5.789986615 | 8.655800727 | 19.138170926 |
| 7.222112242 | 1.438628535 | 17.059618278 |
| 0.000000000 | 2.889271182 | 14.999855259 |
| 8.645083399 | 2.889751406 | 19.123470054 |
| 1.455147939 | 4.323361102 | 17.083760606 |
| 2.889271182 | 2.889271182 | 14.999855259 |
| 2.886407924 | 2.889908208 | 19.231224328 |
| 4.323270689 | 4.324099649 | 17.081530972 |
| 5.778629161 | 2.889271182 | 14.999855259 |
| 5.797109112 | 2.889807979 | 19.121907865 |
| 7.222558625 | 4.339741657 | 17.058864118 |
| 0.000000000 | 5.778629161 | 14.999855259 |
| 8.656640795 | 5.789216294 | 19.137809612 |
| 1.438932970 | 7.222729119 | 17.060572146 |
| 2.889271182 | 5.778629161 | 14.999855259 |
| 2.890370091 | 5.798993840 | 19.125552536 |
| 4.339650727 | 7.222965743 | 17.059819300 |
| 5.778629161 | 5.778629161 | 14.999855259 |
| 5.790189140 | 5.789075249 | 19.136298664 |
| 7.224088934 | 7.223263848 | 17.050836383 |
| 2.935124905 | 2.889461567 | 21.004745391 |
| 5.831710002 | 3.675075672 | 23.838535763 |

|             |             |              |
|-------------|-------------|--------------|
| 5.022100222 | 5.078828590 | 23.855815758 |
| 2.942911551 | 2.088949942 | 23.586932629 |
| 3.922324378 | 3.508706779 | 23.634865169 |
| 7.188312155 | 2.652481998 | 22.433393128 |
| 2.970297206 | 2.952922364 | 22.119536290 |
| 5.334615923 | 6.786391706 | 22.477565377 |
| 4.386481170 | 7.210399336 | 23.634026921 |
| 8.013935929 | 3.468388673 | 23.468214125 |
| 4.975034704 | 4.113050081 | 24.144036400 |
| 2.974761812 | 3.011256214 | 23.246259740 |
| 7.224330208 | 2.901665546 | 23.376085686 |
| 5.181701812 | 6.680236225 | 23.435454135 |

### *Single-Atom Alloy(111)*

Pt@Au\_Rf\_sur

1.0

|               |              |               |
|---------------|--------------|---------------|
| 8.6400995255  | 0.0000000000 | 0.0000000000  |
| -4.3200497627 | 7.4825456803 | 0.0000000000  |
| 0.0000000000  | 0.0000000000 | 40.0000000000 |

Au Pt H O

26 1 8 4

Cartesian

|              |             |              |
|--------------|-------------|--------------|
| 0.010459287  | 0.351534715 | 22.982575893 |
| 1.439816364  | 1.148814094 | 20.449080467 |
| -0.000043130 | 1.995370371 | 17.999999523 |
| 2.869797544  | 0.351626116 | 22.983047962 |

|              |             |              |
|--------------|-------------|--------------|
| 4.323386705  | 1.161724965 | 20.481851101 |
| 2.880047681  | 1.995370371 | 17.999999523 |
| 5.759869393  | 0.332454792 | 22.970092297 |
| 7.196717564  | 1.161768784 | 20.481710434 |
| 5.760052102  | 1.995370371 | 17.999999523 |
| -1.418367768 | 2.826120270 | 22.983219624 |
| -0.012963974 | 3.665583340 | 20.449581146 |
| -1.440045470 | 4.489527587 | 17.999999523 |
| 2.892821494  | 3.665230336 | 20.449187756 |
| 1.440045341  | 4.489527587 | 17.999999523 |
| 4.298425201  | 2.826464355 | 22.982723713 |
| 5.760255395  | 3.655837469 | 20.499773026 |
| 4.320049763  | 4.489527587 | 17.999999523 |
| -2.879541156 | 5.320740874 | 22.987513542 |
| -1.438319609 | 6.152981732 | 20.499942303 |
| -2.880047552 | 6.983684356 | 17.999999523 |
| 0.011632596  | 5.302316396 | 22.984058857 |
| 1.439989465  | 6.155851261 | 20.481820107 |
| 0.000043259  | 6.983684356 | 17.999999523 |
| 2.869072985  | 5.303249862 | 22.982847691 |
| 4.318640492  | 6.152793076 | 20.498557091 |
| 2.880047681  | 6.983684356 | 17.999999523 |
| 1.440042509  | 2.826742879 | 22.742750645 |
| 1.034302566  | 3.548993694 | 27.135863304 |
| -0.694159226 | 4.919499266 | 27.589905262 |
| 2.360715221  | 7.235772030 | 27.301993370 |



|              |             |              |
|--------------|-------------|--------------|
| 0.656363075  | 5.753457203 | 27.577323914 |
| 1.472755450  | 2.800493428 | 25.827770233 |
| -2.539510888 | 4.710173096 | 26.270091534 |
| -2.746790204 | 5.813581719 | 27.341158390 |
| 5.580301371  | 0.013356001 | 26.240217686 |
| 0.261978020  | 4.886388636 | 27.864062786 |
| 1.393857685  | 7.301351504 | 27.187273502 |
| 1.494746169  | 2.723729081 | 26.792399883 |
| -2.404074778 | 4.908613433 | 27.215812206 |

Pt@Au\_Rf\_top

1.0

|               |              |               |
|---------------|--------------|---------------|
| 8.6400995255  | 0.0000000000 | 0.0000000000  |
| -4.3200497627 | 7.4825456803 | 0.0000000000  |
| 0.0000000000  | 0.0000000000 | 40.0000000000 |

Au Pt H O

26 1 9 4

Cartesian

|              |             |              |
|--------------|-------------|--------------|
| 0.002227944  | 0.335610203 | 22.953016758 |
| 1.440077399  | 1.170418401 | 20.470008850 |
| -0.000043130 | 1.995370371 | 17.999999523 |
| 2.879186505  | 0.336085577 | 22.952356339 |
| 4.320653782  | 1.163776317 | 20.469071865 |
| 2.880047681  | 1.995370371 | 17.999999523 |
| 5.761347721  | 0.333719103 | 22.910521030 |
| 7.200171151  | 1.163303785 | 20.469264984 |

|              |             |              |
|--------------|-------------|--------------|
| 5.760052102  | 1.995370371 | 17.999999523 |
| -1.436786050 | 2.827594728 | 22.949266434 |
| 0.005245431  | 3.655319223 | 20.467805862 |
| -1.440045470 | 4.489527587 | 17.999999523 |
| 2.875736828  | 3.655555601 | 20.467321873 |
| 1.440045341  | 4.489527587 | 17.999999523 |
| 4.317538800  | 2.827528052 | 22.949805260 |
| 5.760475424  | 3.655841706 | 20.474491119 |
| 4.320049763  | 4.489527587 | 17.999999523 |
| -2.880193181 | 5.323213467 | 22.928326130 |
| -1.437205428 | 6.154115004 | 20.474486351 |
| -2.880047552 | 6.983684356 | 17.999999523 |
| 0.000675152  | 5.319646849 | 22.952027321 |
| 1.439998992  | 6.152305159 | 20.469963551 |
| 0.000043259  | 6.983684356 | 17.999999523 |
| 2.879023108  | 5.319847101 | 22.951729298 |
| 4.317936501  | 6.153951770 | 20.473794937 |
| 2.880047681  | 6.983684356 | 17.999999523 |
| 1.440737359  | 2.829242009 | 22.842466831 |
| 1.437665186  | 2.857498881 | 24.410128593 |
| 1.030831405  | 3.553689793 | 27.325038910 |
| -0.693781738 | 4.917570786 | 27.862017155 |
| 2.363729201  | 7.239806050 | 27.566566467 |
| 0.660277257  | 5.749265747 | 27.848677635 |
| 1.475267829  | 2.792423604 | 26.025059223 |
| -2.543641221 | 4.705798336 | 26.543188095 |

|                     |                    |                     |
|---------------------|--------------------|---------------------|
| <b>-2.755645522</b> | <b>5.815363467</b> | <b>27.604780197</b> |
| <b>5.578500626</b>  | <b>0.020111623</b> | <b>26.513056755</b> |
| <b>0.269146682</b>  | <b>4.872485204</b> | <b>28.109843731</b> |
| <b>1.396787206</b>  | <b>7.300533104</b> | <b>27.456481457</b> |
| <b>1.494822388</b>  | <b>2.726534833</b> | <b>26.992554665</b> |
| <b>-2.406241405</b> | <b>4.912870450</b> | <b>27.485702038</b> |

**Pt@Au\_Rf\_fcc**

**1.0**

|                      |                     |                      |
|----------------------|---------------------|----------------------|
| <b>8.6400995255</b>  | <b>0.0000000000</b> | <b>0.0000000000</b>  |
| <b>-4.3200497627</b> | <b>7.4825456803</b> | <b>0.0000000000</b>  |
| <b>0.0000000000</b>  | <b>0.0000000000</b> | <b>40.0000000000</b> |

**Au Pt H O**

**26 1 9 4**

**Cartesian**

|                     |                    |                     |
|---------------------|--------------------|---------------------|
| <b>0.017959297</b>  | <b>0.325037346</b> | <b>22.934391499</b> |
| <b>1.446418923</b>  | <b>1.154197916</b> | <b>20.440030098</b> |
| <b>-0.000043130</b> | <b>1.995370371</b> | <b>17.999999523</b> |
| <b>2.904640130</b>  | <b>0.286527591</b> | <b>22.968375683</b> |
| <b>4.330327741</b>  | <b>1.158953555</b> | <b>20.464582443</b> |
| <b>2.880047681</b>  | <b>1.995370371</b> | <b>17.999999523</b> |
| <b>5.795923204</b>  | <b>0.311629749</b> | <b>22.941176891</b> |
| <b>7.203368918</b>  | <b>1.159379592</b> | <b>20.468740463</b> |
| <b>5.760052102</b>  | <b>1.995370371</b> | <b>17.999999523</b> |
| <b>-1.417733010</b> | <b>2.827004677</b> | <b>22.958734035</b> |
| <b>-0.006146278</b> | <b>3.660127713</b> | <b>20.453772545</b> |

|              |             |              |
|--------------|-------------|--------------|
| -1.440045470 | 4.489527587 | 17.999999523 |
| 2.891505695  | 3.656110641 | 20.442748070 |
| 1.440045341  | 4.489527587 | 17.999999523 |
| 4.375480589  | 2.829266984 | 22.973001003 |
| 5.759382100  | 3.650331890 | 20.483088493 |
| 4.320049763  | 4.489527587 | 17.999999523 |
| -2.854852725 | 5.307175506 | 22.972478867 |
| -1.434481389 | 6.157483154 | 20.479657650 |
| -2.880047552 | 6.983684356 | 17.999999523 |
| 0.011279312  | 5.303686937 | 22.940552235 |
| 1.446691030  | 6.151698160 | 20.465719700 |
| 0.000043259  | 6.983684356 | 17.999999523 |
| 2.894678806  | 5.307702671 | 22.934741974 |
| 4.330535990  | 6.146033138 | 20.483019352 |
| 2.880047681  | 6.983684356 | 17.999999523 |
| 1.412306431  | 2.840342142 | 22.775843143 |
| 2.627374759  | 2.149573408 | 23.708188534 |
| 2.457912386  | 2.675716661 | 26.789023876 |
| 0.702635447  | 4.077979939 | 27.070996761 |
| 3.775442621  | 6.408178880 | 26.731691360 |
| 2.048212556  | 4.910874179 | 27.059106827 |
| 2.932465751  | 1.833126389 | 25.563831329 |
| -1.103828800 | 3.896695226 | 25.638873577 |
| -1.384818579 | 4.932284144 | 26.758995056 |
| 2.722309314  | 6.595669160 | 25.610466003 |
| 1.639689994  | 4.072954027 | 27.401597500 |

|              |             |              |
|--------------|-------------|--------------|
| 2.813198881  | 6.468211075 | 26.578788757 |
| 2.942253202  | 1.836186246 | 26.531395912 |
| -1.026553897 | 4.037060391 | 26.607260704 |

Pt@Au\_Volmer

1.0

|               |              |               |
|---------------|--------------|---------------|
| 8.6400995255  | 0.0000000000 | 0.0000000000  |
| -4.3200497627 | 7.4825456803 | 0.0000000000  |
| 0.0000000000  | 0.0000000000 | 40.0000000000 |

Au Pt O H

26 1 4 9

Cartesian

|              |             |              |
|--------------|-------------|--------------|
| 0.003992300  | 0.349971253 | 22.922360897 |
| 1.436404168  | 1.168080163 | 20.439815521 |
| -0.000043130 | 1.995370371 | 17.999999523 |
| 2.864716427  | 0.353464003 | 22.891590595 |
| 4.322599350  | 1.164923526 | 20.447049141 |
| 2.880047681  | 1.995370371 | 17.999999523 |
| 5.755146017  | 0.330282604 | 22.912251949 |
| 7.196272612  | 1.162402096 | 20.453844070 |
| 5.760052102  | 1.995370371 | 17.999999523 |
| -1.426565058 | 2.826480411 | 22.909352779 |
| 0.001640887  | 3.658207038 | 20.441629887 |
| -1.440045470 | 4.489527587 | 17.999999523 |
| 2.876230188  | 3.659421481 | 20.443007946 |
| 1.440045599  | 4.489527587 | 17.999999523 |

|              |             |              |
|--------------|-------------|--------------|
| 4.299494707  | 2.833548754 | 22.910327911 |
| 5.759136192  | 3.658925758 | 20.456702709 |
| 4.320049763  | 4.489527587 | 17.999999523 |
| -2.885941452 | 5.321478549 | 22.920341492 |
| -1.441086007 | 6.151838648 | 20.456695557 |
| -2.880047423 | 6.983684356 | 17.999999523 |
| 0.008644881  | 5.310836228 | 22.910537720 |
| 1.440958676  | 6.155485545 | 20.450434685 |
| 0.000043517  | 6.983684356 | 17.999999523 |
| 2.869593382  | 5.311051644 | 22.926805019 |
| 4.316654433  | 6.154738950 | 20.466773510 |
| 2.880047681  | 6.983684356 | 17.999999523 |
| 1.432068660  | 2.829607501 | 22.850255966 |
| -0.634985709 | 4.156685476 | 26.750657558 |
| 1.418510388  | 2.890573831 | 25.908181667 |
| -0.644925146 | 6.773984888 | 26.013028622 |
| 5.655463414  | 2.996064013 | 26.031913757 |
| -0.668748071 | 5.103430957 | 26.427223682 |
| -1.480785561 | 3.724062359 | 26.434836388 |
| 2.201103321  | 3.444560742 | 26.103899479 |
| 0.576938475  | 3.440813943 | 26.202759743 |
| -1.559571187 | 7.114309894 | 26.063578129 |
| -0.443507897 | 6.796273908 | 25.042510033 |
| 1.402326954  | 2.851462123 | 24.544982910 |
| 5.557929060  | 3.101611951 | 25.050275326 |
| 5.690349098  | 2.028760417 | 26.161713600 |

**Pt@Au<sup>-</sup>\_Heyrovsky**

**1.0**

|                      |                     |                      |
|----------------------|---------------------|----------------------|
| <b>8.6400995255</b>  | <b>0.0000000000</b> | <b>0.0000000000</b>  |
| <b>-4.3200497627</b> | <b>7.4825456803</b> | <b>0.0000000000</b>  |
| <b>0.0000000000</b>  | <b>0.0000000000</b> | <b>40.0000000000</b> |

**Au Pt H O**

**26 1 10 4**

**Cartesian**

|                     |                    |                     |
|---------------------|--------------------|---------------------|
| <b>-0.005605361</b> | <b>0.328071921</b> | <b>22.952356339</b> |
| <b>1.439413963</b>  | <b>1.169303861</b> | <b>20.485203266</b> |
| <b>-0.000043130</b> | <b>1.995370371</b> | <b>17.999999523</b> |
| <b>2.882230627</b>  | <b>0.330024039</b> | <b>22.950699329</b> |
| <b>4.325837092</b>  | <b>1.160668739</b> | <b>20.473456383</b> |
| <b>2.880047681</b>  | <b>1.995370371</b> | <b>17.999999523</b> |
| <b>5.757847671</b>  | <b>0.331598260</b> | <b>22.983887196</b> |
| <b>7.194132893</b>  | <b>1.160238911</b> | <b>20.474319458</b> |
| <b>5.760052102</b>  | <b>1.995370371</b> | <b>17.999999523</b> |
| <b>-1.447841776</b> | <b>2.824901144</b> | <b>22.949767113</b> |
| <b>0.002806310</b>  | <b>3.655901692</b> | <b>20.484769344</b> |
| <b>-1.440045470</b> | <b>4.489527587</b> | <b>17.999999523</b> |
| <b>2.874023842</b>  | <b>3.655391698</b> | <b>20.485732555</b> |
| <b>1.440045599</b>  | <b>4.489527587</b> | <b>17.999999523</b> |
| <b>4.322096462</b>  | <b>2.824796782</b> | <b>22.950646877</b> |
| <b>5.758679010</b>  | <b>3.660416940</b> | <b>20.472323895</b> |
| <b>4.320049763</b>  | <b>4.489527587</b> | <b>17.999999523</b> |

|              |             |              |
|--------------|-------------|--------------|
| -2.880867963 | 5.320030851 | 22.982373238 |
| -1.441843944 | 6.151407372 | 20.474362373 |
| -2.880047423 | 6.983684356 | 17.999999523 |
| -0.002084165 | 5.326430871 | 22.954528332 |
| 1.439762869  | 6.158483520 | 20.474882126 |
| 0.000043517  | 6.983684356 | 17.999999523 |
| 2.879653713  | 5.325045166 | 22.951955795 |
| 4.321608895  | 6.151166981 | 20.474934578 |
| 2.880047681  | 6.983684356 | 17.999999523 |
| 1.433872413  | 2.825245229 | 22.844793797 |
| 1.475333362  | 2.852683924 | 24.606561661 |
| 0.769413308  | 3.600464133 | 27.268183231 |
| -0.918578248 | 4.882599913 | 27.604951859 |
| 0.429127315  | 5.736105342 | 27.580118179 |
| 1.349410309  | 2.814225821 | 25.490214825 |
| 2.131013302  | 2.744938349 | 27.270848751 |
| 5.876735461  | 4.639482526 | 26.318941116 |
| -2.995041582 | 5.741920664 | 27.385728359 |
| 5.193150136  | 0.097636003 | 26.306123734 |
| 2.001360048  | 7.405043436 | 27.357432842 |
| 0.047605424  | 4.856899481 | 27.855093479 |
| 1.210372648  | 2.726379849 | 26.933050156 |
| -2.616671672 | 4.850680534 | 27.260379791 |
| 1.034503026  | 7.339919768 | 27.238235474 |

**Rh@Au\_Rf\_sur**



1.0

|               |              |               |
|---------------|--------------|---------------|
| 8.6400995255  | 0.0000000000 | 0.0000000000  |
| -4.3200497627 | 7.4825456803 | 0.0000000000  |
| 0.0000000000  | 0.0000000000 | 40.0000000000 |

Au Rh H O

26 1 8 4

Cartesian

|              |             |              |
|--------------|-------------|--------------|
| 0.019466061  | 0.365528405 | 22.973496914 |
| 1.439732227  | 1.153786821 | 20.439391136 |
| -0.000043130 | 1.995370371 | 17.999999523 |
| 2.860123568  | 0.365792489 | 22.971329689 |
| 4.323561094  | 1.162007168 | 20.470414162 |
| 2.880047681  | 1.995370371 | 17.999999523 |
| 5.760244596  | 0.331895013 | 22.957050800 |
| 7.197506850  | 1.161278524 | 20.470347404 |
| 5.760052102  | 1.995370371 | 17.999999523 |
| -1.401303942 | 2.826167100 | 22.969417572 |
| -0.008407213 | 3.662994119 | 20.438504219 |
| -1.440045470 | 4.489527587 | 17.999999523 |
| 2.888310696  | 3.662652488 | 20.439174175 |
| 1.440045341  | 4.489527587 | 17.999999523 |
| 4.281269209  | 2.826604620 | 22.970840931 |
| 5.760346934  | 3.656487952 | 20.494835377 |
| 4.320049763  | 4.489527587 | 17.999999523 |
| -2.879333068 | 5.321244401 | 22.983503342 |
| -1.438332098 | 6.153187782 | 20.494816303 |

|                     |                    |                     |
|---------------------|--------------------|---------------------|
| <b>-2.880047552</b> | <b>6.983684356</b> | <b>17.999999523</b> |
| <b>0.020018179</b>  | <b>5.287050451</b> | <b>22.971789837</b> |
| <b>1.440429524</b>  | <b>6.155231774</b> | <b>20.471076965</b> |
| <b>0.000043259</b>  | <b>6.983684356</b> | <b>17.999999523</b> |
| <b>2.861396543</b>  | <b>5.286905949</b> | <b>22.972557545</b> |
| <b>4.319172735</b>  | <b>6.152559821</b> | <b>20.494432449</b> |
| <b>2.880047681</b>  | <b>6.983684356</b> | <b>17.999999523</b> |
| <b>1.439870631</b>  | <b>2.826541512</b> | <b>22.692596912</b> |
| <b>1.034070177</b>  | <b>3.547392797</b> | <b>27.064335346</b> |
| <b>-0.689935664</b> | <b>4.915761833</b> | <b>27.629883289</b> |
| <b>2.366552119</b>  | <b>7.240232867</b> | <b>27.333610058</b> |
| <b>0.659991438</b>  | <b>5.745486836</b> | <b>27.616293430</b> |
| <b>1.467029147</b>  | <b>2.809671771</b> | <b>25.744647980</b> |
| <b>-2.544192196</b> | <b>4.707414174</b> | <b>26.309330463</b> |
| <b>-2.757143242</b> | <b>5.818800300</b> | <b>27.371680737</b> |
| <b>5.580271487</b>  | <b>0.017935497</b> | <b>26.278007030</b> |
| <b>0.270319572</b>  | <b>4.871363082</b> | <b>27.886049747</b> |
| <b>1.398711724</b>  | <b>7.306039352</b> | <b>27.224931717</b> |
| <b>1.491508942</b>  | <b>2.726812687</b> | <b>26.708402634</b> |
| <b>-2.410412117</b> | <b>4.913937715</b> | <b>27.254114151</b> |

**Rh@Au\_Rf\_top**

**1.0**

|                      |                     |                      |
|----------------------|---------------------|----------------------|
| <b>8.6400995255</b>  | <b>0.0000000000</b> | <b>0.0000000000</b>  |
| <b>-4.3200497627</b> | <b>7.4825456803</b> | <b>0.0000000000</b>  |
| <b>0.0000000000</b>  | <b>0.0000000000</b> | <b>40.0000000000</b> |

**Au Rh H O**

**26 1 9 4**

**Cartesian**

|                     |                    |                     |
|---------------------|--------------------|---------------------|
| <b>0.016052836</b>  | <b>0.360077739</b> | <b>22.964365482</b> |
| <b>1.439954059</b>  | <b>1.164034213</b> | <b>20.439815521</b> |
| <b>-0.000043130</b> | <b>1.995370371</b> | <b>17.999999523</b> |
| <b>2.864198250</b>  | <b>0.359984610</b> | <b>22.964539528</b> |
| <b>4.322392839</b>  | <b>1.162950446</b> | <b>20.477168560</b> |
| <b>2.880047681</b>  | <b>1.995370371</b> | <b>17.999999523</b> |
| <b>5.760780202</b>  | <b>0.334105334</b> | <b>22.931423187</b> |
| <b>7.197811724</b>  | <b>1.162852885</b> | <b>20.476396084</b> |
| <b>5.760052102</b>  | <b>1.995370371</b> | <b>17.999999523</b> |
| <b>-1.409081483</b> | <b>2.828118995</b> | <b>22.962155342</b> |
| <b>0.000443149</b>  | <b>3.658711011</b> | <b>20.438890457</b> |
| <b>-1.440045470</b> | <b>4.489527587</b> | <b>17.999999523</b> |
| <b>2.880301442</b>  | <b>3.658564725</b> | <b>20.439031124</b> |
| <b>1.440045341</b>  | <b>4.489527587</b> | <b>17.999999523</b> |
| <b>4.289602391</b>  | <b>2.828397295</b> | <b>22.963445187</b> |
| <b>5.760283719</b>  | <b>3.656374446</b> | <b>20.488147736</b> |
| <b>4.320049763</b>  | <b>4.489527587</b> | <b>17.999999523</b> |
| <b>-2.879734261</b> | <b>5.323745093</b> | <b>22.951245308</b> |
| <b>-1.437874272</b> | <b>6.153846069</b> | <b>20.487601757</b> |
| <b>-2.880047552</b> | <b>6.983684356</b> | <b>17.999999523</b> |
| <b>0.015203022</b>  | <b>5.295372708</b> | <b>22.964475155</b> |
| <b>1.440074438</b>  | <b>6.155502493</b> | <b>20.476670265</b> |
| <b>0.000043259</b>  | <b>6.983684356</b> | <b>17.999999523</b> |

|              |             |              |
|--------------|-------------|--------------|
| 2.866069048  | 5.296143386 | 22.963850498 |
| 4.318182151  | 6.153558403 | 20.486688614 |
| 2.880047681  | 6.983684356 | 17.999999523 |
| 1.440937561  | 2.828813185 | 22.751836777 |
| 1.438498440  | 2.849095453 | 24.310295582 |
| 1.032625759  | 3.551282092 | 27.169651985 |
| -0.692474693 | 4.919291879 | 27.715866566 |
| 2.363450591  | 7.238965796 | 27.420613766 |
| 0.657233666  | 5.749960161 | 27.702670097 |
| 1.473821479  | 2.793853908 | 25.862746239 |
| -2.542852867 | 4.705772915 | 26.395545006 |
| -2.753231764 | 5.815003103 | 27.459442616 |
| 5.578757310  | 0.018426276 | 26.364588737 |
| 0.267467042  | 4.876578988 | 27.972817421 |
| 1.396836902  | 7.302817042 | 27.310843468 |
| 1.494851871  | 2.726355766 | 26.834528446 |
| -2.406241373 | 4.911935200 | 27.340414524 |

Rh@Au\_Rf\_fcc

1.0

|               |              |               |
|---------------|--------------|---------------|
| 8.6400995255  | 0.0000000000 | 0.0000000000  |
| -4.3200497627 | 7.4825456803 | 0.0000000000  |
| 0.0000000000  | 0.0000000000 | 40.0000000000 |

Au Rh H O

26 1 9 4

Cartesian

|              |             |              |
|--------------|-------------|--------------|
| 0.026726117  | 0.336419153 | 22.959113121 |
| 1.444676132  | 1.158349790 | 20.445790291 |
| -0.000043130 | 1.995370371 | 17.999999523 |
| 2.889782071  | 0.298686878 | 22.992284298 |
| 4.329350290  | 1.159043646 | 20.481963158 |
| 2.880047681  | 1.995370371 | 17.999999523 |
| 5.800725454  | 0.309150075 | 22.950036526 |
| 7.203341237  | 1.162560201 | 20.474221706 |
| 5.760052102  | 1.995370371 | 17.999999523 |
| -1.390119533 | 2.821372213 | 22.971439362 |
| -0.009776829 | 3.662755958 | 20.448861122 |
| -1.440045470 | 4.489527587 | 17.999999523 |
| 2.887557781  | 3.657778660 | 20.448133945 |
| 1.440045341  | 4.489527587 | 17.999999523 |
| 4.356256912  | 2.835409443 | 22.994189262 |
| 5.756153112  | 3.651742125 | 20.493519306 |
| 4.320049763  | 4.489527587 | 17.999999523 |
| -2.845108212 | 5.300292473 | 22.996580601 |
| -1.437314091 | 6.159240373 | 20.492599010 |
| -2.880047552 | 6.983684356 | 17.999999523 |
| 0.030803101  | 5.282287676 | 22.955477238 |
| 1.444475286  | 6.150830701 | 20.473198891 |
| 0.000043259  | 6.983684356 | 17.999999523 |
| 2.890449450  | 5.295886939 | 22.966418266 |
| 4.327997089  | 6.147281923 | 20.498056412 |
| 2.880047681  | 6.983684356 | 17.999999523 |

|              |             |              |
|--------------|-------------|--------------|
| 1.454353310  | 2.817439434 | 22.721054554 |
| 2.626738488  | 2.145904657 | 23.720972538 |
| 2.458032121  | 2.672254852 | 26.890299320 |
| 0.707598922  | 4.075422160 | 27.191097736 |
| 3.779237325  | 6.402498248 | 26.858487129 |
| 2.059545943  | 4.901540407 | 27.177672386 |
| 2.927315336  | 1.848282173 | 25.645837784 |
| -1.125139475 | 3.875506474 | 25.789539814 |
| -1.377118834 | 4.940290637 | 26.889395714 |
| 2.703828381  | 6.625884394 | 25.763590336 |
| 1.646650085  | 4.063923531 | 27.517864704 |
| 2.816013559  | 6.464862994 | 26.723730564 |
| 2.940093655  | 1.836772617 | 26.614484787 |
| -1.024002250 | 4.042385565 | 26.750204563 |

**Rh@Au\_Volmer**

**1.0**

|               |              |               |
|---------------|--------------|---------------|
| 8.6400995255  | 0.0000000000 | 0.0000000000  |
| -4.3200497627 | 7.4825456803 | 0.0000000000  |
| 0.0000000000  | 0.0000000000 | 40.0000000000 |

| Au | Rh | O | H |
|----|----|---|---|
| 26 | 1  | 4 | 9 |

**Cartesian**

|              |             |              |
|--------------|-------------|--------------|
| 0.012575060  | 0.367319156 | 22.936463356 |
| 1.436603212  | 1.165360489 | 20.435128212 |
| -0.000043130 | 1.995370371 | 17.999999523 |

|              |             |              |
|--------------|-------------|--------------|
| 2.854536039  | 0.372807341 | 22.909111977 |
| 4.324057930  | 1.164878703 | 20.453050137 |
| 2.880047681  | 1.995370371 | 17.999999523 |
| 5.752773023  | 0.333461513 | 22.939608097 |
| 7.194917158  | 1.161448560 | 20.459933281 |
| 5.760052102  | 1.995370371 | 17.999999523 |
| -1.406961591 | 2.827249974 | 22.924706936 |
| -0.001467593 | 3.661111800 | 20.436491966 |
| -1.440045470 | 4.489527587 | 17.999999523 |
| 2.880237841  | 3.662976057 | 20.438253880 |
| 1.440045599  | 4.489527587 | 17.999999523 |
| 4.279147192  | 2.836001278 | 22.923817635 |
| 5.760203638  | 3.660366543 | 20.466866493 |
| 4.320049763  | 4.489527587 | 17.999999523 |
| -2.886290455 | 5.322581047 | 22.942204475 |
| -1.442049554 | 6.152404615 | 20.468139648 |
| -2.880047423 | 6.983684356 | 17.999999523 |
| 0.018501790  | 5.296582691 | 22.923200130 |
| 1.441442767  | 6.158484412 | 20.457007885 |
| 0.000043517  | 6.983684356 | 17.999999523 |
| 2.860061946  | 5.297897483 | 22.943258286 |
| 4.318631995  | 6.154554309 | 20.474703312 |
| 2.880047681  | 6.983684356 | 17.999999523 |
| 1.430166673  | 2.831506323 | 22.759864330 |
| -0.611923424 | 4.140662233 | 26.738855839 |
| 1.419277594  | 2.888329364 | 25.817716122 |

|              |             |              |
|--------------|-------------|--------------|
| -0.637818026 | 6.773164258 | 26.048271656 |
| 5.650818590  | 2.987863290 | 26.068143845 |
| -0.654824027 | 5.093116888 | 26.434745789 |
| -1.466428604 | 3.714400335 | 26.440200806 |
| 2.204630874  | 3.445258947 | 25.994434357 |
| 0.584394244  | 3.435672964 | 26.134996414 |
| -1.551159855 | 7.115718345 | 26.099088192 |
| -0.428703220 | 6.810024810 | 25.080835819 |
| 1.380963879  | 2.846960254 | 24.447979927 |
| 5.527389634  | 3.097512370 | 25.090556145 |
| 5.698266556  | 2.020830635 | 26.192107201 |

**Rh@Au<sup>-</sup>\_Heyrovsky**

**1.0**

|               |              |               |
|---------------|--------------|---------------|
| 8.6400995255  | 0.0000000000 | 0.0000000000  |
| -4.3200497627 | 7.4825456803 | 0.0000000000  |
| 0.0000000000  | 0.0000000000 | 40.0000000000 |

**Au Rh H O**

**26 1 10 4**

**Cartesian**

|              |             |              |
|--------------|-------------|--------------|
| -0.000043130 | 1.995370371 | 17.999999523 |
| 2.880047681  | 1.995370371 | 17.999999523 |
| 5.760052102  | 1.995370371 | 17.999999523 |
| -1.440045470 | 4.489527587 | 17.999999523 |
| 1.440045341  | 4.489527587 | 17.999999523 |
| 4.320049763  | 4.489527587 | 17.999999523 |



|              |             |              |
|--------------|-------------|--------------|
| -2.880047552 | 6.983684356 | 17.999999523 |
| 0.000043259  | 6.983684356 | 17.999999523 |
| 2.880047681  | 6.983684356 | 17.999999523 |
| 0.006177676  | 0.346815982 | 22.979199886 |
| 1.439397355  | 1.173936628 | 20.487198830 |
| 2.868469755  | 0.349210414 | 22.979199886 |
| 4.322425605  | 1.163460998 | 20.476799011 |
| 5.757027727  | 0.331252307 | 22.952399254 |
| 7.197073293  | 1.162712731 | 20.476799011 |
| -1.426221286 | 2.825558986 | 22.978401184 |
| 0.006004913  | 3.654400475 | 20.486400127 |
| 2.870154593  | 3.653427761 | 20.488801003 |
| 4.297542508  | 2.826082584 | 22.981200218 |
| 5.758496704  | 3.659039709 | 20.487198830 |
| -2.881948445 | 5.320015241 | 22.985200882 |
| -1.440174990 | 6.153421037 | 20.488400459 |
| 0.006825678  | 5.304975415 | 22.982399464 |
| 1.439483745  | 6.155067202 | 20.477199554 |
| 2.868167375  | 5.304227036 | 22.980000973 |
| 4.319444649  | 6.152598177 | 20.486800671 |
| 1.431102925  | 2.825783322 | 22.837600708 |
| 1.494564507  | 2.852945054 | 24.559600353 |
| 0.768191236  | 3.617361972 | 27.207200527 |
| -0.914900189 | 4.874729003 | 27.597999573 |
| 0.429672174  | 5.733275953 | 27.574400902 |
| 1.337228090  | 2.823763190 | 25.436799526 |

|              |             |              |
|--------------|-------------|--------------|
| 2.121187549  | 2.741080942 | 27.197999954 |
| 5.877038790  | 4.639253285 | 26.314799786 |
| -2.993146387 | 5.740534067 | 27.383201122 |
| 5.189719175  | 0.093307348 | 26.307199001 |
| 1.999405403  | 7.402183273 | 27.356400490 |
| 0.053741531  | 4.847941236 | 27.838799953 |
| 1.204214010  | 2.748264129 | 26.848399639 |
| -2.615401320 | 4.849662329 | 27.256400585 |
| 1.033269625  | 7.333642842 | 27.238399982 |

**Pd@Au\_Rf\_sur**

**1.0**

|               |              |               |
|---------------|--------------|---------------|
| 8.6400995255  | 0.0000000000 | 0.0000000000  |
| -4.3200497627 | 7.4825456803 | 0.0000000000  |
| 0.0000000000  | 0.0000000000 | 40.0000000000 |

**Au Pd H O**

**26 1 8 4**

**Cartesian**

|              |             |              |
|--------------|-------------|--------------|
| 0.006805336  | 0.343897199 | 22.960309982 |
| 1.439981225  | 1.159298866 | 20.468790531 |
| -0.000043130 | 1.995370371 | 17.999999523 |
| 2.874126663  | 0.345005132 | 22.959573269 |
| 4.321913705  | 1.162968621 | 20.480182171 |
| 2.880047681  | 1.995370371 | 17.999999523 |
| 5.760391980  | 0.331865410 | 22.971868515 |
| 7.198681156  | 1.163182698 | 20.479969978 |

|              |             |              |
|--------------|-------------|--------------|
| 5.760052102  | 1.995370371 | 17.999999523 |
| -1.426293272 | 2.825833942 | 22.959694862 |
| -0.003611754 | 3.660630795 | 20.469079018 |
| -1.440045470 | 4.489527587 | 17.999999523 |
| 2.883877276  | 3.660276898 | 20.468561649 |
| 1.440045341  | 4.489527587 | 17.999999523 |
| 4.306105377  | 2.826470376 | 22.959761620 |
| 5.760177631  | 3.659496408 | 20.482971668 |
| 4.320049763  | 4.489527587 | 17.999999523 |
| -2.879431254 | 5.321042812 | 22.975971699 |
| -1.440714828 | 6.151749449 | 20.483152866 |
| -2.880047552 | 6.983684356 | 17.999999523 |
| 0.007207028  | 5.308881435 | 22.962055206 |
| 1.440003884  | 6.154052119 | 20.480129719 |
| 0.000043259  | 6.983684356 | 17.999999523 |
| 2.872846832  | 5.309335011 | 22.960376740 |
| 4.321143087  | 6.151735624 | 20.482130051 |
| 2.880047681  | 6.983684356 | 17.999999523 |
| 1.439586099  | 2.826615993 | 22.779626846 |
| 1.034667437  | 3.547374288 | 27.169027328 |
| -0.693828087 | 4.919343614 | 27.629339695 |
| 2.362677076  | 7.238467175 | 27.335510254 |
| 0.657824359  | 5.751227231 | 27.616159916 |
| 1.472899261  | 2.800736718 | 25.861320496 |
| -2.542182045 | 4.707424432 | 26.307334900 |
| -2.751500045 | 5.814014780 | 27.374448776 |

|              |             |              |
|--------------|-------------|--------------|
| 5.580026989  | 0.016308299 | 26.276557446 |
| 0.262588026  | 4.884475320 | 27.902462482 |
| 1.394824836  | 7.301409483 | 27.221713066 |
| 1.495603499  | 2.722469370 | 26.824216843 |
| -2.404504022 | 4.910750639 | 27.251620293 |

**Pd@Au\_Rf\_top**

**1.0**

|               |              |               |
|---------------|--------------|---------------|
| 8.6400995255  | 0.0000000000 | 0.0000000000  |
| -4.3200497627 | 7.4825456803 | 0.0000000000  |
| 0.0000000000  | 0.0000000000 | 40.0000000000 |

**Au Pd H O**

**26 1 9 4**

**Cartesian**

|              |             |              |
|--------------|-------------|--------------|
| 0.003768697  | 0.336786095 | 22.951891422 |
| 1.440178659  | 1.170131738 | 20.471000671 |
| -0.000043130 | 1.995370371 | 17.999999523 |
| 2.877120284  | 0.337502195 | 22.952504158 |
| 4.319371907  | 1.164267914 | 20.475916862 |
| 2.880047681  | 1.995370371 | 17.999999523 |
| 5.760843433  | 0.333157345 | 22.918763161 |
| 7.200948915  | 1.164248179 | 20.475590229 |
| 5.760052102  | 1.995370371 | 17.999999523 |
| -1.433791093 | 2.827060204 | 22.950003147 |
| 0.005134065  | 3.655495391 | 20.468504429 |
| -1.440045470 | 4.489527587 | 17.999999523 |

|              |             |              |
|--------------|-------------|--------------|
| 2.875951707  | 3.655742695 | 20.468394756 |
| 1.440045341  | 4.489527587 | 17.999999523 |
| 4.313639295  | 2.827019618 | 22.951159477 |
| 5.760155358  | 3.655603991 | 20.478050709 |
| 4.320049763  | 4.489527587 | 17.999999523 |
| -2.880288986 | 5.322344224 | 22.926683426 |
| -1.437131785 | 6.153753303 | 20.478003025 |
| -2.880047552 | 6.983684356 | 17.999999523 |
| 0.002160641  | 5.314871586 | 22.953388691 |
| 1.440079846  | 6.151387302 | 20.476422310 |
| 0.000043259  | 6.983684356 | 17.999999523 |
| 2.877355055  | 5.315381804 | 22.953491211 |
| 4.317534036  | 6.153898697 | 20.477201939 |
| 2.880047681  | 6.983684356 | 17.999999523 |
| 1.440412915  | 2.828771039 | 22.846369743 |
| 1.441670392  | 2.861084453 | 24.416856766 |
| 1.030410014  | 3.555234495 | 27.288744450 |
| -0.696130865 | 4.924827116 | 27.840867043 |
| 2.358901169  | 7.242050294 | 27.549080849 |
| 0.653701092  | 5.756761131 | 27.828073502 |
| 1.470460268  | 2.800903520 | 25.978252888 |
| -2.543509721 | 4.713129594 | 26.521015167 |
| -2.752901913 | 5.818657136 | 27.587549686 |
| 5.576312468  | 0.020314935 | 26.492497921 |
| 0.262925087  | 4.884456142 | 28.103873730 |
| 1.393304843  | 7.307295272 | 27.438867092 |

|              |             |              |
|--------------|-------------|--------------|
| 1.491346463  | 2.731398402 | 26.950626373 |
| -2.408819864 | 4.915174904 | 27.465927601 |

Pd@Au\_Rf\_fcc

1.0

|               |              |               |
|---------------|--------------|---------------|
| 8.6400995255  | 0.0000000000 | 0.0000000000  |
| -4.3200497627 | 7.4825456803 | 0.0000000000  |
| 0.0000000000  | 0.0000000000 | 40.0000000000 |

Au Pd H O

26 1 9 4

Cartesian

|              |             |              |
|--------------|-------------|--------------|
| -0.003790279 | 0.331844170 | 22.922518253 |
| 1.444495563  | 1.161748157 | 20.459761620 |
| -0.000043130 | 1.995370371 | 17.999999523 |
| 2.870167677  | 0.282027590 | 23.000679016 |
| 4.319351822  | 1.165119763 | 20.472238064 |
| 2.880047681  | 1.995370371 | 17.999999523 |
| 5.777362656  | 0.322198564 | 22.926385403 |
| 7.199781240  | 1.166716647 | 20.469303131 |
| 5.760052102  | 1.995370371 | 17.999999523 |
| -1.424845796 | 2.830181719 | 22.947266102 |
| 0.003481075  | 3.655162010 | 20.477085114 |
| -1.440045470 | 4.489527587 | 17.999999523 |
| 2.884452004  | 3.655686723 | 20.462162495 |
| 1.440045341  | 4.489527587 | 17.999999523 |
| 4.361326216  | 2.861383716 | 23.003861904 |

|              |             |              |
|--------------|-------------|--------------|
| 5.753687984  | 3.653049558 | 20.479922295 |
| 4.320049763  | 4.489527587 | 17.999999523 |
| -2.858081472 | 5.308187467 | 22.959063053 |
| -1.439346113 | 6.160745604 | 20.479123592 |
| -2.880047552 | 6.983684356 | 17.999999523 |
| 0.004904765  | 5.307141610 | 22.935776711 |
| 1.438345101  | 6.151217378 | 20.468862057 |
| 0.000043259  | 6.983684356 | 17.999999523 |
| 2.878352848  | 5.324321763 | 22.926888466 |
| 4.325478530  | 6.149034235 | 20.474033356 |
| 2.880047681  | 6.983684356 | 17.999999523 |
| 1.435845082  | 2.828270410 | 22.812111378 |
| 2.795986754  | 2.047095696 | 23.665535450 |
| 2.454047772  | 2.675810543 | 26.854517460 |
| 0.709084668  | 4.075163930 | 27.159657478 |
| 3.780476649  | 6.398294750 | 26.838381290 |
| 2.061118207  | 4.900429880 | 27.143905163 |
| 2.937882996  | 1.851736735 | 25.616230965 |
| -1.137275216 | 3.865204893 | 25.784208775 |
| -1.370449198 | 4.945333050 | 26.873664856 |
| 2.699184458  | 6.642116363 | 25.753619671 |
| 1.650592849  | 4.059672757 | 27.477803230 |
| 2.813934286  | 6.459449067 | 26.707746983 |
| 2.933283684  | 1.835960015 | 26.583309174 |
| -1.017031731 | 4.044321182 | 26.738862991 |

**Pd@Au\_Volmer**

**1.0**

|                      |                     |                      |
|----------------------|---------------------|----------------------|
| <b>8.6400995255</b>  | <b>0.0000000000</b> | <b>0.0000000000</b>  |
| <b>-4.3200497627</b> | <b>7.4825456803</b> | <b>0.0000000000</b>  |
| <b>0.0000000000</b>  | <b>0.0000000000</b> | <b>40.0000000000</b> |

**Au Pd O H**

**26 1 4 9**

**Cartesian**

|                     |                    |                     |
|---------------------|--------------------|---------------------|
| <b>0.000296280</b>  | <b>0.342584999</b> | <b>22.913637161</b> |
| <b>1.434348521</b>  | <b>1.169359833</b> | <b>20.441114902</b> |
| <b>-0.000043130</b> | <b>1.995370371</b> | <b>17.999999523</b> |
| <b>2.865235617</b>  | <b>0.345180854</b> | <b>22.873232365</b> |
| <b>4.320209217</b>  | <b>1.163381388</b> | <b>20.445656776</b> |
| <b>2.880047681</b>  | <b>1.995370371</b> | <b>17.999999523</b> |
| <b>5.755231473</b>  | <b>0.324189483</b> | <b>22.901983261</b> |
| <b>7.198057182</b>  | <b>1.161462609</b> | <b>20.454888344</b> |
| <b>5.760052102</b>  | <b>1.995370371</b> | <b>17.999999523</b> |
| <b>-1.431266676</b> | <b>2.824219442</b> | <b>22.896864414</b> |
| <b>0.004172449</b>  | <b>3.653292179</b> | <b>20.446300507</b> |
| <b>-1.440045470</b> | <b>4.489527587</b> | <b>17.999999523</b> |
| <b>2.869293916</b>  | <b>3.655686500</b> | <b>20.446805954</b> |
| <b>1.440045599</b>  | <b>4.489527587</b> | <b>17.999999523</b> |
| <b>4.301378540</b>  | <b>2.829103973</b> | <b>22.889719009</b> |
| <b>5.758096814</b>  | <b>3.658174034</b> | <b>20.447201729</b> |
| <b>4.320049763</b>  | <b>4.489527587</b> | <b>17.999999523</b> |
| <b>-2.889622183</b> | <b>5.316171660</b> | <b>22.903437614</b> |



|              |             |              |
|--------------|-------------|--------------|
| -1.443942400 | 6.148833092 | 20.448400974 |
| -2.880047423 | 6.983684356 | 17.999999523 |
| 0.005106899  | 5.306411963 | 22.896533012 |
| 1.440088343  | 6.150204971 | 20.452160835 |
| 0.000043517  | 6.983684356 | 17.999999523 |
| 2.866950453  | 5.308306994 | 22.920699120 |
| 4.315442404  | 6.152033102 | 20.461044312 |
| 2.880047681  | 6.983684356 | 17.999999523 |
| 1.432619957  | 2.815568487 | 22.846317291 |
| -0.691131342 | 4.191427108 | 26.825733185 |
| 1.548608851  | 2.861359632 | 26.230552197 |
| -0.651119446 | 6.813769380 | 26.005053520 |
| 5.613648538  | 2.976821581 | 26.027534008 |
| -0.705043283 | 5.117922655 | 26.460356712 |
| -1.506034237 | 3.746557429 | 26.465716362 |
| 2.270691997  | 3.515281864 | 26.180758476 |
| 0.706944755  | 3.399619886 | 26.392967701 |
| -1.557913949 | 7.173882714 | 26.050763130 |
| -0.440252130 | 6.837944956 | 25.038621426 |
| 1.436596453  | 2.745983983 | 24.411613941 |
| 5.506803808  | 3.083379920 | 25.048813820 |
| 5.656906802  | 2.010291563 | 26.155619621 |

**Pd@Au\_Heyrovsky**

**1.0**

|                     |                     |                     |
|---------------------|---------------------|---------------------|
| <b>8.6400995255</b> | <b>0.0000000000</b> | <b>0.0000000000</b> |
|---------------------|---------------------|---------------------|

|                      |                     |                      |
|----------------------|---------------------|----------------------|
| <b>-4.3200497627</b> | <b>7.4825456803</b> | <b>0.0000000000</b>  |
| <b>0.0000000000</b>  | <b>0.0000000000</b> | <b>40.0000000000</b> |

**Au Pd H O**

**26 1 10 4**

**Cartesian**

|                     |                    |                     |
|---------------------|--------------------|---------------------|
| <b>-0.002281873</b> | <b>0.329496789</b> | <b>22.944400311</b> |
| <b>1.440459007</b>  | <b>1.178052934</b> | <b>20.501563549</b> |
| <b>-0.000043130</b> | <b>1.995370371</b> | <b>17.999999523</b> |
| <b>2.882927248</b>  | <b>0.330772250</b> | <b>22.944734097</b> |
| <b>4.320580138</b>  | <b>1.163811996</b> | <b>20.472002029</b> |
| <b>2.880047681</b>  | <b>1.995370371</b> | <b>17.999999523</b> |
| <b>5.759822835</b>  | <b>0.331815598</b> | <b>22.949123383</b> |
| <b>7.200166774</b>  | <b>1.163641403</b> | <b>20.472333431</b> |
| <b>5.760052102</b>  | <b>1.995370371</b> | <b>17.999999523</b> |
| <b>-1.444573375</b> | <b>2.825749872</b> | <b>22.943127155</b> |
| <b>0.011847733</b>  | <b>3.651642668</b> | <b>20.500805378</b> |
| <b>-1.440045470</b> | <b>4.489527587</b> | <b>17.999999523</b> |
| <b>2.867897906</b>  | <b>3.651163893</b> | <b>20.501947403</b> |
| <b>1.440045599</b>  | <b>4.489527587</b> | <b>17.999999523</b> |
| <b>4.322812942</b>  | <b>2.825752771</b> | <b>22.944481373</b> |
| <b>5.759922196</b>  | <b>3.658872907</b> | <b>20.467920303</b> |
| <b>4.320049763</b>  | <b>4.489527587</b> | <b>17.999999523</b> |
| <b>-2.879729208</b> | <b>5.320842560</b> | <b>22.949960232</b> |
| <b>-1.440416649</b> | <b>6.151878788</b> | <b>20.468933582</b> |
| <b>-2.880047423</b> | <b>6.983684356</b> | <b>17.999999523</b> |
| <b>-0.001077874</b> | <b>5.325110728</b> | <b>22.946615219</b> |

|              |             |              |
|--------------|-------------|--------------|
| 1.440045084  | 6.152326120 | 20.472786427 |
| 0.000043517  | 6.983684356 | 17.999999523 |
| 2.881194821  | 5.324109916 | 22.944626808 |
| 4.320919581  | 6.152186970 | 20.468814373 |
| 2.880047681  | 6.983684356 | 17.999999523 |
| 1.436451226  | 2.826603282 | 22.924151421 |
| 1.440844348  | 2.841049044 | 24.637315273 |
| 0.730629792  | 3.683406841 | 27.230081558 |
| -0.908130516 | 4.861899080 | 27.594206333 |
| 0.454097380  | 5.712142059 | 27.567009926 |
| 1.324273129  | 2.831228468 | 25.636820793 |
| 2.098096296  | 2.755637979 | 27.251110077 |
| 5.895821250  | 4.637503648 | 26.348156929 |
| -2.977562658 | 5.737995467 | 27.417657375 |
| 5.176846665  | 0.085123928 | 26.343512535 |
| 1.988680478  | 7.400620955 | 27.392714024 |
| 0.068241591  | 4.823259010 | 27.818179131 |
| 1.195173102  | 2.790763389 | 26.862857342 |
| -2.581086293 | 4.856276873 | 27.284958363 |
| 1.026837399  | 7.298667955 | 27.265734673 |

Ni@Au\_Rf\_sur

1.0

|               |              |               |
|---------------|--------------|---------------|
| 8.6400995255  | 0.0000000000 | 0.0000000000  |
| -4.3200497627 | 7.4825456803 | 0.0000000000  |
| 0.0000000000  | 0.0000000000 | 40.0000000000 |

**Au Ni H O**

**26 1 8 4**

**Cartesian**

|                     |                    |                     |
|---------------------|--------------------|---------------------|
| <b>0.027711937</b>  | <b>0.383978750</b> | <b>22.961924076</b> |
| <b>1.439963136</b>  | <b>1.165861341</b> | <b>20.478334427</b> |
| <b>-0.000043130</b> | <b>1.995370371</b> | <b>17.999999523</b> |
| <b>2.851194477</b>  | <b>0.385550825</b> | <b>22.961587906</b> |
| <b>4.324573435</b>  | <b>1.160946816</b> | <b>20.483436584</b> |
| <b>2.880047681</b>  | <b>1.995370371</b> | <b>17.999999523</b> |
| <b>5.759417313</b>  | <b>0.331868616</b> | <b>22.980120182</b> |
| <b>7.195483068</b>  | <b>1.160929534</b> | <b>20.483317375</b> |
| <b>5.760052102</b>  | <b>1.995370371</b> | <b>17.999999523</b> |
| <b>-1.380844015</b> | <b>2.825003946</b> | <b>22.962279320</b> |
| <b>0.001476734</b>  | <b>3.657300108</b> | <b>20.478467941</b> |
| <b>-1.440045470</b> | <b>4.489527587</b> | <b>17.999999523</b> |
| <b>2.878319503</b>  | <b>3.657013111</b> | <b>20.478484631</b> |
| <b>1.440045341</b>  | <b>4.489527587</b> | <b>17.999999523</b> |
| <b>4.260852942</b>  | <b>2.825620757</b> | <b>22.961411476</b> |
| <b>5.760417745</b>  | <b>3.658075246</b> | <b>20.495710373</b> |
| <b>4.320049763</b>  | <b>4.489527587</b> | <b>17.999999523</b> |
| <b>-2.879381316</b> | <b>5.320432246</b> | <b>22.974560261</b> |
| <b>-1.440332834</b> | <b>6.151882356</b> | <b>20.496256351</b> |
| <b>-2.880047552</b> | <b>6.983684356</b> | <b>17.999999523</b> |
| <b>0.031145569</b>  | <b>5.270880475</b> | <b>22.963185310</b> |
| <b>1.440105595</b>  | <b>6.157229830</b> | <b>20.483293533</b> |
| <b>0.000043259</b>  | <b>6.983684356</b> | <b>17.999999523</b> |

|              |             |              |
|--------------|-------------|--------------|
| 2.849399850  | 5.271260462 | 22.961702347 |
| 4.320973912  | 6.151720014 | 20.494456291 |
| 2.880047681  | 6.983684356 | 17.999999523 |
| 1.437511719  | 2.827492372 | 22.605462074 |
| 1.033923534  | 3.549335326 | 27.026534081 |
| -0.693461801 | 4.919165216 | 27.480897903 |
| 2.361002071  | 7.236382150 | 27.191772461 |
| 0.656672584  | 5.752390831 | 27.468411922 |
| 1.473145169  | 2.800126151 | 25.722403526 |
| -2.539577515 | 4.710908541 | 26.158511639 |
| -2.748221361 | 5.814108884 | 27.230937481 |
| 5.581218788  | 0.012773152 | 26.128010750 |
| 0.262137152  | 4.885891352 | 27.755837440 |
| 1.394820716  | 7.303146186 | 27.077264786 |
| 1.495234123  | 2.722668506 | 26.683216095 |
| -2.406175647 | 4.908664276 | 27.105436325 |

Ni@Au\_Rf\_top

1.0

|               |              |               |
|---------------|--------------|---------------|
| 8.6400995255  | 0.0000000000 | 0.0000000000  |
| -4.3200497627 | 7.4825456803 | 0.0000000000  |
| 0.0000000000  | 0.0000000000 | 40.0000000000 |

Au Ni H O

26 1 9 4

Cartesian

|             |             |              |
|-------------|-------------|--------------|
| 0.019917112 | 0.369516989 | 22.930338383 |
|-------------|-------------|--------------|

|              |             |              |
|--------------|-------------|--------------|
| 1.440123620  | 1.178056279 | 20.476784706 |
| -0.000043130 | 1.995370371 | 17.999999523 |
| 2.859595092  | 0.370566135 | 22.929444313 |
| 4.323183349  | 1.162543699 | 20.468473434 |
| 2.880047681  | 1.995370371 | 17.999999523 |
| 5.760492741  | 0.332171669 | 22.928731441 |
| 7.197780246  | 1.162066262 | 20.468389988 |
| 5.760052102  | 1.995370371 | 17.999999523 |
| -1.396572938 | 2.823902117 | 22.928287983 |
| 0.011168075  | 3.652218224 | 20.474500656 |
| -1.440045470 | 4.489527587 | 17.999999523 |
| 2.869253231  | 3.652098920 | 20.473940372 |
| 1.440045341  | 4.489527587 | 17.999999523 |
| 4.276182394  | 2.824370634 | 22.928416729 |
| 5.760418003  | 3.658292446 | 20.478298664 |
| 4.320049763  | 4.489527587 | 17.999999523 |
| -2.879988328 | 5.322080641 | 22.925035954 |
| -1.438741644 | 6.152957648 | 20.478610992 |
| -2.880047552 | 6.983684356 | 17.999999523 |
| 0.023270598  | 5.282842047 | 22.934150696 |
| 1.440074181  | 6.154812539 | 20.469830036 |
| 0.000043259  | 6.983684356 | 17.999999523 |
| 2.856447746  | 5.282729210 | 22.932159901 |
| 4.319580349  | 6.152806456 | 20.477654934 |
| 2.880047681  | 6.983684356 | 17.999999523 |
| 1.439010855  | 2.830263336 | 22.678387165 |

|              |             |              |
|--------------|-------------|--------------|
| 1.441337837  | 2.866054839 | 24.156677723 |
| 1.011975816  | 3.573165034 | 27.101173401 |
| -0.715370765 | 4.944949495 | 27.650766373 |
| 2.341336660  | 7.267452802 | 27.352333069 |
| 0.635858488  | 5.774357843 | 27.636835575 |
| 1.447795942  | 2.824070034 | 25.786967278 |
| -2.567185633 | 4.729606414 | 26.332728863 |
| -2.780130467 | 5.842412140 | 27.391533852 |
| 5.554804498  | 0.046208352 | 26.298696995 |
| 0.244017484  | 4.902458263 | 27.910635471 |
| 1.374495603  | 7.329719429 | 27.243509293 |
| 1.473459570  | 2.751670189 | 26.757020950 |
| -2.431494780 | 4.939571248 | 27.275876999 |

Ni@Au\_Rf\_fcc

1.0

|               |              |               |
|---------------|--------------|---------------|
| 8.6400995255  | 0.0000000000 | 0.0000000000  |
| -4.3200497627 | 7.4825456803 | 0.0000000000  |
| 0.0000000000  | 0.0000000000 | 40.0000000000 |

Au Ni H O

26 1 9 4

Cartesian

|              |             |              |
|--------------|-------------|--------------|
| 0.017984998  | 0.367065190 | 22.916994095 |
| 1.449075048  | 1.160736307 | 20.464699268 |
| -0.000043130 | 1.995370371 | 17.999999523 |
| 2.858305090  | 0.311090012 | 22.987246513 |

|              |             |              |
|--------------|-------------|--------------|
| 4.323897704  | 1.162454389 | 20.477199554 |
| 2.880047681  | 1.995370371 | 17.999999523 |
| 5.781627885  | 0.319436827 | 22.932348251 |
| 7.198661522  | 1.163712651 | 20.465457439 |
| 5.760052102  | 1.995370371 | 17.999999523 |
| -1.383472283 | 2.823361795 | 22.947607040 |
| 0.020390259  | 3.645814412 | 20.495181084 |
| -1.440045470 | 4.489527587 | 17.999999523 |
| 2.887640308  | 3.651960885 | 20.467326641 |
| 1.440045341  | 4.489527587 | 17.999999523 |
| 4.329924182  | 2.857088789 | 22.992439270 |
| 5.763963066  | 3.652191464 | 20.483632088 |
| 4.320049763  | 4.489527587 | 17.999999523 |
| -2.852926421 | 5.305527556 | 22.955396175 |
| -1.433170868 | 6.152195444 | 20.483045578 |
| -2.880047552 | 6.983684356 | 17.999999523 |
| 0.032745643  | 5.274455121 | 22.940564156 |
| 1.440263439  | 6.153235057 | 20.465576649 |
| 0.000043259  | 6.983684356 | 17.999999523 |
| 2.859767372  | 5.288268462 | 22.921617031 |
| 4.328069960  | 6.147448279 | 20.481219292 |
| 2.880047681  | 6.983684356 | 17.999999523 |
| 1.470357914  | 2.808660925 | 22.629556656 |
| 2.660226490  | 2.125285441 | 23.562846184 |
| 2.454255442  | 2.674789438 | 26.824481487 |
| 0.707440305  | 4.076967085 | 27.130107880 |



|              |             |              |
|--------------|-------------|--------------|
| 3.780520938  | 6.402496018 | 26.800780296 |
| 2.058683077  | 4.903889460 | 27.115817070 |
| 2.946283321  | 1.846917653 | 25.590667725 |
| -1.135215513 | 3.869838330 | 25.737996101 |
| -1.377237024 | 4.941761527 | 26.834182739 |
| 2.701570922  | 6.637231832 | 25.711176395 |
| 1.651053250  | 4.058575165 | 27.441897392 |
| 2.814208519  | 6.456278492 | 26.666369438 |
| 2.933946863  | 1.833757025 | 26.557247639 |
| -1.013786264 | 4.045496377 | 26.693735123 |

**Ni@Au\_Volmer**

**1.0**

|               |              |               |
|---------------|--------------|---------------|
| 8.6400995255  | 0.0000000000 | 0.0000000000  |
| -4.3200497627 | 7.4825456803 | 0.0000000000  |
| 0.0000000000  | 0.0000000000 | 40.0000000000 |

**Au Ni O H**

**26 1 4 9**

**Cartesian**

|              |             |              |
|--------------|-------------|--------------|
| 0.019640482  | 0.382986134 | 22.905824184 |
| 1.431639866  | 1.179739128 | 20.448520184 |
| -0.000043130 | 1.995370371 | 17.999999523 |
| 2.845068574  | 0.394066365 | 22.859921455 |
| 4.323895258  | 1.164167677 | 20.437335968 |
| 2.880047681  | 1.995370371 | 17.999999523 |
| 5.747650482  | 0.329181639 | 22.921195030 |

|              |             |              |
|--------------|-------------|--------------|
| 7.192150310  | 1.159714199 | 20.454597473 |
| 5.760052102  | 1.995370371 | 17.999999523 |
| -1.386049052 | 2.825870067 | 22.885646820 |
| 0.006952237  | 3.654557019 | 20.452201366 |
| -1.440045470 | 4.489527587 | 17.999999523 |
| 2.861822440  | 3.656507130 | 20.460002422 |
| 1.440045599  | 4.489527587 | 17.999999523 |
| 4.263748345  | 2.834523475 | 22.876112461 |
| 5.757922232  | 3.661512749 | 20.452136993 |
| 4.320049763  | 4.489527587 | 17.999999523 |
| -2.887134829 | 5.321183746 | 22.906186581 |
| -1.445425442 | 6.152009910 | 20.454976559 |
| -2.880047423 | 6.983684356 | 17.999999523 |
| 0.031328133  | 5.276957596 | 22.884085178 |
| 1.440988545  | 6.157688758 | 20.450360775 |
| 0.000043517  | 6.983684356 | 17.999999523 |
| 2.850942502  | 5.284094845 | 22.916033268 |
| 4.316822835  | 6.153833582 | 20.466928482 |
| 2.880047681  | 6.983684356 | 17.999999523 |
| 1.418500474  | 2.820627848 | 22.680172920 |
| -0.622968673 | 4.149628951 | 26.668939590 |
| 1.470186422  | 2.858618550 | 25.772452354 |
| -0.636108001 | 6.804352206 | 25.993909836 |
| 5.628799804  | 2.972280020 | 26.008331776 |
| -0.663869828 | 5.097930953 | 26.361277103 |
| -1.472317773 | 3.723808365 | 26.364881992 |

|              |             |              |
|--------------|-------------|--------------|
| 2.232271421  | 3.466977540 | 25.840115547 |
| 0.648104695  | 3.403761168 | 26.056480408 |
| -1.556230189 | 7.133602277 | 26.010358334 |
| -0.389078598 | 6.853994068 | 25.037209988 |
| 1.369908716  | 2.787962990 | 24.215710163 |
| 5.488505567  | 3.107502200 | 25.037298203 |
| 5.702656460  | 2.002378729 | 26.100206375 |

Ni@Au\_Heyrovsky

1.0

|               |              |               |
|---------------|--------------|---------------|
| 8.6400995255  | 0.0000000000 | 0.0000000000  |
| -4.3200497627 | 7.4825456803 | 0.0000000000  |
| 0.0000000000  | 0.0000000000 | 40.0000000000 |

Au Ni H O

26 1 10 4

Cartesian

|              |             |              |
|--------------|-------------|--------------|
| -0.000043130 | 1.995370371 | 17.999999523 |
| 2.880047681  | 1.995370371 | 17.999999523 |
| 5.760052102  | 1.995370371 | 17.999999523 |
| -1.440045470 | 4.489527587 | 17.999999523 |
| 1.440045341  | 4.489527587 | 17.999999523 |
| 4.320049763  | 4.489527587 | 17.999999523 |
| -2.880047552 | 6.983684356 | 17.999999523 |
| 0.000043259  | 6.983684356 | 17.999999523 |
| 2.880047681  | 6.983684356 | 17.999999523 |
| 0.011525413  | 0.360789156 | 22.928290367 |

|              |             |              |
|--------------|-------------|--------------|
| 1.440188315  | 1.181719120 | 20.503907204 |
| 2.867882376  | 0.361873145 | 22.930757999 |
| 4.326268332  | 1.160845910 | 20.471651554 |
| 5.756743951  | 0.332672382 | 22.989997864 |
| 7.193587969  | 1.160791164 | 20.473237038 |
| -1.412334595 | 2.824916308 | 22.936248779 |
| 0.014397320  | 3.651181956 | 20.507481098 |
| 2.865787091  | 3.649969297 | 20.505328178 |
| 4.291375760  | 2.825056351 | 22.931253910 |
| 5.761056590  | 3.661492010 | 20.472140312 |
| -2.878718668 | 5.320266336 | 22.967660427 |
| -1.441190550 | 6.150598338 | 20.474765301 |
| 0.017417736  | 5.298630698 | 22.943432331 |
| 1.440060791  | 6.158648984 | 20.474872589 |
| 2.864470261  | 5.301101507 | 22.930581570 |
| 4.324287101  | 6.150776735 | 20.473423004 |
| 1.427821022  | 2.832129154 | 22.727575302 |
| 1.506246670  | 2.819912696 | 24.358136654 |
| 0.881127784  | 3.737403169 | 27.006654739 |
| -0.796852622 | 4.987558915 | 27.383496761 |
| 0.541717275  | 5.851828867 | 27.358939648 |
| 1.392393182  | 2.871184221 | 25.230801105 |
| 2.240053693  | 2.870688276 | 26.966543198 |
| -2.627463900 | 4.778793361 | 26.056292057 |
| -2.874169455 | 5.842082104 | 27.160441875 |
| 5.339794333  | 0.177063598 | 26.042299271 |

|              |             |              |
|--------------|-------------|--------------|
| 6.433248973  | 0.017840124 | 27.132096291 |
| 0.168160993  | 4.970162455 | 27.637836933 |
| 1.310139999  | 2.862505169 | 26.654980183 |
| -2.491926257 | 4.956892781 | 27.007431984 |
| 1.149985171  | 7.444684317 | 26.987438202 |

**Cu@Au\_Rf\_sur**

**1.0**

|               |              |               |
|---------------|--------------|---------------|
| 8.6400995255  | 0.0000000000 | 0.0000000000  |
| -4.3200497627 | 7.4825456803 | 0.0000000000  |
| 0.0000000000  | 0.0000000000 | 40.0000000000 |

**Au Cu H O**  
**26 1 8 4**

**Cartesian**

|              |             |              |
|--------------|-------------|--------------|
| 0.021394345  | 0.373669281 | 22.934107780 |
| 1.440033496  | 1.165990791 | 20.481271744 |
| -0.000043130 | 1.995370371 | 17.999999523 |
| 2.858280483  | 0.374773368 | 22.934486866 |
| 4.325099305  | 1.161062663 | 20.477075577 |
| 2.880047681  | 1.995370371 | 17.999999523 |
| 5.760155293  | 0.330513685 | 22.974431515 |
| 7.195138797  | 1.161482121 | 20.477089882 |
| 5.760052102  | 1.995370371 | 17.999999523 |
| -1.393026475 | 2.824195804 | 22.934889793 |
| 0.002306640  | 3.657453976 | 20.482926369 |
| -1.440045470 | 4.489527587 | 17.999999523 |

|              |             |              |
|--------------|-------------|--------------|
| 2.878183545  | 3.657278923 | 20.481772423 |
| 1.440045341  | 4.489527587 | 17.999999523 |
| 4.273155283  | 2.824262703 | 22.935092449 |
| 5.760061630  | 3.659841830 | 20.476605892 |
| 4.320049763  | 4.489527587 | 17.999999523 |
| -2.878494406 | 5.319195949 | 22.937152386 |
| -1.440768130 | 6.151431455 | 20.477247238 |
| -2.880047552 | 6.983684356 | 17.999999523 |
| 0.025714999  | 5.281928650 | 22.940254211 |
| 1.439973758  | 6.157484938 | 20.477497578 |
| 0.000043259  | 6.983684356 | 17.999999523 |
| 2.854891446  | 5.281492914 | 22.935907841 |
| 4.321634130  | 6.151530912 | 20.476942062 |
| 2.880047681  | 6.983684356 | 17.999999523 |
| 1.440721909  | 2.825361857 | 22.651164532 |
| 1.035011064  | 3.545371550 | 27.018735409 |
| -0.691862499 | 4.918325409 | 27.484681606 |
| 2.363131812  | 7.243576487 | 27.179934978 |
| 0.659372935  | 5.746724917 | 27.470378876 |
| 1.474184419  | 2.799659641 | 25.712757111 |
| -2.543447778 | 4.709187449 | 26.151421070 |
| -2.758819857 | 5.814214139 | 27.219076157 |
| 5.584504836  | 0.014795470 | 26.115052700 |
| 0.262483998  | 4.883539178 | 27.763457298 |
| 1.395873356  | 7.307496416 | 27.063875198 |
| 1.496864839  | 2.720983985 | 26.674022675 |

**-2.409930955      4.910833594      27.096750736**

**Cu@Au\_Rf\_top**

**1.0**

**8.6400995255      0.0000000000      0.0000000000**  
**-4.3200497627      7.4825456803      0.0000000000**  
**0.0000000000      0.0000000000      40.0000000000**

**Au   Cu   H   O**

**26   1   9   4**

**Cartesian**

**0.007613082      0.347019662      22.926754951**  
**1.440301227      1.174785690      20.492186546**  
**-0.000043130      1.995370371      17.999999523**  
**2.872442581      0.346341443      22.927393913**  
**4.321970869      1.162785763      20.472116470**  
**2.880047681      1.995370371      17.999999523**  
**5.760058475      0.329665403      22.944169044**  
**7.198082738      1.162500326      20.471684933**  
**5.760052102      1.995370371      17.999999523**  
**-1.420393320      2.821699127      22.925765514**  
**0.008391377      3.653335217      20.489323139**  
**-1.440045470      4.489527587      17.999999523**  
**2.871588325      3.653758689      20.488502979**  
**1.440045341      4.489527587      17.999999523**  
**4.300045489      2.821898041      22.926800251**  
**5.759870954      3.658419331      20.470774174**

|              |             |              |
|--------------|-------------|--------------|
| 4.320049763  | 4.489527587 | 17.999999523 |
| -2.880154396 | 5.318779390 | 22.919239998 |
| -1.439762225 | 6.151921157 | 20.470890999 |
| -2.880047552 | 6.983684356 | 17.999999523 |
| 0.011967339  | 5.301042190 | 22.931747437 |
| 1.439794026  | 6.153855435 | 20.473892689 |
| 0.000043259  | 6.983684356 | 17.999999523 |
| 2.868288655  | 5.301927935 | 22.931253910 |
| 4.319704204  | 6.152131667 | 20.471291542 |
| 2.880047681  | 6.983684356 | 17.999999523 |
| 1.442752515  | 2.822352286 | 22.700982094 |
| 1.446299896  | 2.887703634 | 24.220650196 |
| 1.012793491  | 3.586062079 | 27.109625340 |
| -0.714113160 | 4.957107305 | 27.666742802 |
| 2.340137764  | 7.272543383 | 27.377386093 |
| 0.633886334  | 5.789055591 | 27.654249668 |
| 1.452221895  | 2.834600186 | 25.793023109 |
| -2.561261155 | 4.745453935 | 26.347808838 |
| -2.768810020 | 5.850236667 | 27.416357994 |
| 5.558895545  | 0.050755771 | 26.317541599 |
| 0.244044521  | 4.917309879 | 27.932598591 |
| 1.373647415  | 7.338311066 | 27.263405323 |
| 1.471982321  | 2.764222258 | 26.768445969 |
| -2.426153721 | 4.945624285 | 27.292444706 |

Cu@Au\_Rf\_fcc



1.0

|               |              |               |
|---------------|--------------|---------------|
| 8.6400995255  | 0.0000000000 | 0.0000000000  |
| -4.3200497627 | 7.4825456803 | 0.0000000000  |
| 0.0000000000  | 0.0000000000 | 40.0000000000 |

Au Cu H O

26 1 9 4

Cartesian

|              |             |              |
|--------------|-------------|--------------|
| 0.007040719  | 0.371887812 | 22.908346653 |
| 1.445672831  | 1.167519548 | 20.469977856 |
| -0.000043130 | 1.995370371 | 17.999999523 |
| 2.843872831  | 0.292572628 | 23.001546860 |
| 4.317613216  | 1.166081328 | 20.467817783 |
| 2.880047681  | 1.995370371 | 17.999999523 |
| 5.764331959  | 0.328615365 | 22.920649052 |
| 7.195096439  | 1.165901257 | 20.460879803 |
| 5.760052102  | 1.995370371 | 17.999999523 |
| -1.396764434 | 2.824670342 | 22.933456898 |
| 0.013810231  | 3.650342148 | 20.493733883 |
| -1.440045470 | 4.489527587 | 17.999999523 |
| 2.880352297  | 3.651735881 | 20.472006798 |
| 1.440045341  | 4.489527587 | 17.999999523 |
| 4.338702574  | 2.878391492 | 23.004388809 |
| 5.753833726  | 3.654474956 | 20.477006435 |
| 4.320049763  | 4.489527587 | 17.999999523 |
| -2.873883459 | 5.317313852 | 22.926981449 |
| -1.439608243 | 6.160053867 | 20.478239059 |

|                     |                    |                     |
|---------------------|--------------------|---------------------|
| <b>-2.880047552</b> | <b>6.983684356</b> | <b>17.999999523</b> |
| <b>0.024375767</b>  | <b>5.283359847</b> | <b>22.931282520</b> |
| <b>1.435729467</b>  | <b>6.154805850</b> | <b>20.463044643</b> |
| <b>0.000043259</b>  | <b>6.983684356</b> | <b>17.999999523</b> |
| <b>2.849515207</b>  | <b>5.295102435</b> | <b>22.913641930</b> |
| <b>4.321688204</b>  | <b>6.151562132</b> | <b>20.466105938</b> |
| <b>2.880047681</b>  | <b>6.983684356</b> | <b>17.999999523</b> |
| <b>1.445732119</b>  | <b>2.822201317</b> | <b>22.694146633</b> |
| <b>2.840696518</b>  | <b>2.020305477</b> | <b>23.627855778</b> |
| <b>2.451459818</b>  | <b>2.678344014</b> | <b>26.846046448</b> |
| <b>0.710755553</b>  | <b>4.075015859</b> | <b>27.154731750</b> |
| <b>3.784461127</b>  | <b>6.395078238</b> | <b>26.840376854</b> |
| <b>2.066512986</b>  | <b>4.896336989</b> | <b>27.137346268</b> |
| <b>2.950392426</b>  | <b>1.850965053</b> | <b>25.611820221</b> |
| <b>-1.155914959</b> | <b>3.850324734</b> | <b>25.806410313</b> |
| <b>-1.369455396</b> | <b>4.951232665</b> | <b>26.878767014</b> |
| <b>2.690387655</b>  | <b>6.666820443</b> | <b>25.775165558</b> |
| <b>1.655693568</b>  | <b>4.052093527</b> | <b>27.462711334</b> |
| <b>2.818024852</b>  | <b>6.446488468</b> | <b>26.719298363</b> |
| <b>2.928257703</b>  | <b>1.836008963</b> | <b>26.581361294</b> |
| <b>-1.008355436</b> | <b>4.054030035</b> | <b>26.752083302</b> |

**Cu@Au\_Volmer**

**1.0**

|                      |                     |                     |
|----------------------|---------------------|---------------------|
| <b>8.6400995255</b>  | <b>0.0000000000</b> | <b>0.0000000000</b> |
| <b>-4.3200497627</b> | <b>7.4825456803</b> | <b>0.0000000000</b> |

0.0000000000 0.0000000000 40.0000000000

Au Cu O H

26 1 4 9

Cartesian

|              |             |              |
|--------------|-------------|--------------|
| 0.011990530  | 0.368695467 | 22.905352116 |
| 1.432257726  | 1.176235841 | 20.451016426 |
| -0.000043130 | 1.995370371 | 17.999999523 |
| 2.855334161  | 0.379362317 | 22.855925560 |
| 4.322721016  | 1.164388109 | 20.435159206 |
| 2.880047681  | 1.995370371 | 17.999999523 |
| 5.752717517  | 0.332981428 | 22.912828922 |
| 7.195149290  | 1.160091176 | 20.451707840 |
| 5.760052102  | 1.995370371 | 17.999999523 |
| -1.404331907 | 2.827207382 | 22.880444527 |
| 0.008527205  | 3.651781149 | 20.459334850 |
| -1.440045470 | 4.489527587 | 17.999999523 |
| 2.860771989  | 3.653916571 | 20.469849110 |
| 1.440045599  | 4.489527587 | 17.999999523 |
| 4.282868253  | 2.833929634 | 22.868592739 |
| 5.758665491  | 3.659551042 | 20.445520878 |
| 4.320049763  | 4.489527587 | 17.999999523 |
| -2.884092799 | 5.323885135 | 22.881810665 |
| -1.444941738 | 6.151724028 | 20.446498394 |
| -2.880047423 | 6.983684356 | 17.999999523 |
| 0.021299217  | 5.296224557 | 22.870423794 |
| 1.441133515  | 6.155754480 | 20.444962978 |

|              |             |              |
|--------------|-------------|--------------|
| 0.000043517  | 6.983684356 | 17.999999523 |
| 2.861724592  | 5.305093603 | 22.900490761 |
| 4.316138928  | 6.154044983 | 20.458557606 |
| 2.880047681  | 6.983684356 | 17.999999523 |
| 1.419728597  | 2.813214305 | 22.714767456 |
| -0.659591162 | 4.174659054 | 26.712741852 |
| 1.510408176  | 2.847742529 | 25.977468491 |
| -0.638955639 | 6.819326025 | 25.982186794 |
| 5.616939067  | 2.967634541 | 25.994727612 |
| -0.687188063 | 5.112762945 | 26.377420425 |
| -1.491090706 | 3.738173179 | 26.380176544 |
| 2.248321215  | 3.486148389 | 25.947701931 |
| 0.681955378  | 3.397137035 | 26.194350719 |
| -1.555065539 | 7.159512772 | 26.001660824 |
| -0.396839755 | 6.858303712 | 25.024037361 |
| 1.374105370  | 2.694394687 | 24.263417721 |
| 5.488796536  | 3.093328496 | 25.021092892 |
| 5.686593662  | 1.998460667 | 26.097445488 |

**Cu@Au\_Heyrovsky**

**1.0**

|               |              |               |
|---------------|--------------|---------------|
| 8.6400995255  | 0.0000000000 | 0.0000000000  |
| -4.3200497627 | 7.4825456803 | 0.0000000000  |
| 0.0000000000  | 0.0000000000 | 40.0000000000 |

**Au Cu H O**

**26 1 10 4**

## Cartesian

|              |             |              |
|--------------|-------------|--------------|
| -0.001499571 | 0.350294627 | 22.919061184 |
| 1.436550619  | 1.179994348 | 20.521030426 |
| -0.000043130 | 1.995370371 | 17.999999523 |
| 2.871940369  | 0.349489440 | 22.920019627 |
| 4.321199800  | 1.161836910 | 20.467228889 |
| 2.880047681  | 1.995370371 | 17.999999523 |
| 5.751207969  | 0.328373608 | 22.996873856 |
| 7.190476657  | 1.161468630 | 20.468842983 |
| 5.760052102  | 1.995370371 | 17.999999523 |
| -1.434063571 | 2.826071880 | 22.924075127 |
| 0.009518175  | 3.652295158 | 20.524990559 |
| -1.440045341 | 4.489527587 | 17.999999523 |
| 2.862333439  | 3.651253092 | 20.523927212 |
| 1.440045599  | 4.489527587 | 17.999999523 |
| 4.307967452  | 2.823290658 | 22.912247181 |
| 5.757214507  | 3.664427992 | 20.453319550 |
| 4.320049763  | 4.489527587 | 17.999999523 |
| -2.886107826 | 5.317435609 | 22.962009907 |
| -1.448397321 | 6.149728648 | 20.457084179 |
| -2.880047423 | 6.983684356 | 17.999999523 |
| 0.003396359  | 5.318382455 | 22.928307056 |
| 1.435657368  | 6.156845828 | 20.466234684 |
| 0.000043517  | 6.983684356 | 17.999999523 |
| 2.866845138  | 5.323623782 | 22.913005352 |
| 4.322906670  | 6.149769234 | 20.456593037 |

|              |             |              |
|--------------|-------------|--------------|
| 2.880047681  | 6.983684356 | 17.999999523 |
| 1.406487044  | 2.811864503 | 22.778513432 |
| 1.625163154  | 2.960031004 | 24.397485256 |
| 0.701313210  | 3.684704685 | 26.904220581 |
| -0.942987747 | 4.882813991 | 27.060086727 |
| 0.401923222  | 5.739238007 | 27.033965588 |
| 1.374042927  | 2.870878938 | 25.306322575 |
| 2.035894380  | 2.737590590 | 26.999428272 |
| -2.590258652 | 4.851800873 | 25.511157513 |
| -3.060202921 | 5.572510554 | 26.810984612 |
| 1.075579406  | 7.269533366 | 25.471990108 |
| 1.897566376  | 7.455552311 | 26.785080433 |
| 0.000149605  | 4.897649105 | 27.396960258 |
| 1.148408013  | 2.783244145 | 26.578452587 |
| -2.559920572 | 4.795940064 | 26.495020390 |
| 1.002975592  | 7.245079489 | 26.455779076 |
